# Supplementary material for: Multi-resonance thermally activated delayed fluorescence molecules with intramolecular-lock: theoretical design and performance prediction
Source: Royal Society of Chemistry journal article supplement (doi:10.1039/d3cp02255b), 2023-01-01
Supplement: d3cp02255b1.pdf [file d3cp02255b1.pdf]

# Multi-Resonance Thermally Activated Delayed Fluorescence Molecules with Intramolecular-lock: Theoretical Design and Performance Prediction

Zhimin Wu, Qun Zhang, Xiaofei Wang, Kai Zhang, Xiaofang Li, Rui Li, Yuzhi Song,

Jianzhong Fan, Chuan-Kui Wang\*, Lili Lin\*, Zhongjie Wang\*

Shandong Key Laboratory of Medical Physics and Image Processing & Shandong

Provincial Engineering and Technical Center of Light Manipulations, School of

Physics and Electronics, Shandong Normal University, Jinan 250358, China

\*Author to whom correspondence should be addressed.

E-mail: ckwang@sdu.edu.cn; linll@sdu.edu.cn; wangzhongjie@sdu.edu.cn.

To confirm that the O3LYP function is suitable for the simulation of MR-TADF systems, the energy gap between S<sub>1</sub> and T<sub>1</sub>, FWHM,  $k_r$  and  $k_{IC}$  are compared with experimental values of 8 MR-TADF molecules as shown in Table S1 and S2. Calculating the mean average deviation (MAD), which was determined according to the equation

$$MAD = \frac{1}{n} \sum_{i=1}^n |x_i| \#(1)$$

where  $x_i = y_i^{Experiment} - y_i^{Calculated}$ , with  $y_i^{Experiment}$  being emission energy of S<sub>1</sub>,  $\Delta E_{ST}$  obtained from the peak maxima (or the difference thereof) of the fluorescence and phosphorescence spectra to measure the six functionals for the eight molecules with experimental data, and we can find that the results O3LYP fits the experimental data better for S<sub>1</sub> and energy gap ( $\Delta E_{ST}$ ). Although it is proved that the TD-DFT method could overestimate the energy gap between S<sub>1</sub> and T<sub>1</sub>, we find that the general rule obtained from TD-DFT is similar to the results of the SCS-CC2 method which has been proven to provide better S-T energy gap (as shown in Fig. S1) [1]. The reason why the SCS-CC2 method is not used here is because it is time consuming and the cost performance is not high. Considering the computational cost and the prediction precision, we choose to use O3LYP here.

The formula of RMSD is shown as:

$$RMSD = \sqrt{\frac{1}{N} \sum_i^{natom} [(x_i - x'_i)^2 + (y_i - y'_i)^2 + (z_i - z'_i)^2]} \#(2)$$

where  $i$  is the atomic ordinal number,  $x_i$  and  $x'_i$  are the  $x$  coordinates of the  $i$ th atom,  $y$  and  $z$  have the same meaning. Which is used to compare the structure, when one has two similar structures. The first figure out how to compare two structures, which usually means that you must find the root mean square deviation (RMSD). VMD using an algorithm computes the transformation, needed to move one structure onto another in order to minimize the RMSD to get the difference in the molecule structures.

To quantitatively categorize the transition property, the  $S_r^{index}$ , which is the full

space integral to the  $S_r(r)$  functions is defined as:

$$S_{r,index} = \int S_r(r) dr \equiv \int \sqrt{\rho^{hole}(r)\rho^{ele}(r)} dr \#(3)$$

Here  $\rho^{hole}$  is the hole density and  $\rho^{ele}$  is the electron density.  $S_{r,index}$  which represents the particle-hole overlap, using this formula we can clearly understand which regions of the electron and hole overlap compare significantly.

In order to show that O3LYP is a suitable functional, we calculated different other physical quantities for eight molecules for which experimental data are available. Calculating the mean average deviation (MAD), which was determined according to the equation

In order to describe the process of intersystem crossing (ISC) and reverse intersystem crossing (RISC), the spin-orbit coupling (SOC) of the singlet and triplet states in the compounds was studied. [2] SOC is a relativistic effect, which arises naturally in Dirac theory, a fully relativistic one-particle theory for spin 1/2 systems. [3] The SOC matrix elements  $\langle S_1 | H_{SO} | T_1 \rangle$  between excited states can be evaluated as residues of quadratic response functions [4,5]. The electronic spin-orbit interaction operator, referred to as the Breit-Pauli spin-orbit Hamiltonian, is given by

$$H_{SO} = \frac{\alpha^2}{2} \left[ \sum_{iA} Z_A \frac{l_{iA} \cdot s_i}{r_{iA}^3} - \sum_{ij} \frac{l_{ij} \cdot (s_i + 2s_j)}{r_{ij}^3} \right] \#(4)$$

where i, j refers to electrons and A to nuclei. Note that the relative orbital angular momentum between two particles, e.g.  $l_{ij} = (r_i - r_j) \times p_i$  is asymmetric, i.e.  $l_{ij} \neq l_{ji}$ . This means that the two-electron integrals over this operator do not have the permutation symmetry as do the electron repulsion integrals. They could have been symmetrized, had it not been the asymmetry in the spin part, which has its origin in the Thomas precession [6]. This formalism is implemented in the powerful molecular electronic structure program DALTON to exploit the structure of the excited states that need to be calculated based on the spin-orbit operators, to obtain three components of the transition dipole moment. Getting the square root of the three components is the total transition dipole moment and the conversion unit is given in  $\text{cm}^{-1}$  which are the values of SOC.

[7,8]

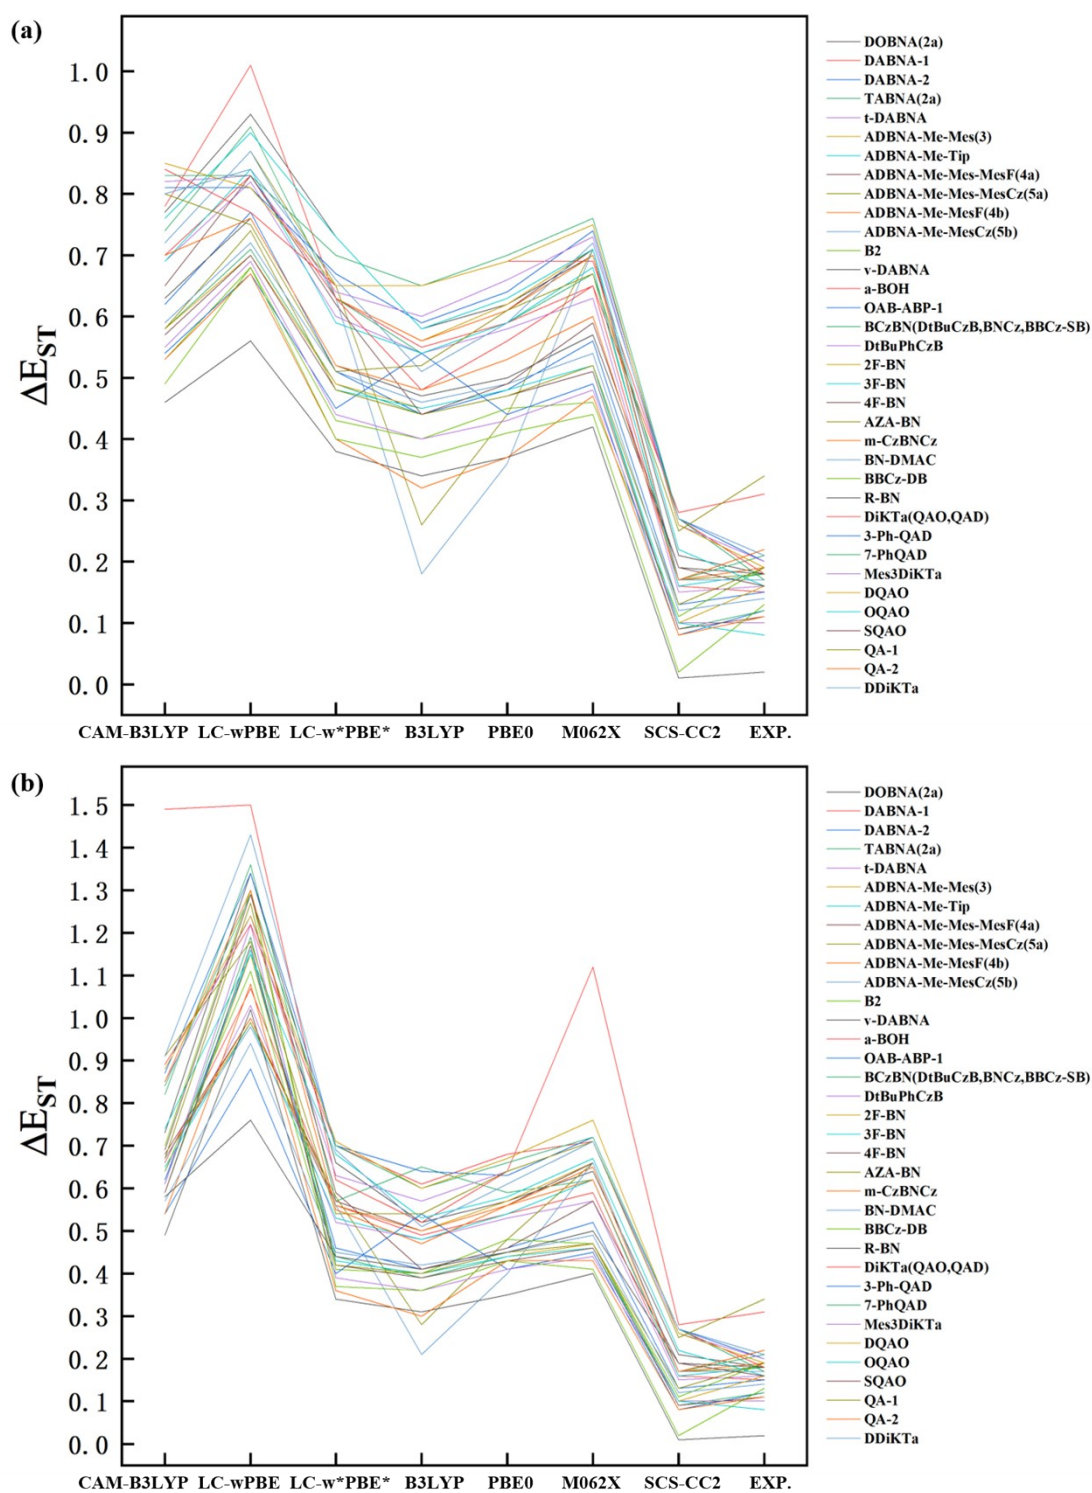

**Fig. S1.** The diagram of  $\Delta E_{ST}$  for theoretical and experimental structures by time-dependent density functional theory (TD-DFT) (a) and consider the Tamm-Dancoff approximation (TDA) (b). DFT functionals used 6-31G(d,p) basis set, SCS-CC2 used cc-pVDZ, calculations are in the gas phase[1].

**Table S1.** Energy gap ( $\Delta E_{ST}$ ) between  $S_1$  and  $T_1$  was calculated using different functionals for the eight molecules in toluene. The full width at half maximum (FWHM) from  $S_1$  to  $S_0$  was calculated using different functionals for the eight molecules in toluene. And the radiation rates ( $k_r$ ) and the internal conversion rate ( $k_{IC}$ ) between  $S_1$  and  $S_0$  was calculated using different functionals for the eight molecules in toluene. Experimental values are also listed.

|                  |                            | <b>O3LYP</b>          | <b>B3LYP</b>       | <b>PBE0</b>        | <b>PBE33</b>       | <b>BMK</b>         | <b>M062X</b>       | <b>EXP.</b>                     |
|------------------|----------------------------|-----------------------|--------------------|--------------------|--------------------|--------------------|--------------------|---------------------------------|
| <b>2PXZBN</b>    | $\Delta E_{ST}(\text{eV})$ | 0.31                  | 0.37               | 0.40               | 0.43               | 0.43               | 0.43               | 0.19 <sup>a</sup>               |
|                  | FWHM(nm)                   | 86                    | 32                 | 30                 | 27                 | 23                 | 22                 | 34 <sup>a</sup>                 |
|                  | $k_r(\text{s}^{-1})$       | $2.55 \times 10^7$    | $6.92 \times 10^7$ | $8.10 \times 10^7$ | $1.04 \times 10^8$ | $1.23 \times 10^8$ | $1.50 \times 10^8$ | $1.33 \times 10^8$ <sup>a</sup> |
|                  | $k_{IC}(\text{s}^{-1})$    | $2.04 \times 10^8$    | $1.08 \times 10^8$ | $1.05 \times 10^8$ | $9.76 \times 10^7$ | $9.29 \times 10^7$ | $9.74 \times 10^7$ | $3.82 \times 10^7$ <sup>a</sup> |
| <b>2DMACBN</b>   | $\Delta E_{ST}(\text{eV})$ | 0.30                  | 0.33               | 0.36               | 0.40               | 0.40               | 0.40               | 0.14 <sup>a</sup>               |
|                  | FWHM(nm)                   | 37                    | 27                 | 25                 | 22                 | 20                 | 18                 | 29 <sup>a</sup>                 |
|                  | $k_r(\text{s}^{-1})$       | $6.68 \times 10^7$    | $9.75 \times 10^7$ | $1.16 \times 10^8$ | $1.50 \times 10^8$ | $1.73 \times 10^8$ | $2.09 \times 10^8$ | $9.20 \times 10^7$ <sup>b</sup> |
|                  | $k_{IC}(\text{s}^{-1})$    | $1.10 \times 10^8$    | $9.84 \times 10^7$ | $9.61 \times 10^7$ | $8.96 \times 10^7$ | $8.79 \times 10^7$ | $9.04 \times 10^7$ | $5.44 \times 10^7$ <sup>b</sup> |
| <b>2DPABN</b>    | $\Delta E_{ST}(\text{eV})$ | 0.36                  | 0.41               | 0.45               | 0.49               | 0.49               | 0.49               | 0.15 <sup>c</sup>               |
|                  | FWHM(nm)                   | 17                    | 13                 | 13                 | 11                 | 8                  | 8                  | 33 <sup>d</sup>                 |
|                  | $k_r(\text{s}^{-1})$       | $5.44 \times 10^7$    | $7.68 \times 10^7$ | $9.57 \times 10^7$ | $1.32 \times 10^8$ | $1.61 \times 10^8$ | $1.97 \times 10^8$ | $9.60 \times 10^7$ <sup>b</sup> |
|                  | $k_{IC}(\text{s}^{-1})$    | $8.46 \times 10^7$    | $8.48 \times 10^7$ | $8.36 \times 10^7$ | $8.04 \times 10^7$ | $8.12 \times 10^7$ | $8.37 \times 10^7$ | $1.30 \times 10^7$ <sup>b</sup> |
| <b>2PTZBN</b>    | $\Delta E_{ST}(\text{eV})$ | 0.25                  | 0.32               | 0.35               | 0.38               | 0.38               | 0.39               | 0.15 <sup>a</sup>               |
|                  | FWHM(nm)                   | 122                   | 44                 | 41                 | 35                 | 31                 | 27                 | 39 <sup>a</sup>                 |
|                  | $k_r(\text{s}^{-1})$       | $2.09 \times 10^7$    | $6.70 \times 10^7$ | $7.96 \times 10^7$ | $1.04 \times 10^8$ | $1.27 \times 10^8$ | $1.54 \times 10^8$ | $9.98 \times 10^7$ <sup>a</sup> |
|                  | $k_{IC}(\text{s}^{-1})$    | $1.83 \times 10^8$    | $1.05 \times 10^8$ | $1.03 \times 10^8$ | $9.47 \times 10^7$ | $9.35 \times 10^7$ | $9.28 \times 10^7$ | $7.17 \times 10^7$ <sup>a</sup> |
| <b>2CzBN</b>     | $\Delta E_{ST}(\text{eV})$ | 0.33                  | 0.33               | 0.36               | 0.40               | 0.38               | 0.39               | 0.14 <sup>a</sup>               |
|                  | FWHM(nm)                   | 21                    | 8                  | 8                  | 7                  | 5                  | 7                  | 25 <sup>a</sup>                 |
|                  | $k_r(\text{s}^{-1})$       | $7.82 \times 10^7$    | $1.35 \times 10^8$ | $1.61 \times 10^8$ | $2.09 \times 10^8$ | $2.43 \times 10^8$ | $2.91 \times 10^8$ | $1.30 \times 10^8$ <sup>a</sup> |
|                  | $k_{IC}(\text{s}^{-1})$    | $1.07 \times 10^8$    | $9.08 \times 10^7$ | $1.04 \times 10^8$ | $9.04 \times 10^7$ | $8.33 \times 10^7$ | $7.88 \times 10^7$ | /                               |
| <b>2TMCzBN</b>   | $\Delta E_{ST}(\text{eV})$ | 0.34                  | 0.33               | 0.37               | 0.41               | 0.39               | 0.39               | 0.09 <sup>a</sup>               |
|                  | FWHM(nm)                   | 32                    | 14                 | 14                 | 12                 | 12                 | 18                 | 27 <sup>a</sup>                 |
|                  | $k_r(\text{s}^{-1})$       | $8.43 \times 10^7$    | $1.44 \times 10^8$ | $1.70 \times 10^8$ | $2.19 \times 10^8$ | $2.52 \times 10^8$ | $3.00 \times 10^8$ | $1.60 \times 10^8$ <sup>a</sup> |
|                  | $k_{IC}(\text{s}^{-1})$    | $8.96 \times 10^{10}$ | $1.12 \times 10^8$ | $1.09 \times 10^8$ | $1.03 \times 10^8$ | $1.02 \times 10^8$ | $1.09 \times 10^8$ | /                               |
| <b>PTZDMACBN</b> | $\Delta E_{ST}(\text{eV})$ | 0.30                  | 0.32               | 0.35               | 0.39               | 0.39               | 0.39               | 0.14 <sup>e</sup>               |
|                  | FWHM(nm)                   | 66                    | 42                 | 39                 | 32                 | 47                 | 24                 | 48 <sup>e</sup>                 |
|                  | $k_r(\text{s}^{-1})$       | $4.60 \times 10^7$    | $7.66 \times 10^7$ | $9.05 \times 10^7$ | $1.20 \times 10^8$ | $1.47 \times 10^8$ | $1.76 \times 10^8$ | $1.00 \times 10^8$ <sup>e</sup> |
|                  | $k_{IC}(\text{s}^{-1})$    | $1.17 \times 10^8$    | $1.02 \times 10^8$ | $9.96 \times 10^7$ | $9.23 \times 10^7$ | $7.84 \times 10^8$ | $9.16 \times 10^7$ | $1.50 \times 10^7$ <sup>e</sup> |
| <b>DPACzBN</b>   | $\Delta E_{ST}(\text{eV})$ | 0.39                  | 0.38               | 0.42               | 0.46               | 0.45               | 0.45               | 0.11 <sup>a</sup>               |
|                  | FWHM(nm)                   | 23                    | 12                 | 12                 | 10                 | 10                 | 9                  | 23 <sup>a</sup>                 |
|                  | $k_r(\text{s}^{-1})$       | $5.01 \times 10^7$    | $1.08 \times 10^8$ | $1.30 \times 10^8$ | $1.72 \times 10^8$ | $2.01 \times 10^8$ | $2.42 \times 10^8$ | $1.50 \times 10^8$ <sup>f</sup> |
|                  | $k_{IC}(\text{s}^{-1})$    | $8.43 \times 10^7$    | $9.46 \times 10^7$ | $9.31 \times 10^7$ | $8.88 \times 10^7$ | $8.93 \times 10^7$ | $9.23 \times 10^7$ | $2.00 \times 10^2$ <sup>f</sup> |

- a Measured in  $1 \times 10^{-5}$  M toluene solution at 300K.  
 b Measured in 1 wt% doped films of emitters in mCBP at 300 K.  
 c Measured in the saturated in EtOH at 300K.  
 d Measured in  $2 \times 10^{-5}$  M in  $\text{CH}_2\text{Cl}_2$  at 300K.  
 e Measured in  $1 \times 10^{-5}$  M toluene solution at 298K.  
 f Measured in 3 wt % doped 26DCzPPy film at 326K.

**Table S2.** Mean average deviation (MAD) of  $S_1$ , energy gap ( $\Delta E_{ST}$ ), full width at half maximum (FWHM), radiation rates ( $k_r$ ) and internal conversion rate ( $k_{IC}$ ) between computed and experimental data.

|                                   | O3LYP              | B3LYP              | PBE0               | PBE33              | BMK                | M062X              |
|-----------------------------------|--------------------|--------------------|--------------------|--------------------|--------------------|--------------------|
| MAD- $S_1$ (eV)                   | 0.22               | 0.16               | 0.20               | 0.38               | 0.41               | 0.59               |
| MAD- $\Delta E_{ST}$ (eV)         | 0.18               | 0.21               | 0.24               | 0.28               | 0.28               | 0.28               |
| MAD-FWHM(nm)                      | 23                 | 10                 | 10                 | 13                 | 13                 | 16                 |
| MAD- $k_r$ ( $\text{s}^{-1}$ )    | $6.68 \times 10^7$ | $2.61 \times 10^7$ | $2.08 \times 10^7$ | $3.84 \times 10^7$ | $6.08 \times 10^7$ | $9.48 \times 10^7$ |
| MAD- $k_{IC}$ ( $\text{s}^{-1}$ ) | $9.84 \times 10^7$ | $6.68 \times 10^7$ | $6.46 \times 10^7$ | $5.85 \times 10^7$ | $1.73 \times 10^8$ | $5.93 \times 10^7$ |

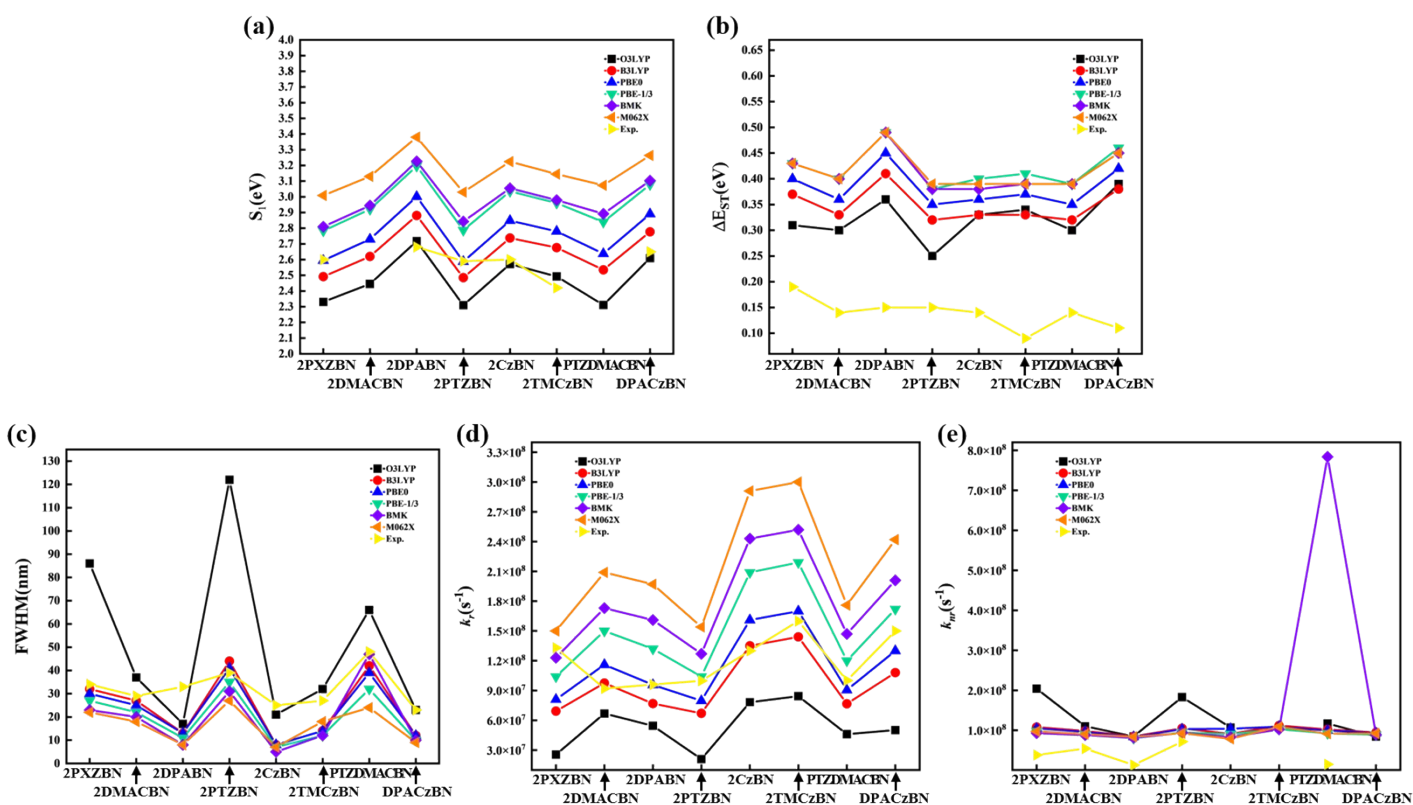

**Fig. S2.** The energy of  $S_1$  (a), energy gap ( $\Delta E_{ST}$ ) (b), full width at half maximum (FWHM) (c), radiation rates ( $k_r$ ) (d) and internal conversion rate ( $k_{IC}$ ) (e) for calculated using different functionals for the eight molecules in toluene and experimental data.

**Table S3.** The cartesian coordinates of the studied 36 molecules by O3LYP/6-31G(d) in toluene.

| <b>2PXZBN</b> | <b>S<sub>0</sub></b> |           |           | <b>S<sub>1</sub></b> |           |           | <b>T<sub>1</sub></b> |           |           |
|---------------|----------------------|-----------|-----------|----------------------|-----------|-----------|----------------------|-----------|-----------|
| C             | -1.532651            | -2.192185 | -0.084041 | 1.498206             | -2.201589 | -0.025126 | 1.497184             | -2.194328 | -0.019397 |
| C             | -0.407842            | -2.993005 | 0.067807  | 0.361250             | -3.010359 | -0.090162 | 0.362283             | -3.008894 | -0.111816 |
| C             | 0.868273             | -2.432658 | 0.140107  | -0.894557            | -2.422668 | -0.101053 | -0.892986            | -2.414113 | -0.139559 |
| C             | 1.021742             | -1.041174 | 0.062411  | -1.021776            | -1.011388 | -0.030455 | -1.021671            | -1.009909 | -0.047658 |
| C             | -0.122966            | -0.207600 | -0.048528 | 0.121587             | -0.183786 | 0.014442  | 0.119867             | -0.171370 | 0.011377  |
| C             | -1.399233            | -0.801224 | -0.126167 | 1.375672             | -0.794231 | 0.045034  | 1.378763             | -0.793134 | 0.050837  |
| H             | -0.538464            | -4.069433 | 0.125057  | 0.481645             | -4.084801 | -0.176200 | 0.484868             | -4.081692 | -0.206441 |
| H             | 1.721582             | -3.084179 | 0.281744  | -1.768993            | -3.051594 | -0.213581 | -1.767434            | -3.040242 | -0.270181 |
| B             | -0.016497            | 1.308506  | -0.050376 | 0.018722             | 1.358344  | -0.003274 | 0.018266             | 1.351116  | -0.006089 |
| N             | 2.280704             | -0.422676 | 0.129453  | -2.271741            | -0.394601 | -0.068840 | -2.277990            | -0.391807 | -0.074634 |
| N             | -2.558337            | -0.021058 | -0.235450 | 2.542173             | -0.024298 | 0.157112  | 2.547533             | -0.020224 | 0.158531  |
| C             | 2.405108             | 0.920347  | 0.535659  | -2.416972            | 0.943944  | -0.552273 | -2.424585            | 0.947048  | -0.542382 |
| C             | 3.651631             | 1.320142  | 1.055025  | -3.658738            | 1.296909  | -1.080894 | -3.672538            | 1.308917  | -1.058402 |
| C             | 1.337505             | 1.849710  | 0.464932  | -1.342658            | 1.878492  | -0.498138 | -1.346431            | 1.878058  | -0.492248 |
| C             | 3.855540             | 2.610240  | 1.516951  | -3.905007            | 2.579552  | -1.575248 | -3.915631            | 2.592309  | -1.548722 |
| C             | 1.569810             | 3.151402  | 0.967242  | -1.623237            | 3.168589  | -1.011836 | -1.625794            | 3.169056  | -1.001234 |
| C             | 2.799517             | 3.530517  | 1.484966  | -2.867224            | 3.512489  | -1.535796 | -2.872105            | 3.518764  | -1.516315 |
| H             | 4.827807             | 2.871086  | 1.923848  | -4.887106            | 2.816419  | -1.970380 | -4.899557            | 2.835637  | -1.935150 |
| H             | 0.749798             | 3.862274  | 0.974908  | -0.827665            | 3.906893  | -1.025378 | -0.828143            | 3.904960  | -1.019096 |
| H             | 2.950860             | 4.533853  | 1.873410  | -3.036122            | 4.514978  | -1.921523 | -3.038843            | 4.522574  | -1.899658 |
| C             | 3.480556             | -1.049172 | -0.303994 | -3.455667            | -1.021400 | 0.369053  | -3.457557            | -1.027144 | 0.362182  |
| C             | 3.540800             | -2.021314 | -1.310555 | -3.499909            | -1.980386 | 1.395237  | -3.492018            | -2.003746 | 1.371922  |
| C             | 4.687499             | -0.605799 | 0.259438  | -4.672660            | -0.614324 | -0.214248 | -4.679287            | -0.612600 | -0.204488 |
| C             | 4.761061             | -2.596860 | -1.668232 | -4.703952            | -2.583834 | 1.748747  | -4.692824            | -2.612094 | 1.726521  |
| H             | 2.630973             | -2.334208 | -1.808896 | -2.587530            | -2.245070 | 1.917290  | -2.574622            | -2.276918 | 1.880206  |
| C             | 5.907644             | -1.170223 | -0.097997 | -5.877429            | -1.218155 | 0.138351  | -5.880956            | -1.223756 | 0.146625  |
| C             | 5.943830             | -2.187723 | -1.052053 | -5.891717            | -2.219595 | 1.107797  | -5.886309            | -2.239268 | 1.100675  |
| H             | 4.779796             | -3.363058 | -2.438062 | -4.713468            | -3.330054 | 2.537911  | -4.695565            | -3.370199 | 2.504244  |
| H             | 6.810971             | -0.797627 | 0.374996  | -6.787195            | -0.882488 | -0.349416 | -6.794760            | -0.881353 | -0.328645 |
| H             | 6.893569             | -2.639122 | -1.324108 | -6.831011            | -2.692170 | 1.380074  | -6.822841            | -2.716924 | 1.373416  |
| O             | 4.689549             | 0.418662  | 1.176887  | -4.702657            | 0.388051  | -1.141388 | -4.718831            | 0.406333  | -1.113051 |
| C             | -2.491763            | 1.311326  | -0.686740 | 2.473912             | 1.307374  | 0.697024  | 2.481582             | 1.312104  | 0.684465  |
| C             | -3.613692            | 1.896368  | -1.308020 | 3.553848             | 1.799803  | 1.433083  | 3.567534             | 1.814758  | 1.409834  |
| C             | -1.273299            | 2.042746  | -0.574246 | 1.278642             | 2.072630  | 0.508079  | 1.283238             | 2.071350  | 0.503082  |
| C             | -3.552476            | 3.198489  | -1.784447 | 3.544200             | 3.115541  | 1.910254  | 3.552901             | 3.128463  | 1.884524  |
| C             | -1.259816            | 3.360184  | -1.084664 | 1.325635             | 3.405269  | 0.998324  | 1.323543             | 3.400868  | 0.995236  |
| C             | -2.373659            | 3.946205  | -1.669414 | 2.429330             | 3.924474  | 1.665355  | 2.429539             | 3.928839  | 1.652222  |
| H             | -4.425138            | 3.623999  | -2.274002 | 4.395903             | 3.491747  | 2.469852  | 4.406489             | 3.510959  | 2.437096  |
| H             | -0.330698            | 3.920560  | -1.044126 | 0.443044             | 4.027509  | 0.885302  | 0.435139             | 4.016378  | 0.891718  |
| H             | -2.326269            | 4.960893  | -2.055401 | 2.412421             | 4.951334  | 2.024178  | 2.407756             | 4.954802  | 2.013172  |
| C             | -3.747894            | -0.630952 | 0.254082  | 3.732118             | -0.615278 | -0.280237 | 3.738468             | -0.617992 | -0.274069 |
| C             | -4.806838            | 0.077628  | 0.835463  | 4.867500             | 0.103286  | -0.704869 | 4.869809             | 0.096538  | -0.712389 |
| C             | -3.826217            | -2.034842 | 0.232080  | 3.801601             | -2.027135 | -0.353436 | 3.803067             | -2.028199 | -0.333093 |
| C             | -5.949106            | -0.588773 | 1.282577  | 6.020008             | -0.559923 | -1.107551 | 6.022302             | -0.570675 | -1.110340 |

|                 |           |                      |           |           |                      |           |           |                      |           |
|-----------------|-----------|----------------------|-----------|-----------|----------------------|-----------|-----------|----------------------|-----------|
| C               | -4.959548 | -2.703596            | 0.683480  | 4.960980  | -2.693187            | -0.742520 | 4.961045  | -2.698559            | -0.719344 |
| C               | -6.037592 | -1.977331            | 1.190671  | 6.084216  | -1.959933            | -1.109840 | 6.084034  | -1.969556            | -1.096599 |
| H               | -6.764992 | -0.012996            | 1.710086  | 6.876740  | 0.024143             | -1.431401 | 6.878299  | 0.009117             | -1.443431 |
| H               | -4.973822 | -3.788073            | 0.635615  | 4.951295  | -3.778396            | -0.764392 | 4.950897  | -3.783853            | -0.731283 |
| H               | -6.927407 | -2.498780            | 1.531425  | 6.991268  | -2.472164            | -1.415378 | 6.989595  | -2.486348            | -1.399174 |
| O               | -2.770363 | -2.791305            | -0.223992 | 2.711969  | -2.807328            | -0.054872 | 2.711758  | -2.804118            | -0.027291 |
| H               | -4.520122 | 1.319437             | -1.449879 | 4.409597  | 1.166310             | 1.640179  | 4.426950  | 1.185548             | 1.614214  |
| H               | -4.741549 | 1.154896             | 0.931329  | 4.832835  | 1.185117             | -0.721199 | 4.833410  | 1.178045             | -0.743772 |
| <b>PTZPXZBN</b> |           | <b>S<sub>0</sub></b> |           |           | <b>S<sub>1</sub></b> |           |           | <b>T<sub>1</sub></b> |           |
| C               | -1.674826 | -2.182629            | -0.014474 | -1.633474 | -2.187422            | -0.101880 | -1.635124 | -2.181140            | -0.109717 |
| C               | -0.549517 | -2.982520            | -0.173374 | -0.494596 | -2.998816            | -0.163246 | -0.498185 | -2.997603            | -0.198438 |
| C               | 0.727550  | -2.420420            | -0.227532 | 0.759167  | -2.411428            | -0.150791 | 0.755048  | -2.402552            | -0.201164 |
| C               | 0.878658  | -1.031895            | -0.126685 | 0.882087  | -0.997934            | -0.070786 | 0.881950  | -0.996344            | -0.096356 |
| C               | -0.261830 | -0.202988            | 0.009342  | -0.257762 | -0.174822            | -0.005784 | -0.255774 | -0.162664            | -0.014030 |
| C               | -1.538892 | -0.793584            | 0.068810  | -1.512158 | -0.784677            | 0.001978  | -1.515699 | -0.783931            | -0.000617 |
| H               | -0.681179 | -4.057530            | -0.250731 | -0.615929 | -4.071707            | -0.265677 | -0.621142 | -4.068574            | -0.311651 |
| H               | 1.587751  | -3.066115            | -0.361047 | 1.640966  | -3.033629            | -0.248288 | 1.637011  | -3.022363            | -0.316209 |
| B               | -0.138505 | 1.308284             | 0.090241  | -0.140770 | 1.363759             | 0.044809  | -0.139748 | 1.356002             | 0.041790  |
| N               | 2.150892  | -0.426690            | -0.180227 | 2.138570  | -0.391496            | -0.108463 | 2.144890  | -0.391189            | -0.118728 |
| N               | -2.692375 | -0.011720            | 0.213446  | -2.676425 | -0.013788            | 0.132184  | -2.680612 | -0.010451            | 0.130885  |
| C               | 2.282952  | 0.926278             | -0.568549 | 2.284982  | 0.953775             | -0.587176 | 2.295219  | 0.955913             | -0.577022 |
| C               | 3.504640  | 1.337144             | -1.143020 | 3.495248  | 1.313638             | -1.186041 | 3.513415  | 1.325175             | -1.161780 |
| C               | 1.219460  | 1.856987             | -0.413318 | 1.215325  | 1.892944             | -0.438180 | 1.223868  | 1.891418             | -0.433617 |
| C               | 3.691689  | 2.663086             | -1.528466 | 3.723185  | 2.635330             | -1.605941 | 3.737784  | 2.647329             | -1.572762 |
| C               | 1.436487  | 3.177948             | -0.861650 | 1.485161  | 3.211229             | -0.890688 | 1.488828  | 3.208693             | -0.883164 |
| C               | 2.649792  | 3.586338             | -1.398622 | 2.705093  | 3.577544             | -1.447527 | 2.712884  | 3.583423             | -1.426638 |
| H               | 4.641732  | 2.962318             | -1.962268 | 4.677807  | 2.906365             | -2.045226 | 4.695548  | 2.925144             | -2.001245 |
| H               | 0.617685  | 3.888436             | -0.806120 | 0.694941  | 3.952835             | -0.826935 | 0.693895  | 3.945887             | -0.827263 |
| H               | 2.791625  | 4.610941             | -1.731437 | 2.868692  | 4.602020             | -1.774134 | 2.874208  | 4.608947             | -1.750903 |
| C               | 3.267767  | -1.051839            | 0.452044  | 3.248802  | -1.016688            | 0.511453  | 3.248557  | -1.026614            | 0.504087  |
| C               | 3.119333  | -1.789931            | 1.636400  | 3.095685  | -1.744700            | 1.705439  | 3.083086  | -1.769824            | 1.686484  |
| C               | 4.558769  | -0.873778            | -0.071230 | 4.540576  | -0.869329            | -0.031086 | 4.545199  | -0.873840            | -0.023459 |
| C               | 4.219387  | -2.402925            | 2.232086  | 4.184490  | -2.380817            | 2.292679  | 4.166340  | -2.412362            | 2.277378  |
| H               | 2.136121  | -1.893969            | 2.081365  | 2.117302  | -1.803439            | 2.169925  | 2.099376  | -1.836705            | 2.138123  |
| C               | 5.664595  | -1.468897            | 0.544657  | 5.633695  | -1.497049            | 0.576647  | 5.632676  | -1.508752            | 0.587075  |
| C               | 5.494460  | -2.255854            | 1.681783  | 5.455720  | -2.270547            | 1.721461  | 5.443377  | -2.295603            | 1.720758  |
| H               | 4.077380  | -2.984075            | 3.139145  | 4.042152  | -2.944919            | 3.210190  | 4.014417  | -2.988054            | 3.186118  |
| H               | 6.654593  | -1.309682            | 0.127012  | 6.623401  | -1.369882            | 0.147580  | 6.626484  | -1.376717            | 0.169064  |
| H               | 6.354371  | -2.730600            | 2.145874  | 6.309798  | -2.760447            | 2.180567  | 6.292639  | -2.791639            | 2.182185  |
| C               | -2.614849 | 1.297972             | 0.724416  | -2.606156 | 1.295549             | 0.728519  | -2.610568 | 1.298819             | 0.718119  |
| C               | -3.734240 | 1.864252             | 1.368014  | -3.690570 | 1.759959             | 1.476521  | -3.698290 | 1.769145             | 1.461820  |
| C               | -1.388645 | 2.024301             | 0.652033  | -1.405350 | 2.059725             | 0.589074  | -1.406284 | 2.057742             | 0.581982  |
| C               | -3.663004 | 3.140657             | 1.907750  | -3.674801 | 3.050097             | 2.019224  | -3.678883 | 3.056681             | 2.003942  |
| C               | -1.365944 | 3.314909             | 1.227346  | -1.443207 | 3.361261             | 1.150172  | -1.441858 | 3.358640             | 1.142533  |
| C               | -2.476594 | 3.882003             | 1.835576  | -2.550663 | 3.858181             | 1.831596  | -2.549320 | 3.859401             | 1.820016  |
| H               | -4.534036 | 3.549721             | 2.413922  | -4.530746 | 3.405562             | 2.585946  | -4.533601 | 3.415589             | 2.570204  |



|                 |           |                      |           |           |                      |           |           |                      |           |
|-----------------|-----------|----------------------|-----------|-----------|----------------------|-----------|-----------|----------------------|-----------|
| H               | -0.431384 | 3.867697             | 1.219008  | -0.552993 | 3.978800             | 1.080595  | -0.549229 | 3.973040             | 1.077315  |
| H               | -2.421534 | 4.875657             | 2.271883  | -2.527471 | 4.864583             | 2.243661  | -2.522517 | 4.864944             | 2.234010  |
| C               | -3.886995 | -0.599048            | -0.290938 | -3.864795 | -0.589705            | -0.324442 | -3.871820 | -0.589612            | -0.318861 |
| C               | -4.946372 | 0.134085             | -0.840129 | -4.999455 | 0.142887             | -0.727110 | -5.003860 | 0.143519             | -0.726170 |
| C               | -3.969449 | -2.002767            | -0.320963 | -3.933560 | -1.999516            | -0.443887 | -3.938140 | -1.998320            | -0.429556 |
| C               | -6.092972 | -0.511483            | -1.306072 | -6.150183 | -0.506875            | -1.154646 | -6.156908 | -0.506885            | -1.145591 |
| C               | -5.107492 | -2.650370            | -0.791110 | -5.092626 | -2.651993            | -0.857555 | -5.100286 | -2.651714            | -0.834809 |
| C               | -6.185450 | -1.902273            | -1.265476 | -6.213836 | -1.906403            | -1.203686 | -6.220952 | -1.906467            | -1.182049 |
| H               | -6.908944 | 0.082304             | -1.707957 | -7.006162 | 0.087033             | -1.461893 | -7.012452 | 0.085185             | -1.457096 |
| H               | -5.125179 | -3.735814            | -0.783961 | -5.083434 | -3.735825            | -0.914850 | -5.093131 | -3.735760            | -0.886095 |
| H               | -7.078472 | -2.407961            | -1.621198 | -7.119906 | -2.407763            | -1.529338 | -7.128322 | -2.409363            | -1.501864 |
| S               | 4.755770  | 0.132814             | -1.514371 | 4.757054  | 0.098746             | -1.490118 | 4.776950  | 0.113966             | -1.467652 |
| H               | -4.646618 | 1.290102             | 1.479029  | -4.553224 | 1.124667             | 1.644940  | -4.561658 | 1.135147             | 1.631087  |
| H               | -4.877486 | 1.213946             | -0.896631 | -4.964148 | 1.224648             | -0.709053 | -4.964228 | 1.225273             | -0.719864 |
| O               | -2.914579 | -2.781189            | 0.099799  | -2.847652 | -2.790130            | -0.165262 | -2.850924 | -2.786499            | -0.154737 |
| <b>DPAPXZBN</b> |           | <b>S<sub>0</sub></b> |           |           | <b>S<sub>1</sub></b> |           |           | <b>T<sub>1</sub></b> |           |
| C               | 1.252351  | -2.141083            | 0.418690  | 1.231133  | -2.167840            | 0.327281  | 1.234072  | -2.159373            | 0.344042  |
| C               | 0.067937  | -2.864591            | 0.469598  | 0.046028  | -2.888948            | 0.488216  | 0.052635  | -2.887145            | 0.498489  |
| C               | -1.167549 | -2.232388            | 0.334374  | -1.167116 | -2.227520            | 0.409702  | -1.164326 | -2.220687            | 0.400798  |
| C               | -1.223608 | -0.842396            | 0.127922  | -1.215285 | -0.823809            | 0.153120  | -1.215126 | -0.824063            | 0.145306  |
| C               | -0.020416 | -0.088060            | 0.096423  | -0.018427 | -0.077743            | 0.066112  | -0.019759 | -0.064837            | 0.059061  |
| C               | 1.212188  | -0.757855            | 0.234791  | 1.192177  | -0.764041            | 0.163710  | 1.196659  | -0.761348            | 0.165208  |
| H               | 0.118900  | -3.937546            | 0.629295  | 0.093370  | -3.962563            | 0.635708  | 0.100097  | -3.959946            | 0.646590  |
| H               | -2.066819 | -2.832128            | 0.379986  | -2.078375 | -2.800825            | 0.515006  | -2.075823 | -2.795460            | 0.498019  |
| B               | -0.033110 | 1.423527             | -0.038570 | -0.030674 | 1.453292             | -0.124671 | -0.034885 | 1.446196             | -0.122154 |
| N               | -2.445415 | -0.176872            | -0.038208 | -2.429034 | -0.180654            | -0.016140 | -2.434226 | -0.179027            | -0.019767 |
| N               | 2.426540  | -0.057864            | 0.185885  | 2.408964  | -0.069082            | 0.106997  | 2.414813  | -0.063122            | 0.095895  |
| C               | -2.546692 | 1.176824             | -0.396278 | -2.558693 | 1.189928             | -0.406140 | -2.566261 | 1.190282             | -0.394464 |
| C               | -3.818137 | 1.713836             | -0.708106 | -3.836749 | 1.687335             | -0.693590 | -3.847216 | 1.690560             | -0.676908 |
| C               | -1.393923 | 2.018988             | -0.454322 | -1.400947 | 2.031735             | -0.495117 | -1.411360 | 2.034157             | -0.479821 |
| C               | -3.946965 | 3.029149             | -1.126585 | -4.013548 | 3.013726             | -1.107841 | -4.023783 | 3.016788             | -1.081878 |
| C               | -1.579747 | 3.341692             | -0.918877 | -1.634933 | 3.356147             | -0.953282 | -1.645180 | 3.358218             | -0.928234 |
| C               | -2.822356 | 3.853998             | -1.257802 | -2.902557 | 3.845403             | -1.251302 | -2.913638 | 3.849759             | -1.222516 |
| H               | -4.936388 | 3.409399             | -1.369950 | -5.014904 | 3.375716             | -1.324892 | -5.025391 | 3.380380             | -1.295448 |
| H               | -0.705112 | 3.973804             | -1.034375 | -0.779539 | 4.007670             | -1.099500 | -0.790810 | 4.011954             | -1.070376 |
| H               | -2.923803 | 4.874772             | -1.616366 | -3.023957 | 4.870029             | -1.596328 | -3.035820 | 4.876289             | -1.561178 |
| C               | -3.653241 | -0.946846            | 0.113598  | -3.634064 | -0.954851            | 0.141049  | -3.636569 | -0.959025            | 0.132599  |
| C               | -4.203572 | -1.617443            | -0.983756 | -4.175425 | -1.644274            | -0.949059 | -4.175349 | -1.642591            | -0.962217 |
| C               | -4.268288 | -1.027896            | 1.366499  | -4.257504 | -1.014459            | 1.390977  | -4.258352 | -1.030613            | 1.382566  |
| C               | -5.370943 | -2.366206            | -0.825111 | -5.338594 | -2.397973            | -0.783719 | -5.336757 | -2.400018            | -0.802316 |
| H               | -3.716122 | -1.547617            | -1.951743 | -3.684512 | -1.585002            | -1.915963 | -3.684308 | -1.575466            | -1.928495 |
| C               | -5.435740 | -1.777706            | 1.519544  | -5.421030 | -1.769325            | 1.549950  | -5.420100 | -1.789239            | 1.535977  |
| C               | -5.988252 | -2.447215            | 0.425309  | -5.962522 | -2.461678            | 0.464485  | -5.960368 | -2.474459            | 0.445451  |
| H               | -5.796966 | -2.885634            | -1.679432 | -5.756619 | -2.934256            | -1.631553 | -5.753693 | -2.930792            | -1.654117 |
| H               | -5.912222 | -1.838185            | 2.494436  | -5.902902 | -1.815557            | 2.522959  | -5.901608 | -1.843880            | 2.508713  |
| H               | -6.897160 | -3.030625            | 0.546546  | -6.868363 | -3.048782            | 0.590563  | -6.864932 | -3.064405            | 0.567248  |

|   |           |           |           |           |           |           |           |           |           |
|---|-----------|-----------|-----------|-----------|-----------|-----------|-----------|-----------|-----------|
| C | 2.477703  | 1.318694  | 0.475034  | 2.454878  | 1.320763  | 0.483301  | 2.461804  | 1.323643  | 0.463349  |
| C | 3.675298  | 1.883196  | 0.959943  | 3.601896  | 1.808687  | 1.112432  | 3.617436  | 1.820257  | 1.076324  |
| C | 1.302246  | 2.116619  | 0.354271  | 1.299885  | 2.136063  | 0.261648  | 1.300543  | 2.133438  | 0.259396  |
| C | 3.730334  | 3.226125  | 1.305013  | 3.702552  | 3.163813  | 1.448332  | 3.712032  | 3.171729  | 1.416076  |
| C | 1.407430  | 3.470985  | 0.743551  | 1.457443  | 3.502848  | 0.617132  | 1.451255  | 3.496644  | 0.623464  |
| C | 2.592455  | 4.034225  | 1.197267  | 2.625160  | 4.011868  | 1.176239  | 2.622905  | 4.012340  | 1.167697  |
| H | 4.660480  | 3.636141  | 1.691232  | 4.605761  | 3.537469  | 1.922210  | 4.618508  | 3.550399  | 1.879698  |
| H | 0.515716  | 4.088367  | 0.717926  | 0.613271  | 4.171472  | 0.490070  | 0.599865  | 4.159200  | 0.514483  |
| H | 2.630336  | 5.080444  | 1.488886  | 2.686529  | 5.068247  | 1.429297  | 2.678851  | 5.067116  | 1.428341  |
| C | 3.543596  | -0.819865 | -0.254831 | 3.532826  | -0.793605 | -0.283989 | 3.540009  | -0.793940 | -0.286100 |
| C | 4.612245  | -0.287327 | -0.986828 | 4.689974  | -0.221567 | -0.854180 | 4.690177  | -0.228934 | -0.874562 |
| C | 3.529945  | -2.205965 | -0.016982 | 3.514788  | -2.204841 | -0.140456 | 3.519483  | -2.199774 | -0.119385 |
| C | 5.680954  | -1.096487 | -1.377049 | 5.777035  | -1.012541 | -1.195749 | 5.777060  | -1.023627 | -1.209603 |
| C | 4.588802  | -3.017475 | -0.412156 | 4.615698  | -2.996191 | -0.465014 | 4.618988  | -2.995088 | -0.439123 |
| C | 5.681705  | -2.458012 | -1.075652 | 5.757810  | -2.400967 | -0.985149 | 5.757845  | -2.407209 | -0.975446 |
| H | 6.508239  | -0.654357 | -1.924964 | 6.650064  | -0.543722 | -1.640573 | 6.646730  | -0.562266 | -1.668399 |
| H | 4.535313  | -4.080121 | -0.196184 | 4.542820  | -4.069010 | -0.317302 | 4.548501  | -4.065575 | -0.274676 |
| H | 6.514287  | -3.089560 | -1.372121 | 6.617424  | -3.010621 | -1.245339 | 6.615541  | -3.021557 | -1.231299 |
| H | -4.705052 | 1.096951  | -0.641254 | -4.709021 | 1.052735  | -0.603074 | -4.718673 | 1.054323  | -0.590172 |
| H | -3.829921 | -0.503757 | 2.210687  | -3.828959 | -0.470101 | 2.227301  | -3.830577 | -0.492086 | 2.223005  |
| H | 4.550713  | 1.261117  | 1.104877  | 4.422555  | 1.140467  | 1.349952  | 4.444457  | 1.156398  | 1.303033  |
| H | 4.612531  | 0.765698  | -1.242933 | 4.717465  | 0.845941  | -1.032312 | 4.712714  | 0.835123  | -1.073712 |
| O | 2.455772  | -2.799843 | 0.604953  | 2.402551  | -2.853061 | 0.322067  | 2.409267  | -2.841344 | 0.359656  |

**CzPXZBN**

|   | <b>S<sub>0</sub></b> |           |           | <b>S<sub>1</sub></b> |           |           | <b>T<sub>1</sub></b> |           |           |
|---|----------------------|-----------|-----------|----------------------|-----------|-----------|----------------------|-----------|-----------|
| C | -1.504536            | -2.171882 | 0.354284  | 1.471968             | -2.192066 | -0.264477 | -1.475502            | -2.189878 | 0.254080  |
| C | -0.409879            | -3.019119 | 0.311240  | 0.364680             | -3.047787 | -0.299948 | -0.370945            | -3.051948 | 0.274316  |
| C | 0.887462             | -2.510389 | 0.209157  | -0.906099            | -2.512513 | -0.241154 | 0.900679             | -2.509400 | 0.202318  |
| C | 1.091117             | -1.128109 | 0.158724  | -1.093122            | -1.102999 | -0.172304 | 1.092611             | -1.106998 | 0.150363  |
| C | -0.026485            | -0.240710 | 0.146799  | 0.021469             | -0.228675 | -0.114382 | -0.019280            | -0.219630 | 0.099001  |
| C | -1.323558            | -0.786255 | 0.246751  | 1.299999             | -0.798383 | -0.181977 | -1.303703            | -0.798704 | 0.173724  |
| H | -0.575874            | -4.090720 | 0.363630  | 0.526228             | -4.120148 | -0.315919 | -0.532631            | -4.123680 | 0.283330  |
| H | 1.704690             | -3.209665 | 0.120753  | -1.745139            | -3.187404 | -0.170954 | 1.739354             | -3.184654 | 0.122495  |
| B | 0.110210             | 1.274536  | -0.022314 | -0.113540            | 1.301641  | 0.099376  | 0.114938             | 1.293614  | -0.101925 |
| N | 2.367506             | -0.545071 | 0.067234  | -2.356583            | -0.537319 | -0.077641 | 2.363089             | -0.538952 | 0.069587  |
| N | -2.466686            | 0.024787  | 0.224614  | 2.448877             | 0.012298  | -0.139499 | -2.452309            | 0.013757  | 0.136915  |
| C | 2.532195             | 0.778619  | -0.338176 | -2.535593            | 0.793818  | 0.366092  | 2.545220             | 0.792894  | -0.359296 |
| C | 3.900320             | 1.037076  | -0.578155 | -3.898384            | 1.026663  | 0.601009  | 3.911216             | 1.029648  | -0.584172 |
| C | 1.515626             | 1.744016  | -0.462450 | -1.508833            | 1.756179  | 0.505483  | 1.522094             | 1.757322  | -0.496466 |
| C | 4.275920             | 2.298706  | -1.039270 | -4.307491            | 2.290532  | 1.070868  | 4.319442             | 2.295766  | -1.042208 |
| C | 1.945621             | 2.998340  | -0.946527 | -1.973610            | 3.015153  | 0.995197  | 1.984600             | 3.013455  | -0.976285 |
| C | 3.286154             | 3.268079  | -1.237825 | -3.320520            | 3.261829  | 1.270348  | 3.335069             | 3.265911  | -1.243980 |
| H | 5.318073             | 2.527460  | -1.247040 | -5.353205            | 2.505332  | 1.269449  | 5.366518             | 2.514039  | -1.231151 |
| H | 1.211708             | 3.781399  | -1.112167 | -1.253193            | 3.806923  | 1.177384  | 1.265246             | 3.806713  | -1.156106 |
| H | 3.566996             | 4.249001  | -1.612215 | -3.611867            | 4.241982  | 1.642864  | 3.626642             | 4.248707  | -1.608676 |
| C | 3.649687             | -1.122836 | 0.190525  | -3.636639            | -1.120498 | -0.224642 | 3.639270             | -1.121775 | 0.220553  |
| C | 4.058684             | -2.357117 | 0.708137  | -4.041033            | -2.330428 | -0.796643 | 4.038736             | -2.340258 | 0.781772  |

|   |           |           |           |           |           |           |           |           |           |
|---|-----------|-----------|-----------|-----------|-----------|-----------|-----------|-----------|-----------|
| C | 4.616126  | -0.172017 | -0.236657 | -4.602114 | -0.177733 | 0.228185  | 4.611632  | -0.178005 | -0.216735 |
| C | 5.423594  | -2.648568 | 0.727580  | -5.405846 | -2.629030 | -0.830660 | 5.401285  | -2.640468 | 0.822001  |
| H | 3.362420  | -3.068289 | 1.130716  | -3.344590 | -3.019315 | -1.256167 | 3.336946  | -3.032798 | 1.227448  |
| C | 5.977654  | -0.488199 | -0.213133 | -5.963215 | -0.500384 | 0.187666  | 5.971678  | -0.504079 | -0.171049 |
| C | 6.377644  | -1.736119 | 0.257244  | -6.358850 | -1.733061 | -0.327078 | 6.361161  | -1.742129 | 0.333227  |
| H | 5.746839  | -3.604942 | 1.130122  | -5.726190 | -3.568535 | -1.272649 | 5.717303  | -3.584594 | 1.257462  |
| H | 6.714022  | 0.239208  | -0.544447 | -6.703823 | 0.213528  | 0.538070  | 6.715942  | 0.211476  | -0.510443 |
| H | 7.432467  | -1.995440 | 0.281526  | -7.414087 | -1.990859 | -0.363963 | 7.415265  | -2.003558 | 0.374275  |
| C | -2.386586 | 1.399078  | 0.516072  | 2.371415  | 1.397420  | -0.520668 | -2.373083 | 1.396801  | 0.509238  |
| C | -3.516065 | 2.073886  | 1.022459  | 3.463081  | 1.991868  | -1.159390 | -3.467974 | 1.996587  | 1.142440  |
| C | -1.149532 | 2.086262  | 0.360019  | 1.157957  | 2.103378  | -0.288308 | -1.154372 | 2.098247  | 0.278624  |
| C | -3.442138 | 3.422728  | 1.338833  | 3.427702  | 3.351329  | -1.488493 | -3.431313 | 3.353810  | 1.468065  |
| C | -1.123987 | 3.456258  | 0.707268  | 1.172237  | 3.474066  | -0.633078 | -1.172055 | 3.472321  | 0.615540  |
| C | -2.243397 | 4.129209  | 1.174914  | 2.283549  | 4.096416  | -1.201026 | -2.282811 | 4.095652  | 1.178326  |
| H | -4.320297 | 3.920635  | 1.742724  | 4.286764  | 3.809876  | -1.970227 | -4.287920 | 3.815600  | 1.950637  |
| H | -0.182071 | 3.990567  | 0.636726  | 0.267664  | 4.054572  | -0.485111 | -0.267439 | 4.052808  | 0.468925  |
| H | -2.185996 | 5.182316  | 1.436614  | 2.245882  | 5.155306  | -1.446138 | -2.243586 | 5.154892  | 1.422107  |
| C | -3.654585 | -0.606645 | -0.242552 | 3.636274  | -0.591364 | 0.273869  | -3.644955 | -0.590779 | -0.266349 |
| C | -4.665531 | 0.055888  | -0.950095 | 4.729934  | 0.105661  | 0.827729  | -4.736468 | 0.107696  | -0.822174 |
| C | -3.779331 | -1.993768 | -0.057126 | 3.752920  | -2.000449 | 0.173789  | -3.760674 | -1.997162 | -0.157189 |
| C | -5.809549 | -0.628733 | -1.363664 | 5.889406  | -0.566782 | 1.187499  | -5.899870 | -0.562432 | -1.170944 |
| C | -4.914070 | -2.682403 | -0.473407 | 4.924623  | -2.672937 | 0.517201  | -4.938098 | -2.667439 | -0.487787 |
| C | -5.946728 | -1.993228 | -1.110076 | 6.004195  | -1.954597 | 1.015261  | -6.017101 | -1.948267 | -0.984381 |
| H | -6.588653 | -0.087065 | -1.892376 | 6.713057  | -0.003538 | 1.616261  | -6.722942 | -0.001052 | -1.602886 |
| H | -4.964894 | -3.752373 | -0.297023 | 4.954754  | -3.751685 | 0.402866  | -4.971849 | -3.745253 | -0.366761 |
| H | -6.838724 | -2.527236 | -1.424657 | 6.918841  | -2.470506 | 1.290062  | -6.934810 | -2.463498 | -1.250332 |
| H | -4.438796 | 1.534069  | 1.200741  | 4.341526  | 1.406642  | -1.408389 | -4.345410 | 1.411367  | 1.394844  |
| H | -4.562347 | 1.111766  | -1.170181 | 4.654551  | 1.174695  | 0.979273  | -4.654734 | 1.174414  | -0.986257 |
| O | -2.763430 | -2.712961 | 0.529979  | 2.705513  | -2.764711 | -0.257428 | -2.711369 | -2.760399 | 0.265972  |

**DMACPXZBN**

|   | $S_0$     |           |           | $S_1$     |           |           | $T_1$     |           |           |
|---|-----------|-----------|-----------|-----------|-----------|-----------|-----------|-----------|-----------|
| C | 0.516859  | -2.438261 | 0.004078  | 0.544461  | -2.425860 | 0.066577  | 0.539556  | -2.419981 | 0.018742  |
| C | -0.766842 | -2.987307 | 0.014390  | -0.713104 | -3.003313 | 0.020398  | -0.719168 | -3.004134 | -0.010876 |
| C | -1.890360 | -2.174011 | 0.098098  | -1.845420 | -2.180926 | 0.006246  | -1.849724 | -2.174669 | 0.000170  |
| C | -1.744002 | -0.784705 | 0.145150  | -1.713304 | -0.776279 | 0.066652  | -1.718852 | -0.775562 | 0.063136  |
| C | -0.460414 | -0.206479 | 0.127405  | -0.454562 | -0.176380 | 0.088730  | -0.453557 | -0.165089 | 0.078662  |
| C | 0.679144  | -1.047412 | 0.073109  | 0.681003  | -1.010132 | 0.105710  | 0.680009  | -1.011331 | 0.079808  |
| H | 1.373526  | -3.097252 | -0.073090 | 1.421777  | -3.060359 | 0.026758  | 1.417255  | -3.053550 | -0.037192 |
| H | -0.905020 | -4.063059 | -0.038536 | -0.839923 | -4.078041 | -0.052103 | -0.847910 | -4.077294 | -0.092448 |
| B | -0.325341 | 1.305984  | 0.155804  | -0.323411 | 1.360971  | 0.087561  | -0.322350 | 1.351978  | 0.084062  |
| N | -2.895958 | 0.011281  | 0.205154  | -2.874195 | 0.008703  | 0.120115  | -2.880051 | 0.013278  | 0.116660  |
| N | 1.951186  | -0.447736 | 0.052915  | 1.938390  | -0.413620 | 0.099653  | 1.943356  | -0.415650 | 0.087841  |
| C | -2.830384 | 1.337295  | 0.675871  | -2.814621 | 1.337205  | 0.675432  | -2.819683 | 1.340806  | 0.662834  |
| C | -3.973377 | 1.931546  | 1.248471  | -3.922569 | 1.833096  | 1.365482  | -3.931066 | 1.843936  | 1.347300  |
| C | -1.595541 | 2.050672  | 0.636870  | -1.601219 | 2.086322  | 0.555055  | -1.602150 | 2.083406  | 0.548773  |
| C | -3.916538 | 3.224034  | 1.750817  | -3.918251 | 3.141449  | 1.864307  | -3.921301 | 3.148560  | 1.847692  |
| C | -1.588195 | 3.357267  | 1.174698  | -1.652726 | 3.408603  | 1.068195  | -1.648940 | 3.403332  | 1.064781  |

|                  |           |                      |           |                      |           |                      |           |           |           |
|------------------|-----------|----------------------|-----------|----------------------|-----------|----------------------|-----------|-----------|-----------|
| C                | -2.720992 | 3.952396             | 1.712135  | -2.781015            | 3.934794  | 1.690059             | -2.776992 | 3.934661  | 1.681713  |
| H                | -4.806687 | 3.655657             | 2.202106  | -4.792069            | 3.521982  | 2.385607             | -4.794011 | 3.533268  | 2.367677  |
| H                | -0.649241 | 3.901866             | 1.195522  | -0.756793            | 4.018750  | 1.011590             | -0.749293 | 4.008485  | 1.015722  |
| H                | -2.676292 | 4.958510             | 2.120344  | -2.765430            | 4.955064  | 2.067283             | -2.756371 | 4.953189  | 2.063335  |
| C                | -4.069366 | -0.581719            | -0.338896 | -4.048075            | -0.571243 | -0.364770            | -4.057634 | -0.569718 | -0.360209 |
| C                | -4.164908 | -1.985168            | -0.328013 | -4.126881            | -1.984053 | -0.439921            | -4.135113 | -1.981087 | -0.424159 |
| C                | -5.093536 | 0.142089             | -0.962435 | -5.158990            | 0.157382  | -0.836726            | -5.165007 | 0.159229  | -0.838069 |
| C                | -5.285059 | -2.637575            | -0.833298 | -5.275125            | -2.639605 | -0.878337            | -5.287236 | -2.637133 | -0.853387 |
| C                | -6.222609 | -0.508201            | -1.463523 | -6.297569            | -0.496133 | -1.289296            | -6.306876 | -0.494521 | -1.281415 |
| C                | -6.331046 | -1.896092            | -1.383801 | -6.373701            | -1.896261 | -1.294633            | -6.384738 | -1.894135 | -1.271940 |
| H                | -5.314308 | -3.722043            | -0.791998 | -5.274881            | -3.724828 | -0.898655            | -5.290025 | -3.722363 | -0.866025 |
| H                | -7.012116 | 0.079508             | -1.923176 | -7.134384            | 0.094668  | -1.650677            | -7.142703 | 0.094257  | -1.647946 |
| H                | -7.210802 | -2.405328            | -1.766597 | -7.271094            | -2.400125 | -1.639876            | -7.284000 | -2.399305 | -1.610550 |
| C                | 2.124363  | 0.883899             | -0.377642 | 2.133866             | 0.914562  | -0.406936            | 2.141978  | 0.913782  | -0.399383 |
| C                | 3.398746  | 1.239387             | -0.882959 | 3.402808             | 1.215939  | -0.923632            | 3.416960  | 1.223302  | -0.904118 |
| C                | 1.058903  | 1.823294             | -0.298238 | 1.064165             | 1.859705  | -0.339877            | 1.072774  | 1.857610  | -0.333263 |
| C                | 3.605281  | 2.568215             | -1.251080 | 3.650472             | 2.540334  | -1.326923            | 3.663834  | 2.549017  | -1.293511 |
| C                | 1.325027  | 3.139387             | -0.730346 | 1.379068             | 3.169849  | -0.781586            | 1.385815  | 3.168055  | -0.766481 |
| C                | 2.580096  | 3.518658             | -1.180030 | 2.644132             | 3.506085  | -1.244789            | 2.654303  | 3.511538  | -1.216453 |
| H                | 4.570604  | 2.876770             | -1.636652 | 4.621492             | 2.822168  | -1.715584            | 4.637507  | 2.836409  | -1.671774 |
| H                | 0.519263  | 3.866992             | -0.726135 | 0.599054             | 3.925050  | -0.779087            | 0.603906  | 3.921302  | -0.767090 |
| H                | 2.768122  | 4.540047             | -1.500765 | 2.852827             | 4.524301  | -1.566684            | 2.862906  | 4.531971  | -1.531058 |
| C                | 3.084899  | -1.072093            | 0.645609  | 3.057415             | -1.032427 | 0.703717             | 3.057612  | -1.043532 | 0.693490  |
| C                | 4.361244  | -0.778025            | 0.128883  | 4.338530             | -0.777173 | 0.171303             | 4.342868  | -0.783517 | 0.174657  |
| C                | 2.950407  | -1.874043            | 1.788996  | 2.908305             | -1.797013 | 1.873938             | 2.898467  | -1.822723 | 1.852148  |
| C                | 5.476189  | -1.332374            | 0.769259  | 5.440445             | -1.340102 | 0.824625             | 5.439614  | -1.355081 | 0.829512  |
| C                | 4.074224  | -2.427386            | 2.395272  | 4.020629             | -2.358505 | 2.491266             | 4.005802  | -2.391442 | 2.472147  |
| H                | 1.967667  | -2.050898            | 2.210800  | 1.924496             | -1.921171 | 2.313072             | 1.910459  | -1.954684 | 2.279084  |
| C                | 5.343774  | -2.161093            | 1.883152  | 5.292645             | -2.134052 | 1.963141             | 5.282321  | -2.161976 | 1.957364  |
| H                | 6.471532  | -1.119849            | 0.395830  | 6.439680             | -1.162620 | 0.443707             | 6.441865  | -1.174032 | 0.458229  |
| H                | 3.953729  | -3.048140            | 3.279324  | 3.893179             | -2.944818 | 3.397353             | 3.870421  | -2.989143 | 3.369624  |
| H                | 6.228133  | -2.584493            | 2.351753  | 6.170227             | -2.559698 | 2.442348             | 6.155621  | -2.594589 | 2.438154  |
| C                | 4.436754  | 0.130263             | -1.099448 | 4.427621             | 0.083884  | -1.088694            | 4.442641  | 0.093029  | -1.074092 |
| C                | 5.851309  | 0.684991             | -1.329327 | 5.852103             | 0.609447  | -1.329059            | 5.868868  | 0.621268  | -1.297103 |
| H                | 5.881335  | 1.309622             | -2.225947 | 5.892507             | 1.204222  | -2.245003            | 5.917175  | 1.226178  | -2.206038 |
| H                | 6.203606  | 1.280528             | -0.481251 | 6.207867             | 1.228759  | -0.499871            | 6.217863  | 1.231086  | -0.458029 |
| H                | 6.561706  | -0.128799            | -1.497782 | 6.552595             | -0.218774 | -1.467560            | 6.570376  | -0.205462 | -1.438988 |
| C                | 4.037890  | -0.687534            | -2.361996 | 4.029674             | -0.778577 | -2.321975            | 4.053534  | -0.754171 | -2.320636 |
| H                | 4.053435  | -0.043625            | -3.247892 | 4.055372             | -0.166538 | -3.229701            | 4.087965  | -0.132052 | -3.221228 |
| H                | 4.747094  | -1.507881            | -2.517620 | 4.730447             | -1.611953 | -2.445726            | 4.754233  | -1.587055 | -2.447567 |
| H                | 3.037056  | -1.115913            | -2.272671 | 3.022903             | -1.191309 | -2.223485            | 3.045472  | -1.166563 | -2.235260 |
| H                | -4.894785 | 1.367509             | 1.334606  | -4.795495            | 1.208789  | 1.522253             | -4.806011 | 1.222327  | 1.502956  |
| H                | -5.011266 | 1.219035             | -1.048924 | -5.113498            | 1.238805  | -0.851880            | -5.113847 | 1.240152  | -0.866856 |
| O                | -3.140977 | -2.758376            | 0.170733  | -3.061803            | -2.774561 | -0.090291            | -3.069218 | -2.769524 | -0.076944 |
| <b>TMCzPXZBN</b> |           | <b>S<sub>0</sub></b> |           | <b>S<sub>1</sub></b> |           | <b>T<sub>1</sub></b> |           |           |           |
| C                | -1.903796 | -2.282757            | 0.252717  | -1.873135            | -2.296620 | 0.147337             | -1.876175 | -2.293163 | 0.141243  |

|   |           |           |           |           |           |           |           |           |           |
|---|-----------|-----------|-----------|-----------|-----------|-----------|-----------|-----------|-----------|
| C | -0.808797 | -3.127429 | 0.173347  | -0.767647 | -3.154557 | 0.139305  | -0.772910 | -3.156439 | 0.118055  |
| C | 0.489319  | -2.614912 | 0.115179  | 0.504590  | -2.618424 | 0.126456  | 0.500147  | -2.612408 | 0.090870  |
| C | 0.693880  | -1.231593 | 0.145413  | 0.693762  | -1.208290 | 0.147477  | 0.693565  | -1.210087 | 0.125155  |
| C | -0.423459 | -0.343379 | 0.175217  | -0.419508 | -0.328516 | 0.136038  | -0.417504 | -0.318213 | 0.120591  |
| C | -1.721377 | -0.893762 | 0.228896  | -1.698797 | -0.899497 | 0.155897  | -1.702585 | -0.899014 | 0.148956  |
| H | -0.975885 | -4.200115 | 0.162106  | -0.930428 | -4.225573 | 0.087270  | -0.935841 | -4.226500 | 0.060948  |
| H | 1.307875  | -3.308243 | -0.002920 | 1.343776  | -3.288952 | 0.023812  | 1.339117  | -3.282710 | -0.020927 |
| B | -0.284745 | 1.180121  | 0.104953  | -0.281115 | 1.212978  | 0.029869  | -0.280481 | 1.205071  | 0.023229  |
| N | 1.969447  | -0.645897 | 0.100185  | 1.957716  | -0.640537 | 0.101018  | 1.964020  | -0.640714 | 0.089772  |
| N | -2.864803 | -0.082078 | 0.241824  | -2.846863 | -0.087463 | 0.160481  | -2.850611 | -0.085500 | 0.157995  |
| C | 2.136014  | 0.701752  | -0.213718 | 2.140857  | 0.718381  | -0.244893 | 2.149653  | 0.716905  | -0.243275 |
| C | 3.504795  | 0.979887  | -0.421417 | 3.504295  | 0.970340  | -0.446818 | 3.515478  | 0.971896  | -0.435963 |
| C | 1.126024  | 1.675756  | -0.285205 | 1.121557  | 1.692129  | -0.327204 | 1.132898  | 1.692815  | -0.323855 |
| C | 3.881771  | 2.268874  | -0.789760 | 3.916363  | 2.263300  | -0.817751 | 3.925903  | 2.266707  | -0.797611 |
| C | 1.564530  | 2.959454  | -0.677664 | 1.595083  | 2.979915  | -0.718655 | 1.603175  | 2.976397  | -0.707075 |
| C | 2.906201  | 3.270990  | -0.941134 | 2.944600  | 3.267062  | -0.968046 | 2.957119  | 3.268470  | -0.950065 |
| H | 4.928960  | 2.504446  | -0.967142 | 4.966973  | 2.485314  | -0.984219 | 4.977281  | 2.491300  | -0.956381 |
| H | 0.826714  | 3.748042  | -0.795866 | 0.872069  | 3.780334  | -0.848226 | 0.881104  | 3.778307  | -0.833794 |
| C | 3.253182  | -1.227944 | 0.191024  | 3.237426  | -1.231129 | 0.214956  | 3.240612  | -1.230975 | 0.208193  |
| C | 3.671015  | -2.491497 | 0.622441  | 3.648307  | -2.476885 | 0.698378  | 3.647164  | -2.483378 | 0.682043  |
| C | 4.220433  | -0.250102 | -0.158007 | 4.205973  | -0.258831 | -0.154724 | 4.214865  | -0.258933 | -0.147995 |
| C | 5.036372  | -2.773197 | 0.632395  | 5.012720  | -2.768072 | 0.723471  | 5.009562  | -2.776141 | 0.712959  |
| H | 2.980421  | -3.238110 | 0.990090  | 2.955693  | -3.204713 | 1.100435  | 2.949832  | -3.213560 | 1.071400  |
| C | 5.582871  | -0.562388 | -0.143366 | 5.566996  | -0.579988 | -0.122836 | 5.575199  | -0.583294 | -0.111452 |
| C | 6.010512  | -1.836248 | 0.237349  | 5.987877  | -1.844348 | 0.299136  | 5.990611  | -1.851217 | 0.302005  |
| H | 5.355577  | -3.755865 | 0.972215  | 5.327392  | -3.737884 | 1.101372  | 5.320491  | -3.749552 | 1.084961  |
| H | 6.312980  | 0.195890  | -0.416016 | 6.302974  | 0.166312  | -0.411818 | 6.314288  | 0.163625  | -0.390969 |
| C | -2.789232 | 1.271410  | 0.619298  | -2.771347 | 1.268623  | 0.632637  | -2.773414 | 1.269530  | 0.619862  |
| C | -3.925755 | 1.913630  | 1.151619  | -3.868730 | 1.821532  | 1.298531  | -3.873531 | 1.829171  | 1.280354  |
| C | -1.550373 | 1.966155  | 0.523391  | -1.554496 | 1.987150  | 0.458567  | -1.551686 | 1.983185  | 0.446462  |
| C | -3.856683 | 3.239761  | 1.553783  | -3.836286 | 3.156163  | 1.716665  | -3.838819 | 3.162072  | 1.694284  |
| C | -1.529939 | 3.310993  | 0.957860  | -1.573025 | 3.333634  | 0.891622  | -1.571814 | 3.333005  | 0.872465  |
| C | -2.655767 | 3.953952  | 1.452059  | -2.688837 | 3.917699  | 1.488932  | -2.686669 | 3.919677  | 1.464710  |
| H | -4.740615 | 3.711725  | 1.975890  | -4.699478 | 3.582838  | 2.219844  | -4.699638 | 3.592598  | 2.197905  |
| H | -0.587158 | 3.847848  | 0.934029  | -0.667050 | 3.921880  | 0.790416  | -0.665289 | 3.920331  | 0.772462  |
| H | -2.601947 | 4.988268  | 1.780995  | -2.653361 | 4.958217  | 1.803547  | -2.648822 | 4.960648  | 1.777813  |
| C | -4.046133 | -0.683592 | -0.277549 | -4.031773 | -0.661133 | -0.302515 | -4.040788 | -0.662047 | -0.293896 |
| C | -5.047938 | 0.020518  | -0.957460 | -5.119141 | 0.071941  | -0.820594 | -5.126079 | 0.071063  | -0.815292 |
| C | -4.173177 | -2.079307 | -0.176489 | -4.150541 | -2.072871 | -0.295776 | -4.158094 | -2.071619 | -0.275712 |
| C | -6.186400 | -0.637497 | -1.426033 | -6.275745 | -0.573867 | -1.235259 | -6.286439 | -0.574405 | -1.218360 |
| C | -5.302247 | -2.741115 | -0.648125 | -5.318675 | -2.720078 | -0.694621 | -5.331249 | -2.718764 | -0.661820 |
| C | -6.326619 | -2.014607 | -1.256150 | -6.393158 | -1.969517 | -1.155604 | -6.405574 | -1.968816 | -1.122819 |
| H | -6.958718 | -0.064751 | -1.931472 | -7.094625 | 0.017574  | -1.634261 | -7.105053 | 0.014482  | -1.621303 |
| H | -5.355350 | -3.819650 | -0.536282 | -5.350382 | -3.804006 | -0.651560 | -5.365982 | -3.802155 | -0.610581 |
| H | -7.214358 | -2.528389 | -1.613587 | -7.305252 | -2.465436 | -1.472543 | -7.320323 | -2.465652 | -1.430770 |
| H | -4.850740 | 1.364162  | 1.282416  | -4.749758 | 1.221988  | 1.499892  | -4.754161 | 1.230317  | 1.485239  |

|                 |           |                      |           |           |                      |           |           |                      |           |
|-----------------|-----------|----------------------|-----------|-----------|----------------------|-----------|-----------|----------------------|-----------|
| H               | -4.942007 | 1.087610             | -1.112665 | -5.041610 | 1.148579             | -0.900651 | -5.042886 | 1.146179             | -0.909197 |
| O               | -3.165417 | -2.832309            | 0.381105  | -3.107125 | -2.865168            | 0.095272  | -3.112420 | -2.861482            | 0.109719  |
| C               | 3.310510  | 4.659045             | -1.379428 | 3.358173  | 4.649557             | -1.417635 | 3.362835  | 4.655392             | -1.392082 |
| H               | 3.680020  | 4.660447             | -2.412799 | 3.497828  | 4.689083             | -2.506375 | 3.239571  | 4.778669             | -2.476576 |
| H               | 2.468821  | 5.355945             | -1.330002 | 2.604840  | 5.399996             | -1.158335 | 2.751946  | 5.426348             | -0.910231 |
| H               | 4.114542  | 5.060806             | -0.751471 | 4.307361  | 4.953181             | -0.961971 | 4.412370  | 4.862026             | -1.159087 |
| C               | 7.473875  | -2.205984            | 0.236653  | 7.450238  | -2.215933            | 0.315675  | 7.451864  | -2.227127            | 0.326819  |
| H               | 7.712757  | -2.887408            | -0.590205 | 7.690555  | -2.922946            | -0.489309 | 7.689899  | -2.954518            | -0.460309 |
| H               | 8.110577  | -1.322928            | 0.128311  | 8.089355  | -1.337995            | 0.183070  | 8.093565  | -1.354559            | 0.173068  |
| H               | 7.760398  | -2.715240            | 1.163875  | 7.731849  | -2.698550            | 1.258708  | 7.732521  | -2.687110            | 1.281550  |
| <b>PXZPTZBN</b> |           | <b>S<sub>0</sub></b> |           |           | <b>S<sub>1</sub></b> |           |           | <b>T<sub>1</sub></b> |           |
| C               | -1.424699 | -2.175514            | 0.201400  | -1.387893 | -2.196722            | 0.092764  | -1.386088 | -2.187326            | 0.097406  |
| C               | -0.288807 | -2.960821            | -0.016241 | -0.228214 | -2.986660            | 0.000347  | -0.231877 | -2.982070            | -0.035736 |
| C               | 0.975557  | -2.395045            | -0.143023 | 1.018105  | -2.390969            | -0.064755 | 1.015193  | -2.380188            | -0.118754 |
| C               | 1.124054  | -1.001453            | -0.050957 | 1.133211  | -0.979142            | -0.008979 | 1.131718  | -0.976820            | -0.030357 |
| C               | -0.021216 | -0.175172            | 0.098367  | -0.017250 | -0.161644            | 0.057992  | -0.015806 | -0.148528            | 0.055880  |
| C               | -1.295097 | -0.779558            | 0.215118  | -1.274192 | -0.782963            | 0.123070  | -1.277015 | -0.778131            | 0.128351  |
| H               | -0.395856 | -4.040122            | -0.079474 | -0.317293 | -4.066135            | -0.068486 | -0.324639 | -4.059635            | -0.117056 |
| H               | 1.826422  | -3.037791            | -0.331861 | 1.893728  | -3.012955            | -0.203662 | 1.888788  | -2.999189            | -0.284360 |
| B               | 0.098507  | 1.341211             | 0.143557  | 0.096543  | 1.380594             | 0.057345  | 0.096842  | 1.376197             | 0.062526  |
| N               | 2.379101  | -0.385680            | -0.145312 | 2.379821  | -0.358759            | -0.084751 | 2.386753  | -0.353817            | -0.089327 |
| N               | -2.445939 | 0.021551             | 0.329960  | -2.422573 | 0.025255             | 0.234293  | -2.428144 | 0.027482             | 0.244159  |
| C               | 2.497678  | 0.965646             | -0.524408 | 2.510515  | 0.978425             | -0.570653 | 2.519877  | 0.985065             | -0.555833 |
| C               | 3.726859  | 1.372599             | -1.077673 | 3.732977  | 1.334511             | -1.140988 | 3.750014  | 1.352907             | -1.109159 |
| C               | 1.437065  | 1.894719             | -0.394035 | 1.439815  | 1.909325             | -0.476365 | 1.444047  | 1.911994             | -0.462568 |
| C               | 3.919913  | 2.673816             | -1.512369 | 3.959572  | 2.620626             | -1.634463 | 3.974016  | 2.641352             | -1.596647 |
| C               | 1.657561  | 3.209683             | -0.866027 | 1.698683  | 3.204264             | -0.987548 | 1.703287  | 3.208697             | -0.964040 |
| C               | 2.870494  | 3.597354             | -1.416025 | 2.923749  | 3.553311             | -1.551447 | 2.931916  | 3.565814             | -1.518079 |
| H               | 4.877986  | 2.942182             | -1.947012 | 4.926586  | 2.861523             | -2.063152 | 4.944197  | 2.890436             | -2.012981 |
| H               | 0.841307  | 3.923692             | -0.823558 | 0.901501  | 3.940961             | -0.965109 | 0.904907  | 3.943941             | -0.942645 |
| H               | 3.013841  | 4.610746             | -1.780666 | 3.079578  | 4.558779             | -1.934876 | 3.084897  | 4.574184             | -1.894984 |
| C               | 3.592706  | -1.025923            | 0.231169  | 3.580567  | -0.984330            | 0.312316  | 3.579956  | -0.991334            | 0.303160  |
| C               | 3.685224  | -2.015252            | 1.218237  | 3.662942  | -1.937219            | 1.341316  | 3.648557  | -1.973803            | 1.306162  |
| C               | 4.779761  | -0.575979            | -0.367618 | 4.775696  | -0.577227            | -0.313812 | 4.783225  | -0.573232            | -0.301021 |
| C               | 4.914657  | -2.603301            | 1.518887  | 4.879779  | -2.537300            | 1.655529  | 4.859988  | -2.584201            | 1.616218  |
| H               | 2.793415  | -2.331702            | 1.746006  | 2.769865  | -2.201580            | 1.895856  | 2.748916  | -2.248826            | 1.844083  |
| C               | 6.009330  | -1.153939            | -0.067843 | 5.993305  | -1.177217            | -0.000824 | 5.995471  | -1.188576            | 0.004157  |
| C               | 6.075294  | -2.189297            | 0.864723  | 6.043565  | -2.174488            | 0.971683  | 6.032016  | -2.209387            | 0.951199  |
| H               | 4.958470  | -3.382677            | 2.274249  | 4.917886  | -3.279926            | 2.447246  | 4.888964  | -3.345740            | 2.389990  |
| H               | 6.896479  | -0.776266            | -0.566644 | 6.884905  | -0.841267            | -0.520905 | 6.892876  | -0.843619            | -0.499558 |
| H               | 7.032043  | -2.650368            | 1.092316  | 6.992679  | -2.644479            | 1.212646  | 6.976707  | -2.689451            | 1.189233  |
| C               | -2.352285 | 1.345741             | 0.818388  | -2.314038 | 1.329446             | 0.840003  | -2.325183 | 1.335897             | 0.826885  |
| C               | -3.477720 | 1.920239             | 1.440417  | -3.375519 | 1.791398             | 1.620683  | -3.399434 | 1.816186             | 1.584154  |
| C               | -1.132420 | 2.069237             | 0.729963  | -1.125245 | 2.094892             | 0.649463  | -1.130459 | 2.094179             | 0.649735  |
| C               | -3.407913 | 3.203389             | 1.964861  | -3.343564 | 3.082493             | 2.158193  | -3.364258 | 3.106730             | 2.115240  |
| C               | -1.104878 | 3.366180             | 1.290722  | -1.144346 | 3.402631             | 1.203488  | -1.144883 | 3.400800             | 1.202338  |

|               |           |                      |           |           |                      |           |           |                      |           |
|---------------|-----------|----------------------|-----------|-----------|----------------------|-----------|-----------|----------------------|-----------|
| C             | -2.216675 | 3.938063             | 1.893148  | -2.226187 | 3.893796             | 1.925323  | -2.233582 | 3.905622             | 1.903771  |
| H             | -4.281486 | 3.624078             | 2.456815  | -4.178746 | 3.440687             | 2.753462  | -4.206307 | 3.475444             | 2.694395  |
| H             | -0.171281 | 3.920604             | 1.270646  | -0.262115 | 4.025984             | 1.089907  | -0.254265 | 4.014644             | 1.103554  |
| H             | -2.161210 | 4.935864             | 2.320161  | -2.192793 | 4.901867             | 2.333083  | -2.196461 | 4.913498             | 2.311551  |
| C             | -3.625566 | -0.411085            | -0.351351 | -3.630953 | -0.377910            | -0.346950 | -3.637269 | -0.385490            | -0.342875 |
| C             | -4.386380 | 0.481201             | -1.122459 | -4.527408 | 0.560371             | -0.905917 | -4.516255 | 0.543569             | -0.937841 |
| C             | -4.002829 | -1.764860            | -0.325226 | -3.987251 | -1.747798            | -0.429148 | -3.992465 | -1.752253            | -0.397917 |
| C             | -5.540874 | 0.052417             | -1.773962 | -5.729410 | 0.157235             | -1.464988 | -5.716136 | 0.133844             | -1.501021 |
| C             | -5.147721 | -2.195720            | -1.003180 | -5.210299 | -2.144482            | -0.991214 | -5.207052 | -2.157838            | -0.969140 |
| C             | -5.934229 | -1.285193            | -1.706024 | -6.089381 | -1.198890            | -1.498471 | -6.078439 | -1.219673            | -1.506555 |
| H             | -6.122791 | 0.767317             | -2.349182 | -6.388813 | 0.906079             | -1.894903 | -6.367793 | 0.875181             | -1.955033 |
| H             | -5.414622 | -3.248292            | -0.975903 | -5.453305 | -3.202392            | -1.036676 | -5.452168 | -3.215815            | -0.997050 |
| H             | -6.832290 | -1.623954            | -2.214871 | -7.032493 | -1.511328            | -1.936309 | -7.017775 | -1.539960            | -1.947269 |
| H             | -4.394764 | 1.348580             | 1.533834  | -4.237270 | 1.155548             | 1.798839  | -4.268328 | 1.187897             | 1.753341  |
| H             | -4.077467 | 1.517515             | -1.199616 | -4.259060 | 1.609438             | -0.898978 | -4.241029 | 1.590980             | -0.953597 |
| O             | 4.754455  | 0.469888             | -1.259748 | 4.772883  | 0.424998             | -1.242730 | 4.795628  | 0.454146             | -1.200201 |
| S             | -2.993097 | -2.919295            | 0.565035  | -2.928709 | -2.997237            | 0.200403  | -2.927468 | -2.989788            | 0.258804  |
| <b>2PTZBN</b> |           | <b>S<sub>0</sub></b> |           |           | <b>S<sub>1</sub></b> |           |           | <b>T<sub>1</sub></b> |           |
| C             | 1.563069  | -2.173997            | -0.104902 | 1.523186  | -2.189344            | -0.022480 | -1.524724 | -2.180283            | 0.004944  |
| C             | 0.423996  | -2.954195            | 0.118060  | 0.360047  | -2.980872            | 0.061938  | -0.365265 | -2.976016            | -0.111010 |
| C             | -0.840770 | -2.382991            | 0.222536  | -0.884413 | -2.383859            | 0.103911  | 0.879931  | -2.372867            | -0.165794 |
| C             | -0.983245 | -0.992206            | 0.106851  | -0.993839 | -0.970030            | 0.042849  | 0.993910  | -0.966699            | -0.073671 |
| C             | 0.159580  | -0.174181            | -0.067076 | 0.153272  | -0.157785            | -0.044240 | -0.150887 | -0.144006            | 0.031029  |
| C             | 1.433490  | -0.779280            | -0.163713 | 1.411019  | -0.779688            | -0.087789 | -1.414041 | -0.773922            | 0.076017  |
| H             | 0.529222  | -4.032170            | 0.202815  | 0.449321  | -4.059322            | 0.145404  | -0.457298 | -4.052422            | -0.208060 |
| H             | -1.701056 | -3.017335            | 0.401910  | -1.768698 | -2.998342            | 0.225236  | 1.762912  | -2.985510            | -0.307933 |
| B             | 0.024560  | 1.334902             | -0.194579 | 0.025198  | 1.380451             | -0.107771 | -0.021803 | 1.375598             | 0.107389  |
| N             | -2.249898 | -0.385659            | 0.188899  | -2.246669 | -0.358820            | 0.122658  | 2.253765  | -0.356427            | -0.131049 |
| N             | 2.579523  | 0.022072             | -0.315408 | 2.556118  | 0.031640             | -0.215859 | -2.559538 | 0.036388             | 0.210830  |
| C             | -2.372699 | 0.975957             | 0.547330  | -2.376257 | 0.984884             | 0.604293  | 2.390485  | 0.990428             | -0.589714 |
| C             | -3.572992 | 1.400164             | 1.155744  | -3.564066 | 1.349174             | 1.244775  | 3.587859  | 1.365211             | -1.212628 |
| C             | -1.316838 | 1.900570             | 0.328963  | -1.312800 | 1.918891             | 0.415352  | 1.324866  | 1.920900             | -0.404275 |
| C             | -3.747578 | 2.736594             | 1.509250  | -3.773456 | 2.673527             | 1.663531  | 3.795152  | 2.691512             | -1.619291 |
| C             | -1.520054 | 3.235216             | 0.742232  | -1.561266 | 3.240857             | 0.866087  | 1.570810  | 3.243297             | -0.846252 |
| C             | -2.713954 | 3.657368             | 1.310697  | -2.760814 | 3.613652             | 1.462412  | 2.775818  | 3.625285             | -1.427493 |
| H             | -4.680672 | 3.047689             | 1.970568  | -4.710765 | 2.949256             | 2.136134  | 4.736994  | 2.975028             | -2.078345 |
| H             | -0.705462 | 3.944473             | 0.633741  | -0.771394 | 3.979359             | 0.766965  | 0.777009  | 3.978169             | -0.752272 |
| H             | -2.846800 | 4.691627             | 1.616196  | -2.911990 | 4.640561             | 1.787275  | 2.925822  | 4.654354             | -1.745779 |
| C             | -3.391278 | -1.029508            | -0.381011 | -3.380979 | -0.978603            | -0.461244 | 3.379295  | -0.991722            | 0.452364  |
| C             | -3.288325 | -1.791832            | -1.554495 | -3.274071 | -1.695443            | -1.666440 | 3.255710  | -1.734136            | 1.640426  |
| C             | -4.659880 | -0.842577            | 0.190951  | -4.651606 | -0.830841            | 0.127887  | 4.657251  | -0.836425            | -0.118554 |
| C             | -4.408864 | -2.423609            | -2.089192 | -4.385915 | -2.322740            | -2.219671 | 4.359283  | -2.375041            | 2.194060  |
| H             | -2.324320 | -1.900070            | -2.038797 | -2.313021 | -1.754773            | -2.165761 | 2.288095  | -1.802046            | 2.125387  |
| C             | -5.786992 | -1.458288            | -0.363339 | -5.768794 | -1.448436            | -0.445573 | 5.765755  | -1.470460            | 0.454198  |
| C             | -5.659952 | -2.270964            | -1.487788 | -5.635306 | -2.213000            | -1.602380 | 5.616308  | -2.257451            | 1.593551  |
| H             | -4.302205 | -3.023797            | -2.988600 | -4.278627 | -2.879572            | -3.146391 | 4.239407  | -2.950108            | 3.107969  |

|                 |           |                      |           |           |                      |           |           |                      |           |
|-----------------|-----------|----------------------|-----------|-----------|----------------------|-----------|-----------|----------------------|-----------|
| H               | -6.759709 | -1.293190            | 0.090930  | -6.741996 | -1.320168            | 0.019437  | 6.744615  | -1.336663            | 0.002847  |
| H               | -6.535893 | -2.760493            | -1.904067 | -6.507238 | -2.696033            | -2.034478 | 6.481482  | -2.752414            | 2.025654  |
| C               | 2.476771  | 1.320932             | -0.865059 | 2.444483  | 1.310966             | -0.877257 | -2.450245 | 1.316528             | 0.860000  |
| C               | 3.600890  | 1.874926             | -1.508527 | 3.507603  | 1.742079             | -1.673208 | -3.521700 | 1.758958             | 1.643367  |
| C               | 1.249785  | 2.038929             | -0.819429 | 1.250020  | 2.074518             | -0.732123 | -1.249594 | 2.073190             | 0.725711  |
| C               | 3.522960  | 3.128921             | -2.097764 | 3.468031  | 3.004534             | -2.275051 | -3.478343 | 3.017848             | 2.245815  |
| C               | 1.214872  | 3.305141             | -1.446660 | 1.258790  | 3.348320             | -1.354752 | -1.256436 | 3.346106             | 1.349138  |
| C               | 2.324849  | 3.855613             | -2.071275 | 2.342160  | 3.814228             | -2.093951 | -2.342895 | 3.818806             | 2.077776  |
| H               | 4.395932  | 3.531639             | -2.605568 | 4.305472  | 3.340256             | -2.880205 | -4.317943 | 3.359121             | 2.844766  |
| H               | 0.276322  | 3.851462             | -1.460605 | 0.369276  | 3.967069             | -1.280736 | -0.361852 | 3.958554             | 1.285582  |
| H               | 2.263245  | 4.829502             | -2.549480 | 2.301352  | 4.799446             | -2.553313 | -2.298565 | 4.802296             | 2.540501  |
| C               | 3.763465  | -0.379053            | 0.377110  | 3.763115  | -0.350403            | 0.376633  | -3.773142 | -0.352525            | -0.373334 |
| C               | 4.525430  | 0.545688             | 1.107602  | 4.663015  | 0.608055             | 0.895556  | -4.664786 | 0.603120             | -0.907903 |
| C               | 4.142422  | -1.732406            | 0.405365  | 4.117446  | -1.717837            | 0.512636  | -4.128803 | -1.718240            | -0.487092 |
| C               | 5.683192  | 0.146086             | 1.771672  | 5.864093  | 0.225032             | 1.469216  | -5.871564 | 0.218496             | -1.469921 |
| C               | 5.290692  | -2.132798            | 1.096290  | 5.341547  | -2.093251            | 1.088196  | -5.357148 | -2.096149            | -1.051203 |
| C               | 6.078271  | -1.192635            | 1.757653  | 6.221712  | -1.129668            | 1.556678  | -6.235227 | -1.134919            | -1.529811 |
| H               | 6.266243  | 0.884948             | 2.314532  | 6.525298  | 0.988911             | 1.868636  | -6.529737 | 0.978577             | -1.881138 |
| H               | 5.559384  | -3.185128            | 1.112031  | 5.583615  | -3.148691            | 1.175166  | -5.604388 | -3.151459            | -1.122914 |
| H               | 6.978640  | -1.508784            | 2.276856  | 7.164592  | -1.425672            | 2.006102  | -7.181830 | -1.434372            | -1.969303 |
| S               | -4.805047 | 0.205137             | 1.610506  | -4.811907 | 0.132793             | 1.598522  | 4.841203  | 0.156886             | -1.566190 |
| H               | 4.523401  | 1.307766             | -1.568929 | 4.375412  | 1.105744             | -1.815995 | -4.393543 | 1.127183             | 1.780596  |
| H               | 4.214474  | 1.583672             | 1.143092  | 4.395966  | 1.656336             | 0.848134  | -4.388588 | 1.649876             | -0.881792 |
| S               | 3.134872  | -2.927057            | -0.432795 | 3.064753  | -2.992658            | -0.068840 | -3.064888 | -2.988687            | 0.089697  |
| <b>DPAPTZBN</b> |           | <b>S<sub>0</sub></b> |           |           | <b>S<sub>1</sub></b> |           |           | <b>T<sub>1</sub></b> |           |
| C               | 1.158204  | -2.098211            | 0.554530  | -1.130323 | -2.133772            | -0.464402 | 1.133432  | -2.123463            | 0.476696  |
| C               | -0.038844 | -2.819891            | 0.542635  | 0.078800  | -2.836107            | -0.611251 | -0.070667 | -2.832313            | 0.617936  |
| C               | -1.265559 | -2.197614            | 0.345246  | 1.286100  | -2.180129            | -0.472623 | -1.282666 | -2.174299            | 0.461836  |
| C               | -1.318228 | -0.804545            | 0.142402  | 1.321856  | -0.785506            | -0.183054 | -1.322050 | -0.785287            | 0.174634  |
| C               | -0.116679 | -0.047524            | 0.150370  | 0.119005  | -0.043773            | -0.116074 | -0.121442 | -0.030800            | 0.109029  |
| C               | 1.116247  | -0.716065            | 0.334592  | -1.096748 | -0.732797            | -0.251223 | 1.100646  | -0.726732            | 0.247274  |
| H               | -0.011239 | -3.893685            | 0.706149  | 0.063086  | -3.906728            | -0.790524 | -0.053350 | -3.901839            | 0.799427  |
| H               | -2.163781 | -2.800616            | 0.346722  | 2.200611  | -2.751335            | -0.559471 | -2.196219 | -2.748366            | 0.541351  |
| B               | -0.147521 | 1.467999             | 0.043090  | 0.146141  | 1.487246             | 0.068158  | -0.153016 | 1.483806             | -0.061525 |
| N               | -2.537646 | -0.151556            | -0.062656 | 2.532311  | -0.149665            | 0.038874  | -2.537875 | -0.149304            | -0.041681 |
| N               | 2.321735  | 0.009722             | 0.281326  | -2.295408 | 0.005500             | -0.173039 | 2.299423  | 0.012051             | 0.159929  |
| C               | -2.642959 | 1.206625             | -0.404884 | 2.657445  | 1.214062             | 0.447178  | -2.668199 | 1.215468             | -0.429548 |
| C               | -3.907229 | 1.734593             | -0.756882 | 3.924077  | 1.702830             | 0.795865  | -3.939044 | 1.706035             | -0.769416 |
| C               | -1.498484 | 2.059504             | -0.403915 | 1.504330  | 2.060914             | 0.488883  | -1.518591 | 2.065826             | -0.466038 |
| C               | -4.033839 | 3.056783             | -1.153915 | 4.087336  | 3.027227             | 1.219637  | -4.105383 | 3.032157             | -1.178385 |
| C               | -1.679828 | 3.390463             | -0.846541 | 1.721632  | 3.384560             | 0.952740  | -1.739130 | 3.390822             | -0.915436 |
| C               | -2.914243 | 3.896209             | -1.222495 | 2.976906  | 3.867272             | 1.309142  | -2.996886 | 3.875043             | -1.263723 |
| H               | -5.016831 | 3.431789             | -1.429143 | 5.079317  | 3.383106             | 1.484953  | -5.098692 | 3.389333             | -1.437016 |
| H               | -0.808189 | 4.033607             | -0.913488 | 0.862807  | 4.040612             | 1.054144  | -0.882666 | 4.050416             | -1.012999 |
| H               | -3.013764 | 4.923480             | -1.562561 | 3.089276  | 4.891792             | 1.657327  | -3.112235 | 4.902539             | -1.601704 |
| C               | -3.744447 | -0.933053            | 0.039639  | 3.738943  | -0.927902            | -0.082513 | -3.740826 | -0.935517            | 0.071105  |



|                |           |                      |           |           |                      |           |           |                      |           |
|----------------|-----------|----------------------|-----------|-----------|----------------------|-----------|-----------|----------------------|-----------|
| C              | -4.249605 | -1.597440            | -1.082720 | 4.232654  | -1.638423            | 1.016622  | -4.228836 | -1.637457            | -1.035749 |
| C              | -4.403512 | -1.028034            | 1.268765  | 4.414123  | -0.967891            | -1.306095 | -4.415767 | -0.992039            | 1.293968  |
| C              | -5.416351 | -2.355732            | -0.972353 | 5.399859  | -2.392812            | 0.886826  | -5.392647 | -2.398457            | -0.914971 |
| H              | -3.727888 | -1.516185            | -2.031761 | 3.701802  | -1.594832            | 1.963048  | -3.696754 | -1.581993            | -1.980812 |
| C              | -5.570117 | -1.787409            | 1.373210  | 5.581527  | -1.723306            | -1.429680 | -5.579698 | -1.754188            | 1.408264  |
| C              | -6.077706 | -2.451609            | 0.254282  | 6.075501  | -2.436477            | -0.335038 | -6.069289 | -2.457972            | 0.305671  |
| H              | -5.807337 | -2.871028            | -1.845677 | 5.780887  | -2.944967            | 1.741901  | -5.770120 | -2.943471            | -1.776136 |
| H              | -6.080907 | -1.859477            | 2.329736  | 6.103703  | -1.753669            | -2.382330 | -6.102521 | -1.797105            | 2.360043  |
| H              | -6.985982 | -3.042521            | 0.337876  | 6.984559  | -3.023923            | -0.433479 | -6.975679 | -3.050623            | 0.397024  |
| C              | 2.342237  | 1.388216             | 0.592020  | -2.300149 | 1.378303             | -0.618127 | 2.308180  | 1.383671             | 0.591227  |
| C              | 3.540801  | 1.953364             | 1.070552  | -3.426932 | 1.848024             | -1.296007 | 3.448467  | 1.865228             | 1.244147  |
| C              | 1.162109  | 2.173591             | 0.490252  | -1.147906 | 2.187995             | -0.395144 | 1.147095  | 2.186994             | 0.391941  |
| C              | 3.583596  | 3.287224             | 1.450416  | -3.500200 | 3.186832             | -1.694171 | 3.517031  | 3.200193             | 1.645527  |
| C              | 1.249569  | 3.518102             | 0.917883  | -1.272320 | 3.538880             | -0.816450 | 1.267132  | 3.534863             | 0.819581  |
| C              | 2.431173  | 4.080337             | 1.381380  | -2.416996 | 4.033397             | -1.432907 | 2.419100  | 4.037423             | 1.414494  |
| H              | 4.513000  | 3.701827             | 1.833298  | -4.385724 | 3.552097             | -2.206576 | 4.409162  | 3.571730             | 2.141736  |
| H              | 0.351096  | 4.126584             | 0.909878  | -0.424212 | 4.203379             | -0.689258 | 0.410265  | 4.191885             | 0.714837  |
| H              | 2.458203  | 5.117624             | 1.704717  | -2.458351 | 5.077384             | -1.736531 | 2.456137  | 5.079481             | 1.725025  |
| C              | 3.431000  | -0.603658            | -0.375158 | -3.443040 | -0.556453            | 0.381284  | 3.450523  | -0.559540            | -0.387813 |
| C              | 4.202487  | 0.102707             | -1.310798 | -4.378613 | 0.231807             | 1.092917  | 4.371298  | 0.216857             | -1.127457 |
| C              | 3.722736  | -1.960533            | -0.151116 | -3.709582 | -1.949477            | 0.274411  | 3.719297  | -1.945118            | -0.248166 |
| C              | 5.288172  | -0.503675            | -1.939293 | -5.525520 | -0.327928            | 1.626397  | 5.519447  | -0.348616            | -1.655171 |
| C              | 4.796340  | -2.572463            | -0.805984 | -4.886570 | -2.501463            | 0.808317  | 4.893936  | -2.504115            | -0.777993 |
| C              | 5.597310  | -1.840248            | -1.680405 | -5.798255 | -1.699409            | 1.474754  | 5.798033  | -1.713037            | -1.469574 |
| H              | 5.881938  | 0.070043             | -2.645707 | -6.212363 | 0.303964             | 2.182418  | 6.198821  | 0.272200             | -2.232307 |
| H              | 4.997761  | -3.624316            | -0.624299 | -5.064156 | -3.568346            | 0.705770  | 5.077314  | -3.567548            | -0.652958 |
| H              | 6.441133  | -2.317329            | -2.171006 | -6.700986 | -2.133121            | 1.893768  | 6.699870  | -2.153772            | -1.883529 |
| H              | -4.789023 | 1.107234             | -0.737265 | 4.796368  | 1.063825             | 0.744289  | -4.809229 | 1.063839             | -0.722923 |
| H              | -3.999819 | -0.508054            | 2.132576  | 4.022271  | -0.407583            | -2.149854 | -4.027025 | -0.439312            | 2.144093  |
| H              | 4.426393  | 1.335545             | 1.172588  | -4.254608 | 1.177820             | -1.506504 | 4.284630  | 1.201148             | 1.438804  |
| H              | 3.956502  | 1.134979             | -1.533677 | -4.176059 | 1.287092             | 1.227216  | 4.158769  | 1.266687             | -1.288239 |
| S              | 2.697601  | -2.879797            | 0.966539  | -2.619932 | -3.018407            | -0.576450 | 2.628050  | -3.000830            | 0.625177  |
| <b>CzPTZBN</b> |           | <b>S<sub>0</sub></b> |           |           | <b>S<sub>1</sub></b> |           |           | <b>T<sub>1</sub></b> |           |
| C              | 1.406186  | -2.135916            | -0.465243 | 1.367115  | -2.168319            | -0.388205 | 1.371099  | -2.165107            | -0.363374 |
| C              | 0.303563  | -2.980575            | -0.353194 | 0.238207  | -3.012120            | -0.394673 | 0.245462  | -3.014748            | -0.354775 |
| C              | -0.985561 | -2.478146            | -0.191350 | -1.025357 | -2.476456            | -0.275388 | -1.020040 | -2.474421            | -0.227386 |
| C              | -1.191740 | -1.093449            | -0.158783 | -1.204131 | -1.069886            | -0.191889 | -1.205050 | -1.074115            | -0.163364 |
| C              | -0.076948 | -0.203808            | -0.188388 | -0.084139 | -0.199141            | -0.157339 | -0.087667 | -0.190488            | -0.135942 |
| C              | 1.221587  | -0.749616            | -0.325925 | 1.199533  | -0.773741            | -0.260982 | 1.202087  | -0.770845            | -0.240150 |
| H              | 0.450668  | -4.055669            | -0.401997 | 0.370818  | -4.088571            | -0.432385 | 0.379737  | -4.090601            | -0.383554 |
| H              | -1.796087 | -3.176883            | -0.051874 | -1.862311 | -3.150270            | -0.176206 | -1.855489 | -3.149409            | -0.118362 |
| B              | -0.231201 | 1.315947             | -0.061520 | -0.230022 | 1.332763             | 0.040230  | -0.236110 | 1.326586             | 0.043580  |
| N              | -2.468329 | -0.521951            | -0.042568 | -2.467566 | -0.507084            | -0.060154 | -2.475315 | -0.510106            | -0.049593 |
| N              | 2.353034  | 0.086255             | -0.303123 | 2.327040  | 0.075798             | -0.205727 | 2.328726  | 0.078813             | -0.194791 |
| C              | -2.636562 | 0.809839             | 0.334404  | -2.639651 | 0.821810             | 0.388104  | -2.653356 | 0.821469             | 0.379172  |
| C              | -3.999068 | 1.061182             | 0.607550  | -3.994976 | 1.051679             | 0.665488  | -4.012697 | 1.054085             | 0.643056  |

|   |           |           |           |           |           |           |           |           |           |
|---|-----------|-----------|-----------|-----------|-----------|-----------|-----------|-----------|-----------|
| C | -1.626915 | 1.786091  | 0.402095  | -1.614419 | 1.787361  | 0.487693  | -1.632495 | 1.789892  | 0.475902  |
| C | -4.373540 | 2.331525  | 1.043934  | -4.391196 | 2.317257  | 1.140866  | -4.411149 | 2.323031  | 1.101719  |
| C | -2.054325 | 3.051246  | 0.860716  | -2.064085 | 3.048083  | 0.979478  | -2.082879 | 3.049777  | 0.953453  |
| C | -3.388071 | 3.316249  | 1.183687  | -3.402841 | 3.293532  | 1.298588  | -3.425933 | 3.299919  | 1.261034  |
| H | -5.411261 | 2.556638  | 1.276193  | -5.430602 | 2.530778  | 1.371905  | -5.452834 | 2.539424  | 1.320538  |
| H | -1.323254 | 3.845398  | 0.979683  | -1.339792 | 3.844147  | 1.125346  | -1.360579 | 3.847977  | 1.097332  |
| H | -3.668471 | 4.305085  | 1.536933  | -3.685311 | 4.276123  | 1.671351  | -3.710823 | 4.285707  | 1.622822  |
| C | -3.749816 | -1.115020 | -0.116219 | -3.749802 | -1.094618 | -0.166736 | -3.753542 | -1.099282 | -0.161417 |
| C | -4.162399 | -2.362772 | -0.596453 | -4.169837 | -2.305182 | -0.727507 | -4.165648 | -2.319877 | -0.709332 |
| C | -4.712058 | -0.163286 | 0.317046  | -4.705092 | -0.155830 | 0.316168  | -4.717446 | -0.158648 | 0.301522  |
| C | -5.524797 | -2.666117 | -0.570188 | -5.533775 | -2.607555 | -0.719081 | -5.527596 | -2.625364 | -0.708957 |
| H | -3.472909 | -3.076924 | -1.024820 | -3.487048 | -2.991436 | -1.210572 | -3.475596 | -3.010319 | -1.175799 |
| C | -6.070738 | -0.490879 | 0.339824  | -6.065824 | -0.482537 | 0.317897  | -6.076916 | -0.489915 | 0.296382  |
| C | -6.472868 | -1.752129 | -0.091692 | -6.473972 | -1.715781 | -0.184654 | -6.476462 | -1.730469 | -0.193482 |
| H | -5.850645 | -3.633414 | -0.943305 | -5.864767 | -3.547338 | -1.152684 | -5.852296 | -3.571289 | -1.134035 |
| H | -6.803573 | 0.237728  | 0.676116  | -6.796997 | 0.229502  | 0.691295  | -6.813471 | 0.223993  | 0.655504  |
| H | -7.525571 | -2.020666 | -0.079935 | -7.528977 | -1.977028 | -0.188830 | -7.530260 | -1.996101 | -0.203116 |
| C | 2.243982  | 1.455971  | -0.632397 | 2.212816  | 1.440689  | -0.658826 | 2.213791  | 1.441663  | -0.636960 |
| C | 3.376441  | 2.125715  | -1.135569 | 3.288554  | 2.009606  | -1.344588 | 3.296539  | 2.020047  | -1.309581 |
| C | 1.003230  | 2.133450  | -0.504460 | 1.003480  | 2.144755  | -0.427145 | 0.996744  | 2.140034  | -0.415133 |
| C | 3.291815  | 3.461563  | -1.500987 | 3.232336  | 3.350130  | -1.739644 | 3.237271  | 3.357181  | -1.704397 |
| C | 0.961732  | 3.488955  | -0.904071 | 0.992498  | 3.497298  | -0.839707 | 0.987589  | 3.495179  | -0.823427 |
| C | 2.079136  | 4.155141  | -1.386236 | 2.083948  | 4.097043  | -1.466251 | 2.080605  | 4.098546  | -1.439114 |
| H | 4.170648  | 3.958970  | -1.903893 | 4.076643  | 3.795091  | -2.258797 | 4.081641  | 3.806410  | -2.219436 |
| H | 0.013738  | 4.015643  | -0.857987 | 0.087340  | 4.078091  | -0.693259 | 0.079358  | 4.072954  | -0.685490 |
| H | 2.012365  | 5.196342  | -1.690279 | 2.030694  | 5.141642  | -1.764513 | 2.024682  | 5.142638  | -1.738829 |
| C | 3.521327  | -0.393274 | 0.367939  | 3.519633  | -0.361052 | 0.373094  | 3.533122  | -0.361745 | 0.366283  |
| C | 4.219129  | 0.418066  | 1.275934  | 4.364004  | 0.531594  | 1.073410  | 4.372394  | 0.527820  | 1.074774  |
| C | 3.949806  | -1.718940 | 0.186676  | 3.922603  | -1.721127 | 0.302768  | 3.940030  | -1.716001 | 0.271807  |
| C | 5.364614  | -0.052424 | 1.914164  | 5.559167  | 0.101095  | 1.622946  | 5.578177  | 0.100817  | 1.603840  |
| C | 5.085620  | -2.195442 | 0.849202  | 5.144077  | -2.142433 | 0.853432  | 5.173035  | -2.133670 | 0.799198  |
| C | 5.811057  | -1.356521 | 1.692557  | 5.968240  | -1.237405 | 1.502844  | 5.997178  | -1.230687 | 1.451776  |
| H | 5.897765  | 0.601311  | 2.598932  | 6.176394  | 0.810889  | 2.166207  | 6.193852  | 0.805719  | 2.154894  |
| H | 5.392865  | -3.226507 | 0.699775  | 5.425043  | -3.188967 | 0.778948  | 5.462146  | -3.176495 | 0.707034  |
| H | 6.702800  | -1.727336 | 2.190060  | 6.907706  | -1.568847 | 1.934153  | 6.945057  | -1.561287 | 1.865236  |
| H | 4.310574  | 1.589330  | -1.262256 | 4.173312  | 1.419707  | -1.562550 | 4.183836  | 1.432992  | -1.524102 |
| H | 3.868598  | 1.425310  | 1.470695  | 4.056572  | 1.563560  | 1.186104  | 4.053053  | 1.553402  | 1.210892  |
| S | 3.006995  | -2.779018 | -0.875753 | 2.935149  | -2.914648 | -0.506654 | 2.937323  | -2.909629 | -0.519845 |

**DMACPTZBN**

|   | $S_0$     |           |           | $S_1$     |           |          | $T_1$     |           |           |
|---|-----------|-----------|-----------|-----------|-----------|----------|-----------|-----------|-----------|
| C | 0.630255  | -2.407885 | 0.006809  | 0.671518  | -2.399084 | 0.110987 | 0.666281  | -2.392645 | 0.054739  |
| C | -0.645104 | -2.961325 | 0.065111  | -0.579910 | -2.983156 | 0.116419 | -0.587472 | -2.981463 | 0.074587  |
| C | -1.783482 | -2.162890 | 0.213650  | -1.736878 | -2.178669 | 0.126317 | -1.741028 | -2.170335 | 0.111811  |
| C | -1.638398 | -0.768958 | 0.240451  | -1.610960 | -0.768415 | 0.151021 | -1.615628 | -0.763482 | 0.139253  |
| C | -0.354391 | -0.180878 | 0.189075  | -0.346546 | -0.159205 | 0.140912 | -0.344848 | -0.147277 | 0.126639  |
| C | 0.787309  | -1.015011 | 0.095298  | 0.796871  | -0.984010 | 0.136068 | 0.796208  | -0.984585 | 0.105414  |
| H | 1.487475  | -3.058842 | -0.117763 | 1.551695  | -3.027585 | 0.046017 | 1.545454  | -3.021144 | -0.028187 |

|   |           |           |           |           |           |           |           |           |           |
|---|-----------|-----------|-----------|-----------|-----------|-----------|-----------|-----------|-----------|
| H | -0.759783 | -4.039910 | 0.002256  | -0.676687 | -4.062750 | 0.060459  | -0.687372 | -4.059498 | 0.008410  |
| B | -0.206300 | 1.330576  | 0.268964  | -0.203352 | 1.377698  | 0.155216  | -0.199735 | 1.371174  | 0.155106  |
| N | -2.781218 | 0.049393  | 0.307770  | -2.751384 | 0.058057  | 0.202337  | -2.756128 | 0.063678  | 0.195340  |
| N | 2.056869  | -0.418489 | 0.050515  | 2.053173  | -0.384997 | 0.093715  | 2.058636  | -0.386823 | 0.081789  |
| C | -2.689702 | 1.364146  | 0.822269  | -2.652506 | 1.356316  | 0.828415  | -2.658397 | 1.362007  | 0.809469  |
| C | -3.837041 | 1.947480  | 1.394472  | -3.741382 | 1.820085  | 1.568586  | -3.755302 | 1.837930  | 1.535584  |
| C | -1.453644 | 2.066965  | 0.814029  | -1.444559 | 2.103948  | 0.704815  | -1.443675 | 2.101207  | 0.699862  |
| C | -3.773843 | 3.217735  | 1.950095  | -3.714802 | 3.101410  | 2.130709  | -3.723088 | 3.114407  | 2.100839  |
| C | -1.434490 | 3.349209  | 1.408025  | -1.468476 | 3.399154  | 1.284276  | -1.463227 | 3.393656  | 1.283587  |
| C | -2.567054 | 3.929696  | 1.961775  | -2.575300 | 3.896119  | 1.965509  | -2.572556 | 3.898371  | 1.953385  |
| H | -4.665704 | 3.644338  | 2.402629  | -4.571696 | 3.463027  | 2.692099  | -4.581960 | 3.482138  | 2.655133  |
| H | -0.491327 | 3.885332  | 1.454585  | -0.572128 | 4.009252  | 1.225588  | -0.560773 | 3.995706  | 1.238527  |
| H | -2.516290 | 4.916019  | 2.415305  | -2.543526 | 4.895792  | 2.393602  | -2.535715 | 4.895293  | 2.387371  |
| C | -3.931262 | -0.358039 | -0.434915 | -3.936662 | -0.330559 | -0.426196 | -3.948595 | -0.330956 | -0.424467 |
| C | -4.325867 | -1.707455 | -0.445203 | -4.299984 | -1.698675 | -0.535420 | -4.315075 | -1.696472 | -0.510629 |
| C | -4.643042 | 0.553674  | -1.229883 | -4.805893 | 0.619932  | -1.009527 | -4.808335 | 0.616482  | -1.023267 |
| C | -5.440932 | -2.114676 | -1.184760 | -5.503941 | -2.079853 | -1.148705 | -5.524200 | -2.079190 | -1.112258 |
| C | -5.769275 | 0.148092  | -1.942816 | -5.985967 | 0.230620  | -1.620490 | -5.994962 | 0.226496  | -1.622457 |
| C | -6.181032 | -1.185358 | -1.913013 | -6.354080 | -1.123183 | -1.681934 | -6.371096 | -1.124909 | -1.655952 |
| H | -5.721676 | -3.164005 | -1.184777 | -5.753601 | -3.135185 | -1.213095 | -5.780555 | -3.133687 | -1.160685 |
| H | -6.313937 | 0.877815  | -2.535687 | -6.622290 | 0.987997  | -2.069685 | -6.627351 | 0.979859  | -2.083532 |
| H | -7.056854 | -1.506275 | -2.469956 | -7.280932 | -1.424002 | -2.160586 | -7.302371 | -1.428399 | -2.124489 |
| C | 2.223191  | 0.924358  | -0.346377 | 2.234828  | 0.941607  | -0.415848 | 2.246215  | 0.943270  | -0.404340 |
| C | 3.480639  | 1.289991  | -0.884800 | 3.486771  | 1.246896  | -0.971007 | 3.505124  | 1.256790  | -0.945140 |
| C | 1.164881  | 1.861891  | -0.202336 | 1.169249  | 1.883466  | -0.311503 | 1.181534  | 1.884301  | -0.297278 |
| C | 3.680152  | 2.629604  | -1.215293 | 3.719202  | 2.573857  | -1.372965 | 3.738969  | 2.586508  | -1.328539 |
| C | 1.421815  | 3.192079  | -0.595760 | 1.465675  | 3.197045  | -0.752079 | 1.478695  | 3.199894  | -0.722932 |
| C | 2.662819  | 3.581276  | -1.074486 | 2.715579  | 3.538507  | -1.252459 | 2.733030  | 3.548555  | -1.208776 |
| H | 4.632441  | 2.947639  | -1.624758 | 4.677105  | 2.859380  | -1.790785 | 4.700342  | 2.878075  | -1.734327 |
| H | 0.619820  | 3.921608  | -0.537939 | 0.684175  | 3.950301  | -0.716284 | 0.696461  | 3.952321  | -0.686901 |
| H | 2.845575  | 4.612569  | -1.365135 | 2.913819  | 4.559189  | -1.573037 | 2.932718  | 4.572500  | -1.517578 |
| C | 3.210364  | -1.064183 | 0.583115  | 3.192565  | -1.002504 | 0.662947  | 3.191521  | -1.017379 | 0.650426  |
| C | 4.467324  | -0.762679 | 0.025642  | 4.455868  | -0.746639 | 0.090172  | 4.460473  | -0.755947 | 0.093236  |
| C | 3.114256  | -1.891723 | 1.711682  | 3.082751  | -1.762163 | 1.840339  | 3.068475  | -1.797611 | 1.812759  |
| C | 5.602073  | -1.341889 | 0.606591  | 5.579287  | -1.305493 | 0.710033  | 5.576668  | -1.329792 | 0.712432  |
| C | 4.256522  | -2.468640 | 2.258725  | 4.215097  | -2.319934 | 2.424013  | 4.194116  | -2.368199 | 2.396983  |
| H | 2.147637  | -2.071267 | 2.168195  | 2.113559  | -1.887335 | 2.310554  | 2.094163  | -1.929797 | 2.269949  |
| C | 5.506600  | -2.198937 | 1.702620  | 5.469357  | -2.096072 | 1.854899  | 5.454061  | -2.139172 | 1.842711  |
| H | 6.583735  | -1.125533 | 0.200695  | 6.565531  | -1.126919 | 0.297005  | 6.567003  | -1.148069 | 0.310767  |
| H | 4.166168  | -3.110147 | 3.131401  | 4.117227  | -2.903241 | 3.335740  | 4.086316  | -2.967054 | 3.297416  |
| H | 6.405306  | -2.640634 | 2.124695  | 6.362377  | -2.519272 | 2.307037  | 6.341620  | -2.573525 | 2.294991  |
| C | 4.503179  | 0.183610  | -1.175557 | 4.505286  | 0.115258  | -1.171798 | 4.524022  | 0.127244  | -1.153469 |
| C | 5.911486  | 0.738956  | -1.439694 | 5.921064  | 0.641311  | -1.457543 | 5.943088  | 0.656381  | -1.416226 |
| H | 5.911495  | 1.392710  | -2.315827 | 5.931263  | 1.237856  | -2.373249 | 5.963544  | 1.268037  | -2.321732 |
| H | 6.298578  | 1.304508  | -0.586312 | 6.303639  | 1.259362  | -0.639401 | 6.317985  | 1.260017  | -0.583879 |
| H | 6.610309  | -0.072074 | -1.661393 | 6.616944  | -0.186436 | -1.620205 | 6.639608  | -0.169373 | -1.585719 |

|                  |           |                      |           |           |                      |           |           |                      |           |
|------------------|-----------|----------------------|-----------|-----------|----------------------|-----------|-----------|----------------------|-----------|
| C                | 4.052994  | -0.590940            | -2.448019 | 4.067154  | -0.745357            | -2.392453 | 4.096534  | -0.712184            | -2.392593 |
| H                | 4.039169  | 0.081338             | -3.312569 | 4.064584  | -0.132639            | -3.300127 | 4.104556  | -0.084885            | -3.290214 |
| H                | 4.751434  | -1.408759            | -2.656411 | 4.762676  | -1.579406            | -2.539211 | 4.792153  | -1.544969            | -2.545404 |
| H                | 3.053880  | -1.017908            | -2.335558 | 3.063633  | -1.157119            | -2.262113 | 3.091066  | -1.124174            | -2.279237 |
| S                | -3.380218 | -2.887470            | 0.481444  | -3.287216 | -2.964790            | 0.129144  | -3.292561 | -2.958974            | 0.150737  |
| H                | -4.767569 | 1.391077             | 1.426526  | -4.619129 | 1.194437             | 1.697840  | -4.638133 | 1.218174             | 1.657006  |
| H                | -4.318262 | 1.586951             | -1.277268 | -4.530211 | 1.666666             | -0.981981 | -4.521852 | 1.660768             | -1.017275 |
| <b>TMCzPTZBN</b> |           | <b>S<sub>0</sub></b> |           |           | <b>S<sub>1</sub></b> |           |           | <b>T<sub>1</sub></b> |           |
| C                | -1.804739 | -2.247901            | 0.373949  | -1.766643 | -2.276937            | 0.271749  | -1.770211 | -2.270820            | 0.254474  |
| C                | -0.701453 | -3.088138            | 0.233937  | -0.640312 | -3.122862            | 0.239587  | -0.646881 | -3.121845            | 0.207614  |
| C                | 0.590114  | -2.580676            | 0.117811  | 0.626263  | -2.584602            | 0.170867  | 0.621593  | -2.578673            | 0.128378  |
| C                | 0.798550  | -1.195953            | 0.159841  | 0.809406  | -1.176501            | 0.177866  | 0.810155  | -1.177808            | 0.150037  |
| C                | -0.315451 | -0.306129            | 0.223204  | -0.308299 | -0.300181            | 0.184814  | -0.305273 | -0.289438            | 0.163902  |
| C                | -1.616252 | -0.856829            | 0.312912  | -1.594061 | -0.876330            | 0.235575  | -1.596918 | -0.871207            | 0.217729  |
| H                | -0.851029 | -4.163990            | 0.223832  | -0.776013 | -4.199135            | 0.208641  | -0.784239 | -4.197051            | 0.170670  |
| H                | 1.402290  | -3.272477            | -0.044966 | 1.463294  | -3.253279            | 0.041937  | 1.457194  | -3.248211            | -0.009414 |
| B                | -0.157258 | 1.218724             | 0.187637  | -0.156092 | 1.241316             | 0.095424  | -0.151409 | 1.235823             | 0.087359  |
| N                | 2.075461  | -0.622223            | 0.090738  | 2.074709  | -0.611356            | 0.099729  | 2.081691  | -0.612430            | 0.085905  |
| N                | -2.746862 | -0.018634            | 0.319086  | -2.719584 | -0.023205            | 0.225642  | -2.721988 | -0.018817            | 0.215960  |
| C                | 2.248454  | 0.729890             | -0.200274 | 2.255185  | 0.745371             | -0.249918 | 2.267097  | 0.744259             | -0.247559 |
| C                | 3.613446  | 0.999970             | -0.437251 | 3.612912  | 0.994857             | -0.487799 | 3.627913  | 0.995027             | -0.474456 |
| C                | 1.246204  | 1.712263             | -0.223897 | 1.238533  | 1.721311             | -0.297690 | 1.253807  | 1.723062             | -0.293174 |
| C                | 3.992185  | 2.293383             | -0.786225 | 4.016232  | 2.289855             | -0.862178 | 4.032312  | 2.291727             | -0.836843 |
| C                | 1.685129  | 3.002269             | -0.596043 | 1.700797  | 3.009807             | -0.689216 | 1.715606  | 3.008625             | -0.674223 |
| C                | 3.021922  | 3.307886             | -0.887210 | 3.045135  | 3.296567             | -0.975989 | 3.064398  | 3.298557             | -0.951828 |
| H                | 5.036282  | 2.524285             | -0.986300 | 5.062281  | 2.510950             | -1.056561 | 5.079740  | 2.514327             | -1.022378 |
| H                | 0.951035  | 3.799286             | -0.674456 | 0.975650  | 3.813457             | -0.785451 | 0.992180  | 3.814089             | -0.769015 |
| C                | 3.357812  | -1.217671            | 0.139785  | 3.355603  | -1.205797            | 0.178836  | 3.359127  | -1.208673            | 0.170117  |
| C                | 3.775878  | -2.490492            | 0.541501  | 3.777495  | -2.452255            | 0.652410  | 3.773982  | -2.462422            | 0.633676  |
| C                | 4.324031  | -0.241818            | -0.216230 | 4.317926  | -0.236863            | -0.216346 | 4.328605  | -0.240137            | -0.209145 |
| C                | 5.138885  | -2.783125            | 0.512616  | 5.141041  | -2.746773            | 0.640855  | 5.135604  | -2.760392            | 0.629166  |
| H                | 3.089289  | -3.237429            | 0.915621  | 3.094954  | -3.177934            | 1.074754  | 3.085030  | -3.189810            | 1.042370  |
| C                | 5.683671  | -0.564432            | -0.240683 | 5.678496  | -0.561627            | -0.220957 | 5.688086  | -0.569601            | -0.207961 |
| C                | 6.110303  | -1.847958            | 0.107957  | 6.107424  | -1.826758            | 0.189321  | 6.109372  | -1.839614            | 0.192971  |
| H                | 5.458135  | -3.773444            | 0.829179  | 5.462979  | -3.717038            | 1.011558  | 5.452082  | -3.734985            | 0.993324  |
| H                | 6.412825  | 0.192987             | -0.518020 | 6.408158  | 0.183186             | -0.529294 | 6.422410  | 0.175270             | -0.504980 |
| C                | -2.641979 | 1.329959             | 0.727643  | -2.608225 | 1.308336             | 0.767342  | -2.609926 | 1.312566             | 0.743465  |
| C                | -3.781888 | 1.971623             | 1.250129  | -3.692947 | 1.835783             | 1.472206  | -3.700983 | 1.852145             | 1.434961  |
| C                | -1.398653 | 2.011032             | 0.659100  | -1.393240 | 2.022457             | 0.599575  | -1.387676 | 2.019970             | 0.583544  |
| C                | -3.702055 | 3.283751             | 1.694287  | -3.639942 | 3.147292             | 1.954704  | -3.644021 | 3.161075             | 1.914945  |
| C                | -1.362304 | 3.340445             | 1.138534  | -1.386386 | 3.346035             | 1.099880  | -1.380983 | 3.346551             | 1.078657  |
| C                | -2.486725 | 3.979911             | 1.640626  | -2.485306 | 3.906766             | 1.747842  | -2.480832 | 3.913372             | 1.715551  |
| H                | -4.587067 | 3.758658             | 2.110651  | -4.490893 | 3.560113             | 2.489364  | -4.494922 | 3.579814             | 2.444799  |
| H                | -0.412975 | 3.866714             | 1.138599  | -0.477776 | 3.932132             | 1.005418  | -0.468940 | 3.928168             | 0.991532  |
| H                | -2.423519 | 5.001367             | 2.006311  | -2.434100 | 4.929410             | 2.114859  | -2.426302 | 4.935808             | 2.082785  |
| C                | -3.903913 | -0.457372            | -0.397019 | -3.906787 | -0.418716            | -0.394841 | -3.920673 | -0.421058            | -0.387496 |

|                 |           |                      |           |           |                      |           |           |                      |           |
|-----------------|-----------|----------------------|-----------|-----------|----------------------|-----------|-----------|----------------------|-----------|
| C               | -4.586121 | 0.404597             | -1.269596 | -4.738709 | 0.518477             | -1.049825 | -4.746935 | 0.511146             | -1.054235 |
| C               | -4.336613 | -1.790384            | -0.297162 | -4.314113 | -1.778380            | -0.414435 | -4.331614 | -1.776410            | -0.379438 |
| C               | -5.721205 | -0.027689            | -1.952061 | -5.927948 | 0.127383             | -1.640877 | -5.946289 | 0.120060             | -1.625338 |
| C               | -5.461231 | -2.227378            | -1.004430 | -5.528650 | -2.160717            | -1.006589 | -5.556456 | -2.159120            | -0.949711 |
| C               | -6.171999 | -1.341492            | -1.811597 | -6.342071 | -1.214281            | -1.609505 | -6.369712 | -1.216613            | -1.559527 |
| H               | -6.242634 | 0.664389             | -2.607610 | -6.535844 | 0.871901             | -2.147004 | -6.552599 | 0.858675             | -2.141640 |
| H               | -5.771515 | -3.264728            | -0.917929 | -5.813244 | -3.208961            | -1.000841 | -5.848624 | -3.204901            | -0.924039 |
| H               | -7.055459 | -1.682564            | -2.343956 | -7.276652 | -1.515360            | -2.072623 | -7.312061 | -1.519707            | -2.005538 |
| H               | -4.718578 | 1.430616             | 1.329947  | -4.582213 | 1.235716             | 1.637907  | -4.593196 | 1.256097             | 1.598244  |
| H               | -4.232102 | 1.420781             | -1.401546 | -4.427053 | 1.554427             | -1.093671 | -4.423920 | 1.542307             | -1.123575 |
| S               | -3.413516 | -2.908464            | 0.722291  | -3.337988 | -3.023009            | 0.331459  | -3.340282 | -3.017411            | 0.354774  |
| C               | 3.429014  | 4.703007             | -1.299443 | 3.444764  | 4.682520             | -1.427704 | 3.462140  | 4.689984             | -1.386787 |
| H               | 3.799593  | 4.722680             | -2.332096 | 3.401122  | 4.772766             | -2.521613 | 3.244188  | 4.851281             | -2.451109 |
| H               | 2.588619  | 5.400355             | -1.237311 | 2.780268  | 5.448131             | -1.013958 | 2.915075  | 5.457743             | -0.828536 |
| H               | 4.233309  | 5.091366             | -0.663280 | 4.468866  | 4.925241             | -1.124760 | 4.532653  | 4.867184             | -1.242799 |
| C               | 7.569946  | -2.229080            | 0.062890  | 7.568565  | -2.202957            | 0.165833  | 7.569153  | -2.221570            | 0.178087  |
| H               | 7.784494  | -2.883474            | -0.792009 | 7.785761  | -2.906302            | -0.648894 | 7.785626  | -2.937604            | -0.625568 |
| H               | 8.211954  | -1.348057            | -0.029386 | 8.206806  | -1.326248            | 0.021169  | 8.210894  | -1.349327            | 0.022528  |
| H               | 7.871637  | -2.772333            | 0.965526  | 7.873221  | -2.691354            | 1.098647  | 7.869955  | -2.697332            | 1.118762  |
| <b>PXZDPABN</b> |           | <b>S<sub>0</sub></b> |           |           | <b>S<sub>1</sub></b> |           |           | <b>T<sub>1</sub></b> |           |
| C               | 1.506847  | 2.299829             | -0.479467 | -1.475762 | -2.256891            | -0.633519 | -1.469960 | -2.249305            | -0.624731 |
| C               | 0.336746  | 3.025486             | -0.677501 | -0.314236 | -2.975100            | -0.891950 | -0.303875 | -2.970332            | -0.895148 |
| C               | -0.926064 | 2.447864             | -0.572349 | 0.942968  | -2.381385            | -0.734502 | 0.947086  | -2.376558            | -0.735725 |
| C               | -1.020528 | 1.082551             | -0.271410 | 1.003179  | -1.049963            | -0.301536 | 1.007567  | -1.045547            | -0.295880 |
| C               | 0.150904  | 0.291160             | -0.112336 | -0.148008 | -0.258484            | -0.123719 | -0.144785 | -0.248237            | -0.114794 |
| C               | 1.422763  | 0.925113             | -0.188353 | -1.404449 | -0.892611            | -0.247360 | -1.402655 | -0.892037            | -0.237162 |
| H               | 0.411861  | 4.080900             | -0.928368 | -0.384047 | -4.009505            | -1.215384 | -0.375920 | -4.000507            | -1.230226 |
| H               | -1.811613 | 3.044314             | -0.754057 | 1.842664  | -2.941115            | -0.962483 | 1.848009  | -2.932127            | -0.969850 |
| B               | 0.055799  | -1.215132            | 0.063078  | -0.053848 | 1.261525             | 0.077637  | -0.055203 | 1.264009             | 0.069329  |
| N               | -2.270565 | 0.453746             | -0.153957 | 2.270345  | -0.422853            | -0.099467 | 2.275582  | -0.418195            | -0.097926 |
| N               | 2.582886  | 0.167731             | 0.013469  | -2.567242 | -0.160379            | -0.001458 | -2.569945 | -0.160283            | 0.001944  |
| C               | -2.412030 | -0.926974            | -0.386863 | 2.437360  | 0.958756             | -0.380707 | 2.437968  | 0.961169             | -0.368657 |
| C               | -3.687677 | -1.388244            | -0.764218 | 3.720488  | 1.400892             | -0.716115 | 3.725384  | 1.409489             | -0.694061 |
| C               | -1.325366 | -1.827803            | -0.295906 | 1.338302  | 1.857240             | -0.301559 | 1.328224  | 1.859069             | -0.295630 |
| C               | -3.904658 | -2.721152            | -1.072503 | 3.974843  | 2.733099             | -1.059301 | 3.979073  | 2.742406             | -1.031885 |
| C               | -1.572037 | -3.174885            | -0.650677 | 1.624903  | 3.187534             | -0.662988 | 1.622238  | 3.194481             | -0.648261 |
| C               | -2.830485 | -3.618973            | -1.030778 | 2.905095  | 3.619302             | -1.040236 | 2.902596  | 3.624678             | -1.013638 |
| H               | -4.899945 | -3.033243            | -1.374049 | 4.986320  | 3.037081             | -1.306254 | 4.990332  | 3.051036             | -1.272046 |
| H               | -0.744213 | -3.875367            | -0.659174 | 0.819343  | 3.913540             | -0.660039 | 0.816867  | 3.920493             | -0.654866 |
| H               | -2.989439 | -4.658183            | -1.305597 | 3.067481  | 4.661314             | -1.303243 | 3.064808  | 4.667846             | -1.273648 |
| C               | -3.440601 | 1.128492             | 0.287015  | 3.387645  | -1.119368            | 0.339462  | 3.395566  | -1.121307            | 0.332806  |
| C               | -3.433420 | 2.219416             | 1.165829  | 3.332166  | -2.294540            | 1.121219  | 3.336957  | -2.299996            | 1.107569  |
| C               | -4.682975 | 0.615335             | -0.118089 | 4.670050  | -0.610002            | 0.000850  | 4.674450  | -0.610086            | -0.002269 |
| C               | -4.628192 | 2.832138             | 1.546416  | 4.497651  | -2.955505            | 1.480783  | 4.501117  | -2.964525            | 1.462746  |
| H               | -2.490024 | 2.596607             | 1.542389  | 2.368854  | -2.665324            | 1.448992  | 2.373045  | -2.669063            | 1.435133  |
| C               | -5.877944 | 1.216892             | 0.264291  | 5.836296  | -1.285899            | 0.353404  | 5.840771  | -1.290981            | 0.341759  |

|                 |           |                      |           |           |                      |           |           |                      |           |
|-----------------|-----------|----------------------|-----------|-----------|----------------------|-----------|-----------|----------------------|-----------|
| C               | -5.851252 | 2.345174             | 1.084457  | 5.752128  | -2.466561            | 1.085135  | 5.755330  | -2.475641            | 1.065565  |
| H               | -4.595200 | 3.689247             | 2.213081  | 4.431750  | -3.854040            | 2.087225  | 4.434979  | -3.864965            | 2.066097  |
| H               | -6.811242 | 0.785812             | -0.084650 | 6.790112  | -0.863527            | 0.054365  | 6.794929  | -0.867604            | 0.045411  |
| H               | -6.782095 | 2.824093             | 1.374365  | 6.659377  | -2.992238            | 1.366915  | 6.662234  | -3.004713            | 1.341973  |
| C               | 2.576691  | -1.176035            | 0.420815  | -2.577008 | 1.195396             | 0.428846  | -2.584885 | 1.197677             | 0.414605  |
| C               | 3.797070  | -1.802941            | 0.764803  | -3.797343 | 1.783792             | 0.792996  | -3.809343 | 1.787761             | 0.772276  |
| C               | 1.359697  | -1.915285            | 0.492254  | -1.356216 | 1.952067             | 0.468877  | -1.369925 | 1.957630             | 0.452756  |
| C               | 3.812787  | -3.112669            | 1.219859  | -3.855456 | 3.120105             | 1.210206  | -3.868902 | 3.121700             | 1.182156  |
| C               | 1.429611  | -3.236950            | 0.989661  | -1.471582 | 3.296424             | 0.923102  | -1.485963 | 3.298106             | 0.901752  |
| C               | 2.623193  | -3.839748            | 1.355459  | -2.683346 | 3.875457             | 1.281535  | -2.698375 | 3.879571             | 1.255930  |
| H               | 4.764760  | -3.565559            | 1.487015  | -4.814671 | 3.551324             | 1.484496  | -4.829455 | 3.553399             | 1.451587  |
| H               | 0.504533  | -3.791550            | 1.109557  | -0.565153 | 3.885575             | 1.021063  | -0.580278 | 3.888596             | 0.998047  |
| H               | 2.637449  | -4.856264            | 1.739383  | -2.715254 | 4.908330             | 1.622266  | -2.732103 | 4.913170             | 1.593412  |
| C               | 3.853797  | 0.823454             | -0.164930 | -3.830540 | -0.833760            | -0.142921 | -3.830192 | -0.840569            | -0.137246 |
| C               | 4.481382  | 0.786857             | -1.413553 | -4.525080 | -0.759813            | -1.354752 | -4.520863 | -0.781680            | -1.351996 |
| C               | 4.454835  | 1.495660             | 0.904252  | -4.363628 | -1.563474            | 0.925282  | -4.363279 | -1.561812            | 0.936451  |
| C               | 5.711482  | 1.422479             | -1.590778 | -5.747508 | -1.418299            | -1.497466 | -5.741501 | -1.444360            | -1.490955 |
| C               | 5.684787  | 2.129884             | 0.721491  | -5.585987 | -2.221379            | 0.777339  | -5.583755 | -2.223815            | 0.792283  |
| C               | 6.314407  | 2.094241             | -0.524925 | -6.279508 | -2.149968            | -0.432952 | -6.274488 | -2.166180            | -0.420424 |
| H               | 6.197326  | 1.392287             | -2.562443 | -6.282929 | -1.359877            | -2.441555 | -6.274822 | -1.396532            | -2.436807 |
| H               | 6.150090  | 2.651148             | 1.553904  | -5.996188 | -2.787991            | 1.609298  | -5.994772 | -2.782758            | 1.628974  |
| H               | 7.272130  | 2.588511             | -0.665011 | -7.231391 | -2.662285            | -0.546097 | -7.225068 | -2.681529            | -0.530582 |
| H               | 4.732051  | -1.262351            | 0.693201  | -4.716171 | 1.212467             | 0.754034  | -4.726995 | 1.214354             | 0.735264  |
| H               | 4.003507  | 0.262245             | -2.235693 | -4.102974 | -0.187320            | -2.175459 | -4.098001 | -0.216788            | -2.177556 |
| H               | 2.462196  | 2.801117             | -0.557116 | -2.433740 | -2.747582            | -0.749313 | -2.427203 | -2.740695            | -0.744153 |
| H               | 3.957186  | 1.516983             | 1.869315  | -3.818437 | -1.609579            | 1.863489  | -3.819977 | -1.597634            | 1.876188  |
| O               | -4.747147 | -0.513452            | -0.899979 | 4.799757  | 0.545425             | -0.704840 | 4.803306  | 0.556339             | -0.689784 |
| <b>PTZDPABN</b> |           | <b>S<sub>0</sub></b> |           |           | <b>S<sub>1</sub></b> |           |           | <b>T<sub>1</sub></b> |           |
| C               | -1.648223 | -2.268243            | -0.591227 | -1.620233 | -2.199518            | -0.789347 | -1.607252 | -2.199769            | -0.757094 |
| C               | -0.478309 | -2.991078            | -0.803014 | -0.457155 | -2.906166            | -1.084277 | -0.437001 | -2.911516            | -1.043183 |
| C               | 0.785080  | -2.416452            | -0.677926 | 0.801033  | -2.326763            | -0.888923 | 0.811483  | -2.326594            | -0.845336 |
| C               | 0.876744  | -1.060515            | -0.344351 | 0.858492  | -1.021055            | -0.387036 | 0.867776  | -1.008829            | -0.359158 |
| C               | -0.290848 | -0.278414            | -0.150610 | -0.288510 | -0.243276            | -0.158148 | -0.284943 | -0.226842            | -0.144464 |
| C               | -1.563439 | -0.904936            | -0.249483 | -1.547841 | -0.864062            | -0.321158 | -1.541857 | -0.862251            | -0.304575 |
| H               | -0.554499 | -4.039345            | -1.081742 | -0.530056 | -3.921275            | -1.463631 | -0.507064 | -3.927546            | -1.419315 |
| H               | 1.675918  | -3.006834            | -0.858693 | 1.704860  | -2.877153            | -1.126893 | 1.718869  | -2.873457            | -1.077950 |
| B               | -0.181339 | 1.211921             | 0.117524  | -0.174505 | 1.254209             | 0.140051  | -0.182561 | 1.265439             | 0.136734  |
| N               | 2.140656  | -0.448450            | -0.215141 | 2.134967  | -0.413600            | -0.144022 | 2.138225  | -0.400681            | -0.131805 |
| N               | -2.718706 | -0.151536            | -0.010963 | -2.704763 | -0.138638            | -0.025710 | -2.706117 | -0.141220            | -0.027314 |
| C               | 2.288849  | 0.941278             | -0.417436 | 2.314676  | 0.971512             | -0.424320 | 2.311546  | 0.984416             | -0.391983 |
| C               | 3.542330  | 1.422952             | -0.849809 | 3.570291  | 1.441144             | -0.830933 | 3.573187  | 1.458329             | -0.791618 |
| C               | 1.201581  | 1.833232             | -0.228782 | 1.207656  | 1.859610             | -0.246866 | 1.195835  | 1.871949             | -0.223107 |
| C               | 3.736087  | 2.785462             | -1.066975 | 3.779774  | 2.805697             | -1.115032 | 3.780757  | 2.822979             | -1.060367 |
| C               | 1.427524  | 3.196816             | -0.517202 | 1.462378  | 3.211222             | -0.550355 | 1.455727  | 3.229509             | -0.515259 |
| C               | 2.669217  | 3.675348             | -0.914535 | 2.711238  | 3.680026             | -0.974960 | 2.706278  | 3.696494             | -0.921392 |
| H               | 4.709770  | 3.141066             | -1.392372 | 4.764396  | 3.155402             | -1.408468 | 4.765073  | 3.177405             | -1.348208 |

|               |           |                      |           |                      |           |           |                      |           |           |
|---------------|-----------|----------------------|-----------|----------------------|-----------|-----------|----------------------|-----------|-----------|
| H             | 0.596295  | 3.890597             | -0.452407 | 0.650222             | 3.924342  | -0.459613 | 0.640764             | 3.940880  | -0.439483 |
| H             | 2.813567  | 4.732153             | -1.122583 | 2.850667             | 4.737792  | -1.183576 | 2.848357             | 4.755363  | -1.124292 |
| C             | 3.213206  | -1.153147            | 0.407974  | 3.150937             | -1.157702 | 0.440813  | 3.167793             | -1.155767 | 0.435444  |
| C             | 2.983479  | -2.043999            | 1.468020  | 2.863212             | -2.208633 | 1.346546  | 2.884623             | -2.190228 | 1.357146  |
| C             | 4.538497  | -0.905638            | 0.014376  | 4.518086             | -0.878225 | 0.156227  | 4.524807             | -0.889795 | 0.119270  |
| C             | 4.041597  | -2.729571            | 2.060322  | 3.880349             | -2.961747 | 1.905370  | 3.903826             | -2.957946 | 1.895534  |
| H             | 1.969874  | -2.208905            | 1.815699  | 1.831349             | -2.398796 | 1.615095  | 1.856628             | -2.359993 | 1.653700  |
| C             | 5.600835  | -1.575849            | 0.629990  | 5.535285             | -1.655358 | 0.728653  | 5.544571             | -1.680043 | 0.667394  |
| C             | 5.353499  | -2.507559            | 1.635921  | 5.223893             | -2.698003 | 1.590763  | 5.239836             | -2.716790 | 1.540454  |
| H             | 3.837327  | -3.427586            | 2.867674  | 3.631533             | -3.750747 | 2.609248  | 3.661618             | -3.737509 | 2.611959  |
| H             | 6.617991  | -1.361225            | 0.314868  | 6.570841             | -1.426143 | 0.495173  | 6.577465             | -1.464756 | 0.409978  |
| H             | 6.180922  | -3.038291            | 2.098493  | 6.018906             | -3.289794 | 2.034329  | 6.038404             | -3.318531 | 1.964140  |
| C             | -2.701757 | 1.166700             | 0.472434  | -2.699357            | 1.184274  | 0.495069  | -2.714935            | 1.188110  | 0.470730  |
| C             | -3.919089 | 1.783874             | 0.844714  | -3.914298            | 1.758477  | 0.902026  | -3.939435            | 1.759845  | 0.858948  |
| C             | -1.478725 | 1.891257             | 0.595059  | -1.473818            | 1.927531  | 0.586685  | -1.496357            | 1.938105  | 0.566980  |
| C             | -3.926578 | 3.062758             | 1.379832  | -3.958560            | 3.059787  | 1.414790  | -3.994495            | 3.061498  | 1.360791  |
| C             | -1.540979 | 3.179640             | 1.174818  | -1.574946            | 3.233255  | 1.137924  | -1.608209            | 3.242924  | 1.108861  |
| C             | -2.731524 | 3.768759             | 1.570371  | -2.780366            | 3.797632  | 1.540829  | -2.820170            | 3.804781  | 1.496370  |
| H             | -4.876589 | 3.507270             | 1.667197  | -4.913787            | 3.478876  | 1.720489  | -4.954494            | 3.479400  | 1.652750  |
| H             | -0.611893 | 3.717363             | 1.334948  | -0.662147            | 3.804844  | 1.275432  | -0.700029            | 3.820255  | 1.251158  |
| H             | -2.739944 | 4.758968             | 2.017848  | -2.802106            | 4.802728  | 1.956646  | -2.850507            | 4.811883  | 1.906309  |
| C             | -3.993570 | -0.788144            | -0.227428 | -3.972784            | -0.792673 | -0.207165 | -3.968824            | -0.808491 | -0.207756 |
| C             | -4.611318 | -0.689480            | -1.477480 | -4.666846            | -0.640083 | -1.411939 | -4.652699            | -0.682057 | -1.420984 |
| C             | -4.606927 | -1.504786            | 0.805303  | -4.510517            | -1.584149 | 0.813756  | -4.508372            | -1.584529 | 0.823515  |
| C             | -5.844450 | -1.307357            | -1.692631 | -5.893916            | -1.279971 | -1.594280 | -5.874450            | -1.332783 | -1.600827 |
| C             | -5.839887 | -2.120798            | 0.584687  | -5.737381            | -2.223145 | 0.626376  | -5.729959            | -2.233963 | 0.638177  |
| C             | -6.459951 | -2.023051            | -0.663238 | -6.430767            | -2.072281 | -0.576762 | -6.414519            | -2.109279 | -0.573021 |
| H             | -6.322708 | -1.228861            | -2.665336 | -6.429178            | -1.159533 | -2.532572 | -6.402930            | -1.232788 | -2.545265 |
| H             | -6.314913 | -2.676665            | 1.388730  | -6.151307            | -2.837317 | 1.421958  | -6.146470            | -2.835893 | 1.441618  |
| H             | -7.420009 | -2.503340            | -0.832754 | -7.386232            | -2.569991 | -0.720705 | -7.365871            | -2.615204 | -0.715184 |
| S             | 4.834843  | 0.278856             | -1.267408 | 4.952303             | 0.363213  | -0.995533 | 4.942384             | 0.374623  | -1.017887 |
| H             | -4.858390 | 1.257865             | 0.732687  | -4.838914            | 1.200678  | 0.823086  | -4.859877            | 1.195969  | 0.775448  |
| H             | -4.123727 | -0.131070            | -2.271166 | -4.240881            | -0.021096 | -2.196100 | -4.224140            | -0.075131 | -2.213065 |
| H             | -2.604377 | -2.764720            | -0.689539 | -2.578588            | -2.681503 | -0.936349 | -2.563589            | -2.684520 | -0.907323 |
| H             | -4.116758 | -1.574181            | 1.771908  | -3.965357            | -1.692249 | 1.746885  | -3.969701            | -1.672478 | 1.762455  |
| <b>2DPABN</b> |           | <b>S<sub>0</sub></b> |           | <b>S<sub>1</sub></b> |           |           | <b>T<sub>1</sub></b> |           |           |
| C             | 1.219238  | -2.334665            | 0.017327  | -1.206083            | 2.332529  | 0.024915  | -1.206217            | 2.324817  | 0.012945  |
| C             | -0.000032 | -3.003315            | 0.000003  | -0.000004            | 3.021409  | 0.000003  | -0.000001            | 3.021946  | 0.000000  |
| C             | -1.219311 | -2.334647            | -0.017297 | 1.206076             | 2.332531  | -0.024911 | 1.206215             | 2.324817  | -0.012945 |
| C             | -1.226109 | -0.928716            | 0.000675  | 1.207014             | 0.901654  | -0.010251 | 1.208431             | 0.906366  | -0.003159 |
| C             | -0.000021 | -0.204028            | -0.000009 | -0.000001            | 0.177222  | 0.000000  | 0.000000             | 0.168234  | -0.000002 |
| C             | 1.226040  | -0.928713            | -0.000660 | -1.207017            | 0.901652  | 0.010253  | -1.208431            | 0.906365  | 0.003156  |
| H             | 2.138859  | -2.903811            | 0.027463  | -2.134283            | 2.886860  | 0.047729  | -2.135497            | 2.878861  | 0.026650  |
| H             | -0.000050 | -4.090946            | 0.000027  | -0.000005            | 4.107015  | 0.000004  | -0.000001            | 4.106952  | 0.000001  |
| H             | -2.138896 | -2.903842            | -0.027518 | 2.134275             | 2.886865  | -0.047724 | 2.135495             | 2.878862  | -0.026649 |
| B             | -0.000004 | 1.312943             | 0.000011  | 0.000000             | -1.366010 | 0.000001  | 0.000000             | -1.354943 | -0.000003 |

|                |           |                      |           |                      |           |           |                      |           |           |
|----------------|-----------|----------------------|-----------|----------------------|-----------|-----------|----------------------|-----------|-----------|
| N              | -2.439602 | -0.228874            | 0.009178  | 2.419954             | 0.228283  | -0.002077 | 2.429035             | 0.223569  | 0.002154  |
| N              | 2.439564  | -0.228940            | -0.009205 | -2.419956            | 0.228280  | 0.002077  | -2.429035            | 0.223569  | -0.002156 |
| C              | -2.539864 | 1.156382             | 0.211526  | 2.551756             | -1.182304 | 0.158062  | 2.555865             | -1.178421 | 0.161324  |
| C              | -3.818647 | 1.740872             | 0.369176  | 3.840306             | -1.725631 | 0.268794  | 3.845296             | -1.728652 | 0.276804  |
| C              | -1.373673 | 1.974208             | 0.273063  | 1.380473             | -2.010982 | 0.211091  | 1.382359             | -2.007075 | 0.211298  |
| C              | -3.947288 | 3.090748             | 0.657823  | 4.021111             | -3.099342 | 0.485777  | 4.021064             | -3.098313 | 0.497293  |
| C              | -1.562480 | 3.333269             | 0.615182  | 1.624319             | -3.384584 | 0.486234  | 1.622450             | -3.377101 | 0.489632  |
| C              | -2.813897 | 3.897870             | 0.811730  | 2.903347             | -3.922282 | 0.616322  | 2.899730             | -3.917838 | 0.626682  |
| H              | -4.942467 | 3.510701             | 0.784808  | 5.027244             | -3.501512 | 0.565182  | 5.025344             | -3.503977 | 0.581712  |
| H              | -0.686925 | 3.957441             | 0.754556  | 0.775144             | -4.042644 | 0.626051  | 0.772512             | -4.034935 | 0.625020  |
| H              | -2.913181 | 4.946813             | 1.078178  | 3.025160             | -4.984681 | 0.817692  | 3.018003             | -4.979905 | 0.831360  |
| C              | -3.654248 | -0.990704            | -0.130933 | 3.631497             | 1.004664  | -0.104061 | 3.638537             | 1.002586  | -0.104583 |
| C              | -4.301802 | -1.501038            | 0.999158  | 4.259386             | 1.481488  | 1.050986  | 4.269043             | 1.483037  | 1.047456  |
| C              | -4.181839 | -1.220762            | -1.404868 | 4.171685             | 1.274630  | -1.364587 | 4.172957             | 1.273384  | -1.367258 |
| C              | -5.477126 | -2.239361            | 0.851738  | 5.425386             | 2.240846  | 0.939995  | 5.435479             | 2.240517  | 0.931619  |
| H              | -3.882056 | -1.316495            | 1.983628  | 3.831730             | 1.257574  | 2.023685  | 3.844270             | 1.261219  | 2.021884  |
| C              | -5.357656 | -1.959728            | -1.547062 | 5.338585             | 2.034456  | -1.468152 | 5.340223             | 2.031301  | -1.475659 |
| C              | -6.006544 | -2.469667            | -0.420319 | 5.965865             | 2.518255  | -0.318050 | 5.972355             | 2.515574  | -0.328367 |
| H              | -5.978304 | -2.634143            | 1.731652  | 5.909795             | 2.615534  | 1.837750  | 5.923637             | 2.615090  | 1.827382  |
| H              | -5.765493 | -2.136089            | -2.538919 | 5.755210             | 2.247648  | -2.448934 | 5.753983             | 2.242329  | -2.458109 |
| H              | -6.921931 | -3.044705            | -0.532857 | 6.873648             | 3.109878  | -0.401458 | 6.880938             | 3.105378  | -0.415542 |
| C              | 2.539859  | 1.156318             | -0.211608 | -2.551757            | -1.182308 | -0.158065 | -2.555866            | -1.178422 | -0.161325 |
| C              | 3.818639  | 1.740750             | -0.369424 | -3.840306            | -1.725637 | -0.268802 | -3.845297            | -1.728653 | -0.276801 |
| C              | 1.373700  | 1.974175             | -0.273076 | -1.380472            | -2.010984 | -0.211089 | -1.382360            | -2.007075 | -0.211302 |
| C              | 3.947312  | 3.090628             | -0.658044 | -4.021107            | -3.099349 | -0.485784 | -4.021065            | -3.098315 | -0.497289 |
| C              | 1.562513  | 3.333240             | -0.615197 | -1.624315            | -3.384588 | -0.486230 | -1.622451            | -3.377102 | -0.489634 |
| C              | 2.813932  | 3.897802             | -0.811833 | -2.903342            | -3.922288 | -0.616322 | -2.899730            | -3.917839 | -0.626681 |
| H              | 4.942490  | 3.510536             | -0.785171 | -5.027239            | -3.501520 | -0.565193 | -5.025344            | -3.503979 | -0.581704 |
| H              | 0.686940  | 3.957394             | -0.754514 | -0.775139            | -4.042647 | -0.626042 | -0.772513            | -4.034936 | -0.625024 |
| H              | 2.913259  | 4.946747             | -1.078255 | -3.025152            | -4.984687 | -0.817691 | -3.018004            | -4.979906 | -0.831357 |
| C              | 3.654212  | -0.990760            | 0.131079  | -3.631499            | 1.004662  | 0.104061  | -3.638537            | 1.002586  | 0.104582  |
| C              | 4.182065  | -1.220410            | 1.404984  | -4.171691            | 1.274619  | 1.364587  | -4.172956            | 1.273383  | 1.367258  |
| C              | 4.301509  | -1.501495            | -0.998980 | -4.259380            | 1.481498  | -1.050985 | -4.269043            | 1.483039  | -1.047456 |
| C              | 5.357966  | -1.959235            | 1.547116  | -5.338590            | 2.034447  | 1.468152  | -5.340221            | 2.031301  | 1.475660  |
| C              | 5.476916  | -2.239711            | -0.851608 | -5.425379            | 2.240858  | -0.939993 | -5.435478            | 2.240520  | -0.931618 |
| H              | 3.881375  | -1.317458            | -1.983381 | -3.831719            | 1.257592  | -2.023683 | -3.844270            | 1.261222  | -2.021884 |
| C              | 6.006664  | -2.469496            | 0.420398  | -5.965864            | 2.518257  | 0.318052  | -5.972354            | 2.515576  | 0.328370  |
| H              | 5.766065  | -2.135287            | 2.538924  | -5.755219            | 2.247633  | 2.448934  | -5.753980            | 2.242328  | 2.458111  |
| H              | 5.977887  | -2.634751            | -1.731525 | -5.909783            | 2.615555  | -1.837747 | -5.923636            | 2.615095  | -1.827380 |
| H              | 6.922106  | -3.044429            | 0.532992  | -6.873646            | 3.109882  | 0.401460  | -6.880936            | 3.105381  | 0.415545  |
| H              | 4.712573  | 1.136265             | -0.286432 | -4.714862            | -1.092644 | -0.196614 | -4.720996            | -1.096993 | -0.206359 |
| H              | 3.669409  | -0.819324            | 2.274383  | -3.676268            | 0.891317  | 2.251644  | -3.673842            | 0.890205  | 2.252276  |
| H              | -4.712558 | 1.136389             | 0.286010  | 4.714861             | -1.092636 | 0.196601  | 4.720995             | -1.096990 | 0.206365  |
| H              | -3.669003 | -0.819898            | -2.274267 | 3.676257             | 0.891336  | -2.251645 | 3.673843             | 0.890207  | -2.252277 |
| <b>CzDPABN</b> |           | <b>S<sub>0</sub></b> |           | <b>S<sub>1</sub></b> |           |           | <b>T<sub>1</sub></b> |           |           |
| C              | 0.950671  | -2.579674            | 0.236436  | 0.950643             | -2.565083 | 0.323432  | 0.944080             | -2.556054 | 0.363844  |



|   |           |           |           |           |           |           |           |           |           |
|---|-----------|-----------|-----------|-----------|-----------|-----------|-----------|-----------|-----------|
| C | -0.331349 | -3.125325 | 0.296367  | -0.312813 | -3.126897 | 0.392827  | -0.319512 | -3.122102 | 0.438333  |
| C | -1.472282 | -2.345719 | 0.184792  | -1.449948 | -2.330100 | 0.256685  | -1.456132 | -2.322602 | 0.284425  |
| C | -1.344611 | -0.948063 | 0.046209  | -1.320537 | -0.923821 | 0.092870  | -1.322699 | -0.924168 | 0.105617  |
| C | -0.054279 | -0.346588 | 0.008762  | -0.045079 | -0.313215 | 0.040597  | -0.044646 | -0.306534 | 0.054530  |
| C | 1.090773  | -1.200895 | 0.056980  | 1.084130  | -1.164433 | 0.089725  | 1.083470  | -1.168440 | 0.109522  |
| H | 1.805073  | -3.222156 | 0.386732  | 1.819652  | -3.177302 | 0.514825  | 1.812734  | -3.169957 | 0.556107  |
| H | -0.439128 | -4.197604 | 0.440347  | -0.423335 | -4.190874 | 0.577543  | -0.430292 | -4.183231 | 0.636476  |
| H | -2.443955 | -2.818800 | 0.223119  | -2.425592 | -2.792987 | 0.314627  | -2.433198 | -2.782785 | 0.341757  |
| B | 0.067980  | 1.178385  | 0.019477  | 0.085525  | 1.226075  | 0.023578  | 0.082074  | 1.219064  | 0.032561  |
| N | -2.491827 | -0.149947 | -0.030203 | -2.472976 | -0.144634 | 0.000854  | -2.475964 | -0.140998 | -0.000190 |
| N | 2.354470  | -0.592470 | -0.029881 | 2.339961  | -0.584863 | -0.007460 | 2.347164  | -0.586228 | -0.001096 |
| C | -2.468875 | 1.236679  | -0.240426 | -2.475954 | 1.257536  | -0.199357 | -2.477105 | 1.256796  | -0.195970 |
| C | -3.685578 | 1.928370  | -0.447553 | -3.706787 | 1.913677  | -0.394396 | -3.708865 | 1.913772  | -0.396217 |
| C | -1.237550 | 1.952832  | -0.247069 | -1.245445 | 1.985835  | -0.206066 | -1.241799 | 1.984311  | -0.191550 |
| C | -3.686289 | 3.291240  | -0.699895 | -3.747664 | 3.290080  | -0.621860 | -3.750473 | 3.289001  | -0.613949 |
| C | -1.294554 | 3.335775  | -0.538636 | -1.343002 | 3.368225  | -0.468501 | -1.343128 | 3.370504  | -0.443561 |
| C | -2.484678 | 4.008594  | -0.765068 | -2.560590 | 4.020319  | -0.670434 | -2.559469 | 4.018919  | -0.647906 |
| H | -4.635419 | 3.796177  | -0.863779 | -4.707725 | 3.777552  | -0.768115 | -4.708504 | 3.778479  | -0.764591 |
| H | -0.363143 | 3.885982  | -0.612721 | -0.428712 | 3.946161  | -0.536470 | -0.431384 | 3.952743  | -0.503801 |
| H | -2.487233 | 5.071504  | -0.991142 | -2.580342 | 5.090039  | -0.864439 | -2.579235 | 5.089962  | -0.835446 |
| C | -3.774187 | -0.798782 | 0.086127  | -3.750842 | -0.813668 | 0.067288  | -3.754906 | -0.811954 | 0.056089  |
| C | -4.409254 | -1.307928 | -1.051030 | -4.331173 | -1.328777 | -1.095747 | -4.321826 | -1.329463 | -1.111830 |
| C | -4.379550 | -0.915241 | 1.340809  | -4.400246 | -0.938412 | 1.298750  | -4.414338 | -0.935161 | 1.281842  |
| C | -5.651108 | -1.933792 | -0.929904 | -5.565545 | -1.976147 | -1.021607 | -5.556646 | -1.976989 | -1.048386 |
| H | -3.928637 | -1.210701 | -2.020069 | -3.816471 | -1.219482 | -2.045686 | -3.797437 | -1.222077 | -2.056577 |
| C | -5.621626 | -1.541615 | 1.456142  | -5.634451 | -1.586971 | 1.364523  | -5.648737 | -1.584256 | 1.336448  |
| C | -6.258581 | -2.051450 | 0.322404  | -6.218010 | -2.106176 | 0.206542  | -6.220794 | -2.105329 | 0.173632  |
| H | -6.143012 | -2.328313 | -1.815063 | -6.015977 | -2.377657 | -1.925315 | -5.998065 | -2.380061 | -1.955759 |
| H | -6.090268 | -1.630819 | 2.432615  | -6.137954 | -1.686184 | 2.322326  | -6.161401 | -1.682120 | 2.289453  |
| H | -7.225593 | -2.538859 | 0.414393  | -7.178923 | -2.610640 | 0.260988  | -7.181972 | -2.610064 | 0.219586  |
| C | 2.523841  | 0.769458  | 0.207669  | 2.531905  | 0.798315  | 0.197023  | 2.538484  | 0.792444  | 0.197410  |
| C | 3.900339  | 1.067641  | 0.316126  | 3.908332  | 1.066320  | 0.286623  | 3.916294  | 1.066812  | 0.272398  |
| C | 1.494718  | 1.720957  | 0.306517  | 1.497312  | 1.756730  | 0.268386  | 1.503874  | 1.753189  | 0.268726  |
| C | 4.282742  | 2.374321  | 0.618553  | 4.328943  | 2.389580  | 0.533496  | 4.333495  | 2.389805  | 0.510835  |
| C | 1.934046  | 3.021128  | 0.638581  | 1.977510  | 3.078511  | 0.547180  | 1.981621  | 3.071234  | 0.543391  |
| C | 3.286695  | 3.339852  | 0.798613  | 3.337498  | 3.368569  | 0.674346  | 3.342087  | 3.367126  | 0.660554  |
| H | 5.331943  | 2.638731  | 0.722996  | 5.381906  | 2.641608  | 0.614287  | 5.386509  | 2.645995  | 0.579697  |
| H | 1.202336  | 3.807237  | 0.793201  | 1.265494  | 3.884022  | 0.688735  | 1.269500  | 3.876559  | 0.684514  |
| H | 3.569431  | 4.357243  | 1.056452  | 3.637525  | 4.393759  | 0.883634  | 3.640850  | 4.393443  | 0.864786  |
| C | 3.634484  | -1.166956 | -0.188006 | 3.609675  | -1.183496 | -0.173621 | 3.610723  | -1.181319 | -0.176160 |
| C | 4.611888  | -0.163566 | 0.053110  | 4.595942  | -0.178308 | 0.048649  | 4.602763  | -0.177423 | 0.031573  |
| C | 4.025660  | -2.444923 | -0.603153 | 3.974029  | -2.464190 | -0.596524 | 3.972993  | -2.469305 | -0.588378 |
| C | 5.973420  | -0.465174 | -0.046102 | 5.952156  | -0.508651 | -0.058349 | 5.958104  | -0.509651 | -0.083271 |
| C | 5.390282  | -2.721290 | -0.702225 | 5.334896  | -2.769127 | -0.701702 | 5.329666  | -2.772919 | -0.702647 |
| H | 3.309979  | -3.204277 | -0.887361 | 3.243259  | -3.207765 | -0.888518 | 3.238739  | -3.215819 | -0.863534 |
| C | 6.359896  | -1.752297 | -0.410526 | 6.314542  | -1.806428 | -0.417791 | 6.315664  | -1.808970 | -0.433853 |

|                  |           |                      |           |           |                      |           |           |                      |           |
|------------------|-----------|----------------------|-----------|-----------|----------------------|-----------|-----------|----------------------|-----------|
| H                | 6.719003  | 0.302511             | 0.143578  | 6.714171  | 0.245566             | 0.118682  | 6.721882  | 0.245476             | 0.082490  |
| H                | 5.699986  | -3.711711            | -1.025411 | 5.628498  | -3.763027            | -1.027275 | 5.621128  | -3.768998            | -1.024046 |
| H                | 7.414595  | -2.000422            | -0.492273 | 7.366135  | -2.067022            | -0.506357 | 7.365703  | -2.073203            | -0.528485 |
| H                | -4.629553 | 1.399532             | -0.425895 | -4.636937 | 1.361243             | -0.375238 | -4.637381 | 1.358445             | -0.388366 |
| H                | -3.875431 | -0.515668            | 2.215860  | -3.937743 | -0.529691            | 2.192189  | -3.960401 | -0.525175            | 2.178991  |
| <b>DMACDPABN</b> |           | <b>S<sub>0</sub></b> |           |           | <b>S<sub>1</sub></b> |           |           | <b>T<sub>1</sub></b> |           |
| C                | -0.564448 | -2.467723            | 0.462832  | -0.580636 | -2.415670            | 0.588412  | -0.578957 | -2.403877            | 0.614657  |
| C                | 0.701460  | -3.027008            | 0.622280  | 0.672654  | -2.989016            | 0.795300  | 0.669406  | -2.979826            | 0.824240  |
| C                | 1.867954  | -2.282264            | 0.477613  | 1.831265  | -2.237216            | 0.618502  | 1.832614  | -2.225466            | 0.626284  |
| C                | 1.774322  | -0.910932            | 0.173385  | 1.747922  | -0.864571            | 0.247803  | 1.749999  | -0.863225            | 0.246823  |
| C                | 0.497620  | -0.299671            | 0.041782  | 0.490132  | -0.250945            | 0.076455  | 0.489941  | -0.238380            | 0.077138  |
| C                | -0.666503 | -1.102957            | 0.162023  | -0.652932 | -1.056605            | 0.196983  | -0.655638 | -1.052376            | 0.206649  |
| H                | -1.450223 | -3.078259            | 0.592909  | -1.483483 | -2.991130            | 0.757847  | -1.482766 | -2.978243            | 0.786172  |
| H                | 0.782424  | -4.081846            | 0.874024  | 0.749156  | -4.027765            | 1.101995  | 0.747270  | -4.014079            | 1.143728  |
| B                | 0.374356  | 1.197859             | -0.177540 | 0.362456  | 1.259541             | -0.181965 | 0.368138  | 1.256793             | -0.173972 |
| N                | 2.926894  | -0.133294            | 0.007818  | 2.905112  | -0.117894            | 0.047801  | 2.910528  | -0.116329            | 0.042836  |
| N                | -1.926777 | -0.497905            | 0.006666  | -1.912694 | -0.466378            | -0.011761 | -1.918370 | -0.463549            | -0.011005 |
| C                | 2.909266  | 1.198843             | -0.437318 | 2.911595  | 1.231725             | -0.408894 | 2.919154  | 1.232006             | -0.401288 |
| C                | 4.130935  | 1.841965             | -0.745314 | 4.142394  | 1.833681             | -0.713273 | 4.152574  | 1.834471             | -0.705782 |
| C                | 1.681127  | 1.909355             | -0.585704 | 1.680503  | 1.957845             | -0.545771 | 1.688485  | 1.961113             | -0.531588 |
| C                | 4.141057  | 3.135203             | -1.245367 | 4.198951  | 3.152400             | -1.181500 | 4.210366  | 3.151770             | -1.166245 |
| C                | 1.747730  | 3.212713             | -1.129743 | 1.796233  | 3.278551             | -1.053937 | 1.806530  | 3.281995             | -1.033113 |
| C                | 2.944013  | 3.828847             | -1.463658 | 3.017607  | 3.871462             | -1.363476 | 3.027709  | 3.873365             | -1.342334 |
| H                | 5.094957  | 3.599936             | -1.483888 | 5.164364  | 3.596844             | -1.408363 | 5.175164  | 3.596747             | -1.394068 |
| H                | 0.818265  | 3.741695             | -1.313687 | 0.886606  | 3.841830             | -1.233159 | 0.898748  | 3.849338             | -1.208039 |
| H                | 2.954297  | 4.830442             | -1.885180 | 3.047216  | 4.888881             | -1.747714 | 3.058305  | 4.892147             | -1.722696 |
| C                | 4.201191  | -0.757429            | 0.258192  | 4.174081  | -0.770954            | 0.242939  | 4.178454  | -0.775235            | 0.234018  |
| C                | 4.867255  | -1.435930            | -0.767772 | 4.768431  | -1.480932            | -0.805635 | 4.766996  | -1.483524            | -0.818353 |
| C                | 4.767021  | -0.685157            | 1.534477  | 4.807226  | -0.693888            | 1.487271  | 4.812915  | -0.704513            | 1.477674  |
| C                | 6.099917  | -2.039861            | -0.514247 | 5.993767  | -2.118459            | -0.604365 | 5.991689  | -2.123666            | -0.622259 |
| C                | 6.000116  | -1.290549            | 1.782669  | 6.032917  | -1.332842            | 1.682249  | 6.037840  | -1.346475            | 1.667133  |
| C                | 6.667810  | -1.968062            | 0.759961  | 6.627394  | -2.045576            | 0.638344  | 6.628449  | -2.056271            | 0.619175  |
| H                | 6.615604  | -2.565873            | -1.313359 | 6.452593  | -2.671000            | -1.420080 | 6.447473  | -2.673970            | -1.441097 |
| H                | 6.437693  | -1.232248            | 2.775780  | 6.521620  | -1.273473            | 2.651152  | 6.529019  | -1.291351            | 2.634976  |
| H                | 7.627815  | -2.438698            | 0.955124  | 7.581612  | -2.542369            | 0.792619  | 7.582214  | -2.555137            | 0.769241  |
| C                | -2.114817 | 0.876900             | 0.250068  | -2.136543 | 0.921406             | 0.256598  | -2.138663 | 0.918661             | 0.244247  |
| C                | -3.414271 | 1.297696             | 0.622863  | -3.440689 | 1.303874             | 0.603658  | -3.448094 | 1.308607             | 0.582569  |
| C                | -1.029858 | 1.784775             | 0.128724  | -1.044975 | 1.832043             | 0.110212  | -1.043919 | 1.830174             | 0.105810  |
| C                | -3.623089 | 2.661783             | 0.821904  | -3.692478 | 2.676329             | 0.790684  | -3.696337 | 2.677437             | 0.761829  |
| C                | -1.300931 | 3.142408             | 0.399081  | -1.367354 | 3.191675             | 0.339394  | -1.365655 | 3.189221             | 0.333144  |
| C                | -2.576200 | 3.584091             | 0.717847  | -2.658396 | 3.603266             | 0.656974  | -2.657023 | 3.603438             | 0.637068  |
| H                | -4.606319 | 3.022906             | 1.102434  | -4.686423 | 3.024097             | 1.043754  | -4.690307 | 3.029487             | 1.008993  |
| H                | -0.486143 | 3.858275             | 0.377060  | -0.580943 | 3.936033             | 0.283648  | -0.577220 | 3.932072             | 0.287575  |
| H                | -2.763565 | 4.637137             | 0.912150  | -2.866062 | 4.660270             | 0.810788  | -2.864101 | 4.660632             | 0.790135  |
| C                | -3.023988 | -1.193603            | -0.573516 | -2.962382 | -1.192717            | -0.586207 | -2.970546 | -1.198261            | -0.581570 |
| C                | -4.329965 | -0.829439            | -0.193440 | -4.293448 | -0.846013            | -0.246368 | -4.300104 | -0.852096            | -0.244963 |

|                  |           |                      |           |           |                      |           |           |                      |           |
|------------------|-----------|----------------------|-----------|-----------|----------------------|-----------|-----------|----------------------|-----------|
| C                | -2.819640 | -2.141738            | -1.587679 | -2.702069 | -2.193191            | -1.547433 | -2.707420 | -2.202052            | -1.535162 |
| C                | -5.403884 | -1.459593            | -0.834158 | -5.324845 | -1.545345            | -0.876626 | -5.331614 | -1.557114            | -0.870314 |
| C                | -3.904503 | -2.767109            | -2.194529 | -3.751805 | -2.877269            | -2.144906 | -3.756208 | -2.891006            | -2.130505 |
| H                | -1.811344 | -2.378263            | -1.907608 | -1.679735 | -2.390992            | -1.848514 | -1.683984 | -2.403940            | -1.829495 |
| C                | -5.203785 | -2.429410            | -1.816142 | -5.068787 | -2.555599            | -1.808608 | -5.073873 | -2.571641            | -1.796139 |
| H                | -6.420348 | -1.195641            | -0.564874 | -6.356486 | -1.310875            | -0.641180 | -6.363515 | -1.321874            | -0.636535 |
| H                | -3.729786 | -3.501156            | -2.976947 | -3.542143 | -3.637256            | -2.892493 | -3.544102 | -3.655608            | -2.872750 |
| H                | -6.058184 | -2.907716            | -2.287599 | -5.898193 | -3.076777            | -2.278765 | -5.902013 | -3.098455            | -2.262257 |
| C                | -4.481003 | 0.229928             | 0.899299  | -4.503361 | 0.220852             | 0.827035  | -4.511581 | 0.227881             | 0.815434  |
| C                | -5.900557 | 0.816410             | 0.951402  | -5.933345 | 0.786341             | 0.803756  | -5.940856 | 0.794288             | 0.783733  |
| H                | -5.987194 | 1.549836             | 1.757308  | -6.066382 | 1.526965             | 1.595831  | -6.075841 | 1.542904             | 1.567994  |
| H                | -6.180563 | 1.301725             | 0.011127  | -6.172260 | 1.258292             | -0.154213 | -6.177629 | 1.256274             | -0.179627 |
| H                | -6.633474 | 0.034399             | 1.167498  | -6.666160 | -0.002303            | 0.994546  | -6.674220 | 0.007785             | 0.980750  |
| C                | -4.186606 | -0.422065            | 2.281435  | -4.273418 | -0.425869            | 2.226339  | -4.282573 | -0.401327            | 2.222365  |
| H                | -4.257976 | 0.329568             | 3.074989  | -4.391387 | 0.330565             | 3.008990  | -4.402285 | 0.363543             | 2.996589  |
| H                | -4.915851 | -1.213407            | 2.487169  | -5.002583 | -1.224736            | 2.401653  | -5.011646 | -1.198474            | 2.405147  |
| H                | -3.187448 | -0.861801            | 2.320962  | -3.271003 | -0.851016            | 2.318297  | -3.280346 | -0.825397            | 2.320704  |
| H                | 5.072636  | 1.325268             | -0.611784 | 5.068410  | 1.286589             | -0.591612 | 5.076998  | 1.283328             | -0.590509 |
| H                | 4.239186  | -0.156295            | 2.322660  | 4.336731  | -0.135699            | 2.291280  | 4.345258  | -0.148619            | 2.284853  |
| H                | 2.827000  | -2.767818            | 0.599572  | 2.792841  | -2.707388            | 0.778776  | 2.794564  | -2.695554            | 0.785233  |
| H                | 4.417469  | -1.485555            | -1.755046 | 4.269238  | -1.528019            | -1.768972 | 4.264802  | -1.526952            | -1.780229 |
| <b>TMCzDPABN</b> |           | <b>S<sub>0</sub></b> |           |           | <b>S<sub>1</sub></b> |           |           | <b>T<sub>1</sub></b> |           |
| C                | 0.541340  | -2.669320            | 0.328114  | 0.541419  | -2.648348            | 0.420936  | 0.536333  | -2.639515            | 0.450165  |
| C                | -0.741164 | -3.209197            | 0.412374  | -0.724440 | -3.205282            | 0.510803  | -0.729789 | -3.200282            | 0.543657  |
| C                | -1.881012 | -2.432268            | 0.269949  | -1.858813 | -2.413208            | 0.339609  | -1.864069 | -2.406671            | 0.357764  |
| C                | -1.750806 | -1.042380            | 0.071284  | -1.727971 | -1.014458            | 0.117889  | -1.730549 | -1.015637            | 0.125047  |
| C                | -0.459643 | -0.444659            | 0.006084  | -0.451861 | -0.408447            | 0.044549  | -0.451676 | -0.402939            | 0.053581  |
| C                | 0.684136  | -1.298817            | 0.091507  | 0.675960  | -1.260864            | 0.132025  | 0.675554  | -1.264334            | 0.146994  |
| H                | 1.395120  | -3.306305            | 0.503380  | 1.409205  | -3.254394            | 0.636564  | 1.403671  | -3.247868            | 0.664678  |
| H                | -0.851172 | -4.274327            | 0.601155  | -0.837090 | -4.261086            | 0.736829  | -0.842329 | -4.253609            | 0.779459  |
| H                | -2.853517 | -2.901374            | 0.329683  | -2.835406 | -2.872118            | 0.412682  | -2.841694 | -2.863828            | 0.429703  |
| B                | -0.334862 | 1.079455             | -0.058190 | -0.319888 | 1.128700             | -0.039741 | -0.323648 | 1.121224             | -0.030782 |
| N                | -2.897416 | -0.246439            | -0.038638 | -2.879312 | -0.238716            | -0.010303 | -2.882672 | -0.236555            | -0.013692 |
| N                | 1.947133  | -0.697741            | -0.021010 | 1.933630  | -0.686648            | 0.012432  | 1.941021  | -0.686567            | 0.019042  |
| C                | -2.873346 | 1.128606             | -0.314419 | -2.878874 | 1.153710             | -0.271585 | -2.880259 | 1.152163             | -0.269505 |
| C                | -4.089839 | 1.811565             | -0.549977 | -4.107257 | 1.803482             | -0.497670 | -4.109056 | 1.803483             | -0.500782 |
| C                | -1.640997 | 1.841452             | -0.360017 | -1.646435 | 1.878974             | -0.305270 | -1.644120 | 1.877208             | -0.292027 |
| C                | -4.089647 | 3.160418             | -0.869280 | -4.145201 | 3.169428             | -0.782487 | -4.146520 | 3.168256             | -0.776552 |
| C                | -1.697251 | 3.208155             | -0.719697 | -1.741708 | 3.251400             | -0.625466 | -1.741449 | 3.253232             | -0.603343 |
| C                | -2.887221 | 3.871300             | -0.974763 | -2.956505 | 3.895707             | -0.857803 | -2.954101 | 3.894952             | -0.838501 |
| H                | -5.038747 | 3.658299             | -1.053810 | -5.104144 | 3.651715             | -0.952115 | -5.103346 | 3.652617             | -0.950753 |
| H                | -0.765215 | 3.752253             | -0.824174 | -0.826114 | 3.824269             | -0.715360 | -0.827487 | 3.829444             | -0.685517 |
| H                | -2.888833 | 4.921721             | -1.253307 | -2.974321 | 4.956429             | -1.096834 | -2.971618 | 4.957030             | -1.071936 |
| C                | -4.180137 | -0.887541            | 0.109780  | -4.157934 | -0.901550            | 0.083533  | -4.162234 | -0.901016            | 0.073176  |
| C                | -4.819600 | -1.445121            | -1.002014 | -4.739813 | -1.463840            | -1.056816 | -4.734585 | -1.465311            | -1.070426 |
| C                | -4.781711 | -0.948513            | 1.370200  | -4.808510 | -0.974047            | 1.318678  | -4.819731 | -0.972294            | 1.304287  |

|                |           |                      |           |                      |           |           |                      |           |           |
|----------------|-----------|----------------------|-----------|----------------------|-----------|-----------|----------------------|-----------|-----------|
| C              | -6.061767 | -2.063465            | -0.849832 | -5.975404            | -2.105371 | -0.956298 | -5.970850            | -2.106577 | -0.977428 |
| H              | -4.341839 | -1.390919            | -1.975807 | -4.224790            | -1.395096 | -2.010403 | -4.212517            | -1.398365 | -2.020217 |
| C              | -6.024135 | -1.567712            | 1.516717  | -6.044006            | -1.616885 | 1.411369  | -6.055724            | -1.615143 | 1.389136  |
| C              | -6.665358 | -2.125639            | 0.408356  | -6.628470            | -2.182878 | 0.275969  | -6.632301            | -2.182476 | 0.250435  |
| H              | -6.557033 | -2.495648            | -1.715330 | -6.426442            | -2.543429 | -1.842622 | -6.415694            | -2.545755 | -1.866259 |
| H              | -6.489707 | -1.613727            | 2.497651  | -6.547965            | -1.675095 | 2.372348  | -6.566255            | -1.672056 | 2.346665  |
| H              | -7.632627 | -2.607353            | 0.524574  | -7.590413            | -2.682789 | 0.351124  | -7.594731            | -2.682260 | 0.319614  |
| C              | 2.116045  | 0.674304             | 0.145932  | 2.125299             | 0.703942  | 0.154301  | 2.130657             | 0.697883  | 0.158684  |
| C              | 3.491093  | 0.980993             | 0.237878  | 3.499763             | 0.979412  | 0.228696  | 3.506674             | 0.979733  | 0.223494  |
| C              | 1.093487  | 1.632884             | 0.196819  | 1.096426             | 1.667715  | 0.181459  | 1.099900             | 1.662908  | 0.186232  |
| C              | 3.871794  | 2.300354             | 0.468723  | 3.918878             | 2.310546  | 0.411276  | 3.920649             | 2.309674  | 0.404663  |
| C              | 1.538097  | 2.948083             | 0.457732  | 1.580092             | 2.996972  | 0.397185  | 1.579658             | 2.989918  | 0.405280  |
| C              | 2.889322  | 3.296989             | 0.603322  | 2.940404             | 3.316196  | 0.515461  | 2.937854             | 3.314492  | 0.515977  |
| H              | 4.924099  | 2.562440             | 0.555730  | 4.974475             | 2.559733  | 0.475227  | 4.975518             | 2.563904  | 0.462608  |
| H              | 0.801697  | 3.737598             | 0.569702  | 0.863258             | 3.804897  | 0.497928  | 0.861261             | 3.795677  | 0.509375  |
| C              | 3.229658  | -1.276884            | -0.144516 | 3.202161             | -1.288822 | -0.126025 | 3.205185             | -1.285605 | -0.126019 |
| C              | 4.204657  | -0.262794            | 0.041170  | 4.188478             | -0.275973 | 0.045797  | 4.195477             | -0.274022 | 0.037854  |
| C              | 3.633537  | -2.570752            | -0.490589 | 3.577420             | -2.585119 | -0.489843 | 3.579770             | -2.586765 | -0.482116 |
| C              | 5.566930  | -0.564632            | -0.043267 | 5.543675             | -0.607590 | -0.049168 | 5.551072             | -0.607056 | -0.060926 |
| C              | 4.998692  | -2.841664            | -0.574113 | 4.937153             | -2.885673 | -0.583052 | 4.936176             | -2.885594 | -0.580822 |
| H              | 2.926766  | -3.351506            | -0.737352 | 2.853115             | -3.347414 | -0.748082 | 2.853257             | -3.350888 | -0.728226 |
| C              | 5.984616  | -1.864965            | -0.336136 | 5.935415             | -1.918227 | -0.347175 | 5.939142             | -1.917069 | -0.353491 |
| H              | 6.303701  | 0.221472             | 0.104015  | 6.298680             | 0.161907  | 0.091485  | 6.306927             | 0.162718  | 0.073990  |
| H              | 5.307299  | -3.848393            | -0.846744 | 5.228408             | -3.893835 | -0.866618 | 5.226929             | -3.894765 | -0.861923 |
| H              | -5.034570 | 1.286132             | -0.498292 | -5.038541            | 1.253888  | -0.458489 | -5.039216            | 1.251417  | -0.472370 |
| H              | -4.274277 | -0.511858            | 2.225384  | -4.345357            | -0.529342 | 2.194449  | -4.362424            | -0.526708 | 2.182602  |
| C              | 3.294542  | 4.721841             | 0.901177  | 3.364503             | 4.742937  | 0.774802  | 3.364545             | 4.744174  | 0.748927  |
| H              | 4.056993  | 5.078310             | 0.198395  | 4.254238             | 5.009007  | 0.192768  | 4.049529             | 5.088517  | -0.035968 |
| H              | 2.440529  | 5.402762             | 0.839844  | 2.570935             | 5.452710  | 0.521797  | 2.508052             | 5.424129  | 0.768180  |
| H              | 3.719237  | 4.815335             | 1.908941  | 3.616987             | 4.896070  | 1.832809  | 3.897199             | 4.849657  | 1.702732  |
| C              | 7.449758  | -2.221219            | -0.405616 | 7.393390             | -2.294121 | -0.431006 | 7.395500             | -2.297797 | -0.446928 |
| H              | 7.673838  | -2.831983            | -1.287562 | 7.606187             | -2.876655 | -1.334989 | 7.611069             | -2.832630 | -1.379607 |
| H              | 8.078516  | -1.326778            | -0.448120 | 8.037644             | -1.410167 | -0.439508 | 8.044995             | -1.418652 | -0.405378 |
| H              | 7.761624  | -2.800596            | 0.473255  | 7.693271             | -2.913471 | 0.424779  | 7.685910             | -2.963848 | 0.376088  |
| <b>PXZCzBN</b> |           | <b>S<sub>0</sub></b> |           | <b>S<sub>1</sub></b> |           |           | <b>T<sub>1</sub></b> |           |           |
| C              | 1.798115  | -2.026721            | 0.252777  | -1.776030            | -2.033805 | -0.294245 | -1.768471            | -2.032621 | -0.279166 |
| C              | 0.691920  | -2.878661            | 0.386238  | -0.672710            | -2.880360 | -0.496273 | -0.658789            | -2.883220 | -0.485897 |
| C              | -0.604684 | -2.372984            | 0.313100  | 0.619314             | -2.344880 | -0.413688 | 0.626428             | -2.347125 | -0.403571 |
| C              | -0.832081 | -0.988499            | 0.122272  | 0.817837             | -0.981487 | -0.113857 | 0.822329             | -0.980125 | -0.106603 |
| C              | 0.261666  | -0.100546            | 0.007823  | -0.261072            | -0.093117 | 0.030813  | -0.259360            | -0.086182 | 0.036321  |
| C              | 1.537520  | -0.663977            | 0.048684  | -1.523475            | -0.668653 | -0.023038 | -1.521247            | -0.669313 | -0.009918 |
| H              | 0.830713  | -3.940883            | 0.570965  | -0.803839            | -3.930971 | -0.736250 | -0.791637            | -3.931358 | -0.734106 |
| H              | -1.438599 | -3.049461            | 0.456103  | 1.466858             | -2.991835 | -0.611657 | 1.476020             | -2.990614 | -0.604637 |
| B              | 0.141186  | 1.406903             | -0.013198 | -0.152578            | 1.428704  | 0.047373  | -0.154769            | 1.428773  | 0.039091  |
| N              | -2.112299 | -0.425810            | 0.098633  | 2.122233             | -0.398512 | -0.035596 | 2.122386             | -0.392474 | -0.033109 |
| N              | 2.715331  | 0.060077             | -0.047089 | -2.702841            | 0.042536  | 0.106901  | -2.704581            | 0.040924  | 0.108890  |

|   |           |           |           |           |           |           |           |           |           |
|---|-----------|-----------|-----------|-----------|-----------|-----------|-----------|-----------|-----------|
| C | -2.308010 | 0.936711  | 0.415161  | 2.318198  | 0.955395  | -0.430313 | 2.315895  | 0.961324  | -0.424605 |
| C | -3.601376 | 1.307672  | 0.837561  | 3.606372  | 1.320407  | -0.845498 | 3.605921  | 1.329108  | -0.833329 |
| C | -1.271364 | 1.910133  | 0.377261  | 1.265877  | 1.914241  | -0.406851 | 1.253018  | 1.919170  | -0.405724 |
| C | -3.888655 | 2.606046  | 1.224392  | 3.899912  | 2.604816  | -1.319875 | 3.900564  | 2.616822  | -1.300230 |
| C | -1.594922 | 3.218742  | 0.808656  | 1.592419  | 3.190640  | -0.896539 | 1.586690  | 3.200768  | -0.884592 |
| C | -2.871195 | 3.568100  | 1.221305  | 2.874483  | 3.536647  | -1.353752 | 2.871008  | 3.545599  | -1.329691 |
| H | -4.895564 | 2.839459  | 1.556602  | 4.914601  | 2.835751  | -1.626255 | 4.915513  | 2.852030  | -1.601067 |
| H | -0.808079 | 3.963807  | 0.851195  | 0.815384  | 3.946600  | -0.932316 | 0.810156  | 3.956762  | -0.926566 |
| H | -3.087539 | 4.579381  | 1.554421  | 3.068605  | 4.541565  | -1.718099 | 3.066483  | 4.552997  | -1.687612 |
| C | -3.261048 | -1.134398 | -0.349822 | 3.232192  | -1.100715 | 0.409124  | 3.236532  | -1.097968 | 0.403831  |
| C | -3.220621 | -2.174944 | -1.286444 | 3.171476  | -2.220874 | 1.267185  | 3.172173  | -2.216625 | 1.263302  |
| C | -4.514619 | -0.710492 | 0.115161  | 4.517772  | -0.663343 | -0.008106 | 4.517347  | -0.661389 | -0.017957 |
| C | -4.391858 | -2.832986 | -1.664287 | 4.329848  | -2.893198 | 1.629413  | 4.327949  | -2.893174 | 1.620502  |
| H | -2.271687 | -2.474871 | -1.714808 | 2.211469  | -2.540221 | 1.652892  | 2.211982  | -2.527160 | 1.655306  |
| C | -5.686905 | -1.358113 | -0.262145 | 5.676679  | -1.350459 | 0.345904  | 5.675138  | -1.356577 | 0.326846  |
| C | -5.623838 | -2.440070 | -1.140397 | 5.584826  | -2.475426 | 1.159026  | 5.581093  | -2.480776 | 1.139004  |
| H | -4.334106 | -3.649972 | -2.377774 | 4.258027  | -3.747494 | 2.296251  | 4.257652  | -3.744388 | 2.291032  |
| H | -6.630905 | -0.997531 | 0.134437  | 6.630108  | -0.979445 | -0.015999 | 6.628810  | -0.989855 | -0.038389 |
| H | -6.535852 | -2.954836 | -1.428514 | 6.484614  | -3.012285 | 1.443150  | 6.480162  | -3.021810 | 1.417434  |
| C | 2.700236  | 1.418867  | -0.423415 | -2.696157 | 1.412400  | 0.495455  | -2.703085 | 1.412281  | 0.484843  |
| C | 3.863458  | 2.039319  | -0.912630 | -3.850077 | 2.004068  | 1.015594  | -3.861646 | 2.005021  | 0.999782  |
| C | 1.465664  | 2.146126  | -0.368665 | -1.462003 | 2.156332  | 0.384636  | -1.475428 | 2.157715  | 0.377803  |
| C | 3.845744  | 3.375381  | -1.294587 | -3.871824 | 3.361633  | 1.351960  | -3.883374 | 3.360160  | 1.333759  |
| C | 1.504436  | 3.495158  | -0.783469 | -1.548197 | 3.532501  | 0.738499  | -1.558372 | 3.527822  | 0.734660  |
| C | 2.665023  | 4.119047  | -1.222927 | -2.715203 | 4.131487  | 1.191601  | -2.727739 | 4.130582  | 1.181768  |
| H | 4.757985  | 3.827673  | -1.675716 | -4.782655 | 3.799791  | 1.750773  | -4.796339 | 3.798446  | 1.728205  |
| H | 0.577304  | 4.058622  | -0.793696 | -0.643855 | 4.131929  | 0.696484  | -0.652597 | 4.125316  | 0.696971  |
| H | 2.648381  | 5.159760  | -1.535046 | -2.720005 | 5.187571  | 1.452400  | -2.733202 | 5.186159  | 1.443564  |
| C | 3.779873  | -0.843746 | 0.179928  | -3.756846 | -0.853117 | -0.153615 | -3.753518 | -0.858028 | -0.152743 |
| C | 5.152248  | -0.629192 | 0.346053  | -5.131622 | -0.642876 | -0.303880 | -5.128984 | -0.654093 | -0.309899 |
| C | 3.234331  | -2.152590 | 0.335194  | -3.207868 | -2.157627 | -0.369306 | -3.195980 | -2.161221 | -0.361773 |
| C | 5.972302  | -1.730767 | 0.595886  | -5.945954 | -1.738730 | -0.597567 | -5.936756 | -1.753536 | -0.603713 |
| C | 4.078901  | -3.240862 | 0.580063  | -4.049413 | -3.240412 | -0.655610 | -4.033878 | -3.249219 | -0.649167 |
| C | 5.449520  | -3.027445 | 0.695668  | -5.420890 | -3.030768 | -0.754981 | -5.403956 | -3.044822 | -0.755139 |
| H | 7.038917  | -1.568719 | 0.726567  | -7.014261 | -1.576250 | -0.715147 | -7.005169 | -1.596672 | -0.727450 |
| H | 3.664127  | -4.239009 | 0.693279  | -3.628804 | -4.230419 | -0.812070 | -3.608823 | -4.238112 | -0.800343 |
| H | 6.114880  | -3.865164 | 0.886119  | -6.084868 | -3.861790 | -0.976121 | -6.063971 | -3.878891 | -0.977155 |
| H | 4.771769  | 1.471950  | -1.053468 | -4.733982 | 1.409714  | 1.202228  | -4.745348 | 1.410237  | 1.185699  |
| H | 5.589621  | 0.359837  | 0.329351  | -5.573526 | 0.341877  | -0.236548 | -5.575806 | 0.328911  | -0.248003 |
| O | -4.612150 | 0.374963  | 0.949848  | 4.657012  | 0.439987  | -0.792877 | 4.655790  | 0.447855  | -0.791380 |

**PTZCzBN**

|   | <b>S<sub>0</sub></b> |           |           | <b>S<sub>1</sub></b> |           |           | <b>T<sub>1</sub></b> |           |           |
|---|----------------------|-----------|-----------|----------------------|-----------|-----------|----------------------|-----------|-----------|
| C | -1.934953            | -2.000576 | -0.345229 | -1.918790            | -1.998346 | -0.415229 | -1.901545            | -2.002065 | -0.389125 |
| C | -0.828941            | -2.852793 | -0.483303 | -0.815874            | -2.838106 | -0.658113 | -0.787641            | -2.843813 | -0.618482 |
| C | 0.468055             | -2.348243 | -0.392767 | 0.478084             | -2.310945 | -0.550516 | 0.495809             | -2.310396 | -0.506487 |
| C | 0.692319             | -0.967983 | -0.182774 | 0.676054             | -0.964863 | -0.187592 | 0.685850             | -0.951848 | -0.164734 |
| C | -0.398048            | -0.085393 | -0.046365 | -0.397630            | -0.086410 | 0.009943  | -0.396969            | -0.071346 | 0.014957  |

|   |           |           |           |           |           |           |           |           |           |
|---|-----------|-----------|-----------|-----------|-----------|-----------|-----------|-----------|-----------|
| C | -1.673950 | -0.643897 | -0.106242 | -1.662914 | -0.652591 | -0.074517 | -1.657482 | -0.651292 | -0.062181 |
| H | -0.968082 | -3.912415 | -0.682001 | -0.950805 | -3.876751 | -0.944165 | -0.918022 | -3.883447 | -0.901703 |
| H | 1.308011  | -3.020981 | -0.524349 | 1.329169  | -2.951014 | -0.760500 | 1.352806  | -2.945277 | -0.707473 |
| B | -0.264948 | 1.416557  | 0.052955  | -0.270266 | 1.425186  | 0.107060  | -0.280587 | 1.436050  | 0.101130  |
| N | 1.984738  | -0.419588 | -0.145908 | 1.991552  | -0.395065 | -0.074669 | 1.989074  | -0.375508 | -0.057043 |
| N | -2.848796 | 0.079937  | 0.015401  | -2.837414 | 0.058731  | 0.095871  | -2.839229 | 0.053319  | 0.089520  |
| C | 2.188427  | 0.950419  | -0.446087 | 2.196301  | 0.957830  | -0.484664 | 2.191278  | 0.980358  | -0.454486 |
| C | 3.461259  | 1.332259  | -0.926435 | 3.451469  | 1.342254  | -0.983892 | 3.451498  | 1.366328  | -0.945689 |
| C | 1.152372  | 1.923767  | -0.323650 | 1.136831  | 1.915137  | -0.370822 | 1.121032  | 1.934570  | -0.350689 |
| C | 3.732342  | 2.663199  | -1.234378 | 3.697032  | 2.658947  | -1.425462 | 3.696688  | 2.687908  | -1.372856 |
| C | 1.461676  | 3.249938  | -0.700590 | 1.427462  | 3.211677  | -0.827820 | 1.418095  | 3.238155  | -0.793335 |
| C | 2.725269  | 3.626934  | -1.130575 | 2.673682  | 3.587852  | -1.348064 | 2.669212  | 3.614467  | -1.293826 |
| H | 4.720612  | 2.935317  | -1.594207 | 4.681614  | 2.930864  | -1.793022 | 4.682541  | 2.965548  | -1.731644 |
| H | 0.673243  | 3.994551  | -0.680472 | 0.644562  | 3.961336  | -0.782214 | 0.632509  | 3.985312  | -0.759776 |
| H | 2.932364  | 4.657368  | -1.406194 | 2.841641  | 4.609521  | -1.677705 | 2.840944  | 4.638893  | -1.614110 |
| C | 3.043119  | -1.139594 | 0.489134  | 3.008152  | -1.117631 | 0.533414  | 3.018772  | -1.111495 | 0.528234  |
| C | 2.798872  | -1.946347 | 1.610949  | 2.730331  | -2.086624 | 1.528812  | 2.743140  | -2.067275 | 1.535030  |
| C | 4.364779  | -0.994117 | 0.039953  | 4.372179  | -0.908200 | 0.179345  | 4.371689  | -0.918148 | 0.143718  |
| C | 3.835619  | -2.657707 | 2.210911  | 3.749092  | -2.820099 | 2.110158  | 3.759412  | -2.822473 | 2.092376  |
| H | 1.791363  | -2.025012 | 2.003668  | 1.705118  | -2.231081 | 1.846133  | 1.723128  | -2.183315 | 1.879995  |
| C | 5.407326  | -1.690111 | 0.660489  | 5.392403  | -1.665922 | 0.774027  | 5.389538  | -1.700966 | 0.709177  |
| C | 5.141405  | -2.543062 | 1.729570  | 5.088055  | -2.624248 | 1.729492  | 5.088804  | -2.655797 | 1.669671  |
| H | 3.620293  | -3.290423 | 3.067521  | 3.505393  | -3.543217 | 2.883315  | 3.522667  | -3.535975 | 2.876196  |
| H | 6.423553  | -1.556006 | 0.301162  | 6.423216  | -1.486451 | 0.482919  | 6.416907  | -1.540594 | 0.395881  |
| H | 5.952390  | -3.094250 | 2.197205  | 5.882283  | -3.202991 | 2.190909  | 5.883810  | -3.251415 | 2.108016  |
| C | -2.826814 | 1.420863  | 0.452021  | -2.816724 | 1.405452  | 0.556136  | -2.833276 | 1.404267  | 0.534294  |
| C | -3.990499 | 2.026463  | 0.958717  | -3.966843 | 1.980171  | 1.105898  | -3.993575 | 1.974882  | 1.071002  |
| C | -1.586656 | 2.143206  | 0.442675  | -1.577012 | 2.144730  | 0.489911  | -1.601904 | 2.150327  | 0.476474  |
| C | -3.967472 | 3.341545  | 1.407031  | -3.975459 | 3.315246  | 1.519008  | -4.011560 | 3.308973  | 1.479824  |
| C | -1.620933 | 3.469762  | 0.925374  | -1.649144 | 3.495905  | 0.925004  | -1.681239 | 3.497414  | 0.910847  |
| C | -2.780991 | 4.079101  | 1.385541  | -2.811390 | 4.081415  | 1.409121  | -2.851068 | 4.080553  | 1.382557  |
| H | -4.880720 | 3.780859  | 1.800693  | -4.883645 | 3.738882  | 1.939304  | -4.926051 | 3.729182  | 1.890163  |
| H | -0.690280 | 4.025541  | 0.972936  | -0.737681 | 4.086335  | 0.920878  | -0.771981 | 4.090997  | 0.914368  |
| H | -2.760161 | 5.102342  | 1.750563  | -2.806048 | 5.120115  | 1.731911  | -2.853393 | 5.119333  | 1.704509  |
| C | -3.915493 | -0.815568 | -0.236918 | -3.896551 | -0.818286 | -0.205585 | -3.888257 | -0.834366 | -0.212273 |
| C | -5.287527 | -0.594139 | -0.395489 | -5.271595 | -0.595733 | -0.337223 | -5.263438 | -0.624828 | -0.360376 |
| C | -3.372307 | -2.120566 | -0.430951 | -3.352549 | -2.111789 | -0.491633 | -3.329163 | -2.127072 | -0.478673 |
| C | -6.109701 | -1.686763 | -0.676240 | -6.092056 | -1.671297 | -0.682658 | -6.070933 | -1.711041 | -0.702047 |
| C | -4.218853 | -3.199666 | -0.706368 | -4.200706 | -3.174383 | -0.829505 | -4.166800 | -3.201656 | -0.813527 |
| C | -5.589360 | -2.980741 | -0.814131 | -5.571842 | -2.954846 | -0.910266 | -5.537186 | -2.993659 | -0.910303 |
| H | -7.176102 | -1.519092 | -0.801391 | -7.160382 | -1.499299 | -0.785719 | -7.139467 | -1.549554 | -0.818417 |
| H | -3.805739 | -4.194634 | -0.849477 | -3.785145 | -4.156564 | -1.039899 | -3.741167 | -4.182612 | -1.008435 |
| H | -6.256292 | -3.811379 | -1.028467 | -6.239874 | -3.771126 | -1.171045 | -6.196525 | -3.817650 | -1.168965 |
| S | 4.680922  | 0.100405  | -1.312055 | 4.799354  | 0.221900  | -1.080274 | 4.791609  | 0.242099  | -1.091682 |
| H | -4.904689 | 1.460665  | 1.061784  | -4.857569 | 1.385831  | 1.256053  | -4.881914 | 1.375956  | 1.216520  |
| H | -5.723414 | 0.394701  | -0.350561 | -5.709436 | 0.385839  | -0.216741 | -5.711184 | 0.354120  | -0.255640 |

| DPACzBN | $S_0$     |           |           | $S_1$     |           |           | $T_1$     |           |           |
|---------|-----------|-----------|-----------|-----------|-----------|-----------|-----------|-----------|-----------|
| C       | -1.500598 | -2.064189 | -0.019849 | 1.486825  | -2.083655 | 0.048388  | 1.492327  | -2.073850 | 0.024368  |
| C       | -0.331143 | -2.835936 | -0.081411 | 0.320474  | -2.868080 | 0.106152  | 0.320905  | -2.873338 | 0.067635  |
| C       | 0.919433  | -2.225625 | -0.110163 | -0.911586 | -2.229215 | 0.129731  | -0.912765 | -2.234344 | 0.086584  |
| C       | 1.040787  | -0.812224 | -0.054955 | -1.022154 | -0.792937 | 0.071108  | -1.021521 | -0.811772 | 0.043910  |
| C       | -0.120683 | -0.005178 | -0.027843 | 0.126025  | 0.014052  | 0.034335  | 0.132100  | 0.016869  | 0.013613  |
| C       | -1.347732 | -0.671021 | -0.028602 | 1.333725  | -0.659287 | 0.052786  | 1.342943  | -0.658704 | 0.038443  |
| H       | -0.385130 | -3.921676 | -0.098522 | 0.367986  | -3.952164 | 0.120401  | 0.375936  | -3.956320 | 0.072465  |
| H       | 1.801877  | -2.851194 | -0.147492 | -1.807726 | -2.834909 | 0.170801  | -1.808928 | -2.841556 | 0.116163  |
| B       | -0.103678 | 1.501055  | 0.080432  | 0.118799  | 1.543406  | -0.088081 | 0.119939  | 1.526588  | -0.097860 |
| N       | 2.281050  | -0.177737 | -0.014984 | -2.260115 | -0.173873 | 0.026147  | -2.263518 | -0.174135 | 0.010813  |
| N       | -2.580005 | -0.036475 | 0.015313  | 2.560119  | -0.042657 | 0.018281  | 2.574101  | -0.034709 | 0.009527  |
| C       | 2.432941  | 1.203019  | 0.215573  | -2.436729 | 1.230767  | -0.182934 | -2.436757 | 1.222082  | -0.200478 |
| C       | 3.742318  | 1.723215  | 0.350954  | -3.749586 | 1.717980  | -0.282869 | -3.752614 | 1.710804  | -0.308326 |
| C       | 1.307254  | 2.082509  | 0.331965  | -1.307447 | 2.114660  | -0.303523 | -1.310278 | 2.107751  | -0.319982 |
| C       | 3.948709  | 3.057156  | 0.662049  | -3.997499 | 3.070045  | -0.557708 | -3.998696 | 3.059830  | -0.592604 |
| C       | 1.580421  | 3.424235  | 0.691002  | -1.619341 | 3.455096  | -0.628123 | -1.617768 | 3.440536  | -0.651714 |
| C       | 2.862902  | 3.919458  | 0.860863  | -2.926513 | 3.935150  | -0.752159 | -2.928427 | 3.921721  | -0.787081 |
| H       | 4.967309  | 3.422670  | 0.768649  | -5.023293 | 3.420998  | -0.629021 | -5.024011 | 3.410327  | -0.670792 |
| H       | 0.743542  | 4.091782  | 0.863597  | -0.803706 | 4.145952  | -0.806642 | -0.802512 | 4.132722  | -0.826934 |
| H       | 3.024209  | 4.957159  | 1.140268  | -3.099110 | 4.981299  | -0.994815 | -3.098589 | 4.966492  | -1.036249 |
| C       | 3.459776  | -0.995728 | -0.156949 | -3.436771 | -1.000001 | 0.138478  | -3.440151 | -0.999070 | 0.147034  |
| C       | 4.068190  | -1.553068 | 0.972225  | -4.040334 | -1.520164 | -1.010970 | -4.057486 | -1.530838 | -0.989022 |
| C       | 3.981605  | -1.239808 | -1.430504 | -3.961233 | -1.284144 | 1.402802  | -3.943129 | -1.270997 | 1.422031  |
| C       | 5.202248  | -2.353101 | 0.823843  | -5.169241 | -2.331723 | -0.890638 | -5.186209 | -2.338593 | -0.843838 |
| H       | 3.651720  | -1.356880 | 1.955805  | -3.623793 | -1.287468 | -1.986424 | -3.653450 | -1.310143 | -1.972358 |
| C       | 5.116059  | -2.040737 | -1.572716 | -5.091051 | -2.096531 | 1.515108  | -5.072993 | -2.079246 | 1.558087  |
| C       | 5.727482  | -2.597638 | -0.447258 | -5.695834 | -2.620715 | 0.370723  | -5.695292 | -2.613251 | 0.427628  |
| H       | 5.673998  | -2.785179 | 1.702387  | -5.635555 | -2.738565 | -1.783945 | -5.665988 | -2.753234 | -1.726251 |
| H       | 5.520601  | -2.228783 | -2.563682 | -5.496744 | -2.318591 | 2.498482  | -5.464740 | -2.290692 | 2.549312  |
| H       | 6.610575  | -3.220947 | -0.560251 | -6.575059 | -3.252961 | 0.461125  | -6.574503 | -3.242405 | 0.536983  |
| C       | -2.684877 | 1.352938  | -0.199479 | 2.689703  | 1.368266  | 0.213750  | 2.691994  | 1.368261  | 0.213089  |
| C       | -3.919991 | 1.922617  | -0.558702 | 3.924769  | 1.904463  | 0.578732  | 3.923476  | 1.918778  | 0.584370  |
| C       | -1.505363 | 2.166227  | -0.130181 | 1.505707  | 2.190448  | 0.092704  | 1.508005  | 2.184389  | 0.103287  |
| C       | -4.030180 | 3.286199  | -0.799097 | 4.085746  | 3.285673  | 0.753096  | 4.063632  | 3.293821  | 0.777985  |
| C       | -1.676847 | 3.540411  | -0.408162 | 1.736770  | 3.585150  | 0.284363  | 1.715367  | 3.573064  | 0.321809  |
| C       | -2.905565 | 4.110035  | -0.716924 | 2.980160  | 4.123927  | 0.587407  | 2.951005  | 4.126123  | 0.630512  |
| H       | -4.996148 | 3.697659  | -1.081510 | 5.057638  | 3.684004  | 1.029937  | 5.030599  | 3.698960  | 1.063759  |
| H       | -0.801471 | 4.179104  | -0.420865 | 0.889802  | 4.259166  | 0.238237  | 0.857616  | 4.234475  | 0.289151  |
| H       | -2.983301 | 5.174150  | -0.923445 | 3.084131  | 5.198408  | 0.724193  | 3.043406  | 5.198420  | 0.787531  |
| C       | -3.563656 | -1.043777 | 0.151511  | 3.537282  | -1.054751 | -0.130643 | 3.548194  | -1.043165 | -0.132633 |
| C       | -4.937392 | -0.965075 | 0.406109  | 4.898968  | -0.984318 | -0.408051 | 4.916671  | -0.976859 | -0.391669 |
| C       | -2.917408 | -2.314325 | 0.094873  | 2.890620  | -2.330699 | -0.066556 | 2.892776  | -2.319517 | -0.081699 |
| C       | -5.662149 | -2.152054 | 0.525021  | 5.619290  | -2.183890 | -0.537425 | 5.631307  | -2.174153 | -0.518248 |
| C       | -3.667743 | -3.489689 | 0.211504  | 3.632455  | -3.513490 | -0.192111 | 3.637504  | -3.505962 | -0.204241 |
| C       | -5.042622 | -3.404257 | 0.411394  | 5.006466  | -3.435312 | -0.413568 | 5.008828  | -3.428911 | -0.407214 |

|              |           |                      |           |           |                      |           |           |                      |           |
|--------------|-----------|----------------------|-----------|-----------|----------------------|-----------|-----------|----------------------|-----------|
| H            | -6.729306 | -2.094878            | 0.722588  | 6.683717  | -2.126391            | -0.748182 | 6.698048  | -2.122051            | -0.719019 |
| H            | -3.176173 | -4.457859            | 0.163046  | 3.135147  | -4.477670            | -0.133032 | 3.136938  | -4.469143            | -0.155596 |
| H            | -5.634915 | -4.310661            | 0.503974  | 5.596058  | -4.341691            | -0.512524 | 5.598974  | -4.335484            | -0.504693 |
| H            | 4.602049  | 1.077101             | 0.229930  | -4.594165 | 1.053421             | -0.156723 | -4.597033 | 1.046401             | -0.181643 |
| H            | 3.497864  | -0.802025            | -2.298748 | -3.484001 | -0.869093            | 2.285543  | -3.450940 | -0.850117            | 2.293580  |
| H            | -4.788123 | 1.298902             | -0.712132 | 4.767570  | 1.257990             | 0.779651  | 4.774824  | 1.280936             | 0.775844  |
| H            | -5.445159 | -0.021765            | 0.555384  | 5.409068  | -0.043640            | -0.561974 | 5.432877  | -0.037370            | -0.534158 |
| <b>2CzBN</b> |           | <b>S<sub>0</sub></b> |           |           | <b>S<sub>1</sub></b> |           |           | <b>T<sub>1</sub></b> |           |
| C            | -1.771064 | -2.042482            | -0.019929 | -1.753508 | -2.052667            | -0.028377 | -1.758170 | -2.046317            | -0.041285 |
| C            | -0.700799 | -2.940850            | -0.056201 | -0.681663 | -2.967992            | -0.096374 | -0.680053 | -2.971773            | -0.125743 |
| C            | 0.614306  | -2.476381            | -0.011629 | 0.612829  | -2.480234            | -0.064283 | 0.612298  | -2.483727            | -0.096830 |
| C            | 0.892247  | -1.094852            | 0.065813  | 0.882835  | -1.072806            | 0.050116  | 0.884112  | -1.084876            | 0.029884  |
| C            | -0.168822 | -0.150601            | 0.071751  | -0.165572 | -0.126400            | 0.054772  | -0.170763 | -0.121681            | 0.038164  |
| C            | -1.464018 | -0.673257            | 0.056261  | -1.446067 | -0.661104            | 0.056674  | -1.452053 | -0.657162            | 0.051104  |
| H            | -0.876515 | -4.009846            | -0.144202 | -0.857774 | -4.031770            | -0.218186 | -0.861816 | -4.032531            | -0.259570 |
| H            | 1.411364  | -3.197975            | -0.110996 | 1.428063  | -3.175234            | -0.205966 | 1.427042  | -3.179922            | -0.240874 |
| B            | -0.010674 | 1.358832             | -0.064509 | -0.005547 | 1.398918             | -0.068941 | -0.014501 | 1.387241             | -0.082905 |
| N            | 2.187582  | -0.563049            | 0.069979  | 2.169514  | -0.559957            | 0.062972  | 2.172251  | -0.561018            | 0.054487  |
| N            | -2.622328 | 0.089350             | 0.045372  | -2.601276 | 0.087294             | 0.069913  | -2.609034 | 0.092808             | 0.074450  |
| C            | 2.417744  | 0.783257             | -0.227335 | 2.421031  | 0.811917             | -0.239148 | 2.422232  | 0.806085             | -0.244673 |
| C            | 3.807936  | 1.000188             | -0.366925 | 3.804552  | 0.997233             | -0.379510 | 3.809244  | 0.996863             | -0.376168 |
| C            | 1.445018  | 1.797039             | -0.364817 | 1.444123  | 1.827882             | -0.357574 | 1.449580  | 1.823366             | -0.369794 |
| C            | 4.263200  | 2.267845             | -0.723557 | 4.295564  | 2.274678             | -0.720663 | 4.295066  | 2.270139             | -0.718343 |
| C            | 1.961079  | 3.055882             | -0.747025 | 1.990532  | 3.091989             | -0.727062 | 1.988828  | 3.079891             | -0.739122 |
| C            | 3.326529  | 3.287549             | -0.927773 | 3.364374  | 3.298514             | -0.901819 | 3.365076  | 3.291584             | -0.910842 |
| H            | 5.324951  | 2.462594             | -0.850796 | 5.359609  | 2.455214             | -0.839081 | 5.359468  | 2.454104             | -0.830612 |
| H            | 1.275224  | 3.878142             | -0.923219 | 1.320918  | 3.928860             | -0.894031 | 1.318617  | 3.915990             | -0.907458 |
| H            | 3.668318  | 4.275876             | -1.223758 | 3.715809  | 4.290307             | -1.179151 | 3.715576  | 4.282661             | -1.190346 |
| C            | 3.440388  | -1.197869            | 0.223208  | 3.407742  | -1.202477            | 0.229204  | 3.409565  | -1.198889            | 0.233205  |
| C            | 3.771357  | -2.482087            | 0.667805  | 3.721592  | -2.480152            | 0.709633  | 3.718572  | -2.478479            | 0.714459  |
| C            | 4.461052  | -0.256814            | -0.072719 | 4.437028  | -0.265769            | -0.081267 | 4.442917  | -0.265812            | -0.070080 |
| C            | 5.121720  | -2.827940            | 0.744319  | 5.065412  | -2.848312            | 0.787844  | 5.060537  | -2.844737            | 0.804609  |
| H            | 3.024753  | -3.194329            | 0.990944  | 2.963928  | -3.166630            | 1.064683  | 2.955927  | -3.164692            | 1.058616  |
| C            | 5.806734  | -0.626201            | 0.005841  | 5.775155  | -0.659722            | 0.000546  | 5.779671  | -0.658026            | 0.021996  |
| C            | 6.133276  | -1.920640            | 0.402415  | 6.083074  | -1.954792            | 0.419837  | 6.083276  | -1.952779            | 0.444371  |
| H            | 5.386510  | -3.823826            | 1.089520  | 5.320636  | -3.836550            | 1.159503  | 5.313001  | -3.832764            | 1.178826  |
| H            | 6.587084  | 0.093810             | -0.225642 | 6.568770  | 0.041170             | -0.243319 | 6.575187  | 0.042513             | -0.216610 |
| H            | 7.175048  | -2.221985            | 0.468486  | 7.122193  | -2.265458            | 0.489462  | 7.121164  | -2.264944            | 0.522241  |
| C            | -2.580387 | 1.480356             | 0.260430  | -2.575667 | 1.494949             | 0.287045  | -2.578300 | 1.495307             | 0.286740  |
| C            | -3.737372 | 2.181684             | 0.645111  | -3.734277 | 2.165000             | 0.693947  | -3.733100 | 2.174888             | 0.696411  |
| C            | -1.326637 | 2.163671             | 0.149617  | -1.323940 | 2.186548             | 0.139352  | -1.325199 | 2.182995             | 0.136369  |
| C            | -3.694203 | 3.554189             | 0.855589  | -3.727064 | 3.549752             | 0.874677  | -3.715265 | 3.556097             | 0.878171  |
| C            | -1.341100 | 3.555930             | 0.386646  | -1.379439 | 3.589749             | 0.333370  | -1.370011 | 3.585919             | 0.334400  |
| C            | -2.494479 | 4.256693             | 0.713271  | -2.545473 | 4.266603             | 0.672501  | -2.529316 | 4.269205             | 0.675967  |
| H            | -4.601462 | 4.071089             | 1.158396  | -4.638000 | 4.052949             | 1.187087  | -4.621603 | 4.064599             | 1.195860  |
| H            | -0.401868 | 4.096319             | 0.348697  | -0.458599 | 4.156506             | 0.252409  | -0.445562 | 4.146814             | 0.253238  |



|                 |           |                      |           |           |                      |           |           |                      |           |
|-----------------|-----------|----------------------|-----------|-----------|----------------------|-----------|-----------|----------------------|-----------|
| H               | -2.458358 | 5.328459             | 0.888717  | -2.528661 | 5.345157             | 0.810550  | -2.507038 | 5.346985             | 0.817949  |
| C               | -3.711154 | -0.799041            | -0.120984 | -3.684547 | -0.804915            | -0.104849 | -3.691435 | -0.799260            | -0.096153 |
| C               | -5.070219 | -0.559927            | -0.351937 | -5.036183 | -0.575877            | -0.343246 | -5.046192 | -0.573041            | -0.320688 |
| C               | -3.208307 | -2.131945            | -0.126882 | -3.175801 | -2.142513            | -0.123274 | -3.174677 | -2.137483            | -0.126158 |
| C               | -5.919983 | -1.655528            | -0.512763 | -5.881982 | -1.683717            | -0.516889 | -5.888586 | -1.681043            | -0.492882 |
| C               | -4.080976 | -3.213706            | -0.284582 | -4.042595 | -3.233259            | -0.292877 | -4.044286 | -3.231648            | -0.293832 |
| C               | -5.440023 | -2.971346            | -0.462614 | -5.402800 | -2.998392            | -0.474788 | -5.402516 | -2.997904            | -0.461708 |
| H               | -6.976398 | -1.474407            | -0.692200 | -6.938108 | -1.503342            | -0.697420 | -6.946876 | -1.504725            | -0.664572 |
| H               | -3.696749 | -4.230307            | -0.282954 | -3.649882 | -4.246190            | -0.296243 | -3.649156 | -4.243547            | -0.305232 |
| H               | -6.128267 | -3.803050            | -0.586061 | -6.087706 | -3.830516            | -0.606553 | -6.087994 | -3.830063            | -0.592144 |
| H               | -4.660974 | 1.656065             | 0.838669  | -4.638770 | 1.617767             | 0.920065  | -4.640105 | 1.632984             | 0.925247  |
| H               | -5.474324 | 0.438217             | -0.450951 | -5.447948 | 0.419523             | -0.434404 | -5.462158 | 0.421604             | -0.401881 |
| <b>DMACCzBN</b> |           | <b>S<sub>0</sub></b> |           |           | <b>S<sub>1</sub></b> |           |           | <b>T<sub>1</sub></b> |           |
| C               | 0.254677  | -2.372669            | -0.192509 | 0.267278  | -2.352857            | -0.283651 | 0.272897  | -2.352789            | -0.303593 |
| C               | -1.042348 | -2.866637            | -0.324615 | -1.019009 | -2.875383            | -0.417108 | -1.007784 | -2.875387            | -0.437287 |
| C               | -2.144295 | -2.000820            | -0.255051 | -2.119203 | -2.004792            | -0.299007 | -2.117468 | -1.998753            | -0.301737 |
| C               | -1.877849 | -0.640879            | -0.041955 | -1.858722 | -0.628475            | -0.048990 | -1.862138 | -0.627506            | -0.042655 |
| C               | -0.600034 | -0.092687            | 0.056636  | -0.597365 | -0.066961            | 0.046559  | -0.600442 | -0.059243            | 0.041023  |
| C               | 0.487343  | -0.988361            | -0.007170 | 0.473654  | -0.966029            | -0.028163 | 0.478623  | -0.969633            | -0.041411 |
| H               | 1.090024  | -3.058597            | -0.273844 | 1.121581  | -3.008332            | -0.414752 | 1.128802  | -3.006786            | -0.435159 |
| H               | -1.184033 | -3.929705            | -0.502505 | -1.154815 | -3.930408            | -0.632903 | -1.147146 | -3.926570            | -0.666489 |
| B               | -0.452825 | 1.410644             | 0.109533  | -0.450155 | 1.452628             | 0.119028  | -0.459179 | 1.445864             | 0.109287  |
| N               | -3.048976 | 0.098218             | 0.004392  | -3.029769 | 0.091416             | 0.038922  | -3.037099 | 0.092083             | 0.045902  |
| N               | 1.776939  | -0.445271            | 0.060634  | 1.765876  | -0.420259            | 0.081594  | 1.766803  | -0.415328            | 0.086531  |
| C               | -3.031223 | 1.451698             | 0.401736  | -3.023127 | 1.459693             | 0.446401  | -3.030515 | 1.457746             | 0.444368  |
| C               | -4.209282 | 2.080835             | 0.842092  | -4.196886 | 2.053761             | 0.916273  | -4.204532 | 2.057381             | 0.915102  |
| C               | -1.784321 | 2.161636             | 0.422960  | -1.773683 | 2.185800             | 0.417523  | -1.784791 | 2.183553             | 0.416329  |
| C               | -4.193096 | 3.408123             | 1.253372  | -4.219621 | 3.402085             | 1.287862  | -4.220768 | 3.401688             | 1.287373  |
| C               | -1.826917 | 3.501079             | 0.867608  | -1.862536 | 3.550951             | 0.807705  | -1.865143 | 3.543939             | 0.812076  |
| C               | -2.999356 | 4.133640             | 1.261200  | -3.044669 | 4.155349             | 1.214778  | -3.044559 | 4.153777             | 1.218958  |
| H               | -5.117691 | 3.866238             | 1.595905  | -5.145673 | 3.843810             | 1.645383  | -5.145070 | 3.845332             | 1.647804  |
| H               | -0.894282 | 4.050274             | 0.940764  | -0.950407 | 4.137924             | 0.831925  | -0.949987 | 4.126411             | 0.838079  |
| H               | -2.983008 | 5.166543             | 1.598407  | -3.047579 | 5.203671             | 1.505241  | -3.044868 | 5.200686             | 1.513479  |
| C               | -4.113246 | -0.792391            | -0.270786 | -4.086046 | -0.798076            | -0.252084 | -4.088907 | -0.798890            | -0.246698 |
| C               | -3.577290 | -2.108367            | -0.402757 | -3.544490 | -2.112736            | -0.426956 | -3.536415 | -2.111460            | -0.428405 |
| C               | -5.474015 | -0.561230            | -0.498580 | -5.446338 | -0.574794            | -0.466937 | -5.451597 | -0.582243            | -0.457458 |
| C               | -4.423627 | -3.185677            | -0.686311 | -4.385071 | -3.191900            | -0.732249 | -4.376437 | -3.195341            | -0.736632 |
| C               | -6.295697 | -1.652472            | -0.786128 | -6.262343 | -1.669367            | -0.779023 | -6.261247 | -1.678408            | -0.771769 |
| C               | -5.785081 | -2.955390            | -0.863424 | -5.749526 | -2.968636            | -0.893693 | -5.738797 | -2.977068            | -0.893078 |
| H               | -4.016601 | -4.188896            | -0.781737 | -3.968967 | -4.188169            | -0.855729 | -3.956070 | -4.189231            | -0.864613 |
| H               | -7.353243 | -1.477042            | -0.964710 | -7.322311 | -1.494974            | -0.943874 | -7.322485 | -1.510542            | -0.935026 |
| H               | -6.451435 | -3.784778            | -1.084533 | -6.413515 | -3.794939            | -1.130277 | -6.400237 | -3.805070            | -1.131847 |
| C               | 2.018690  | 0.907026             | -0.273613 | 2.032031  | 0.937855             | -0.313035 | 2.029850  | 0.940399             | -0.302896 |
| C               | 3.335159  | 1.232978             | -0.688245 | 3.342136  | 1.228188             | -0.726768 | 3.343326  | 1.234537             | -0.714929 |
| C               | 0.984171  | 1.889153             | -0.216619 | 0.992321  | 1.919392             | -0.234242 | 0.987168  | 1.918705             | -0.236825 |
| C               | 3.620468  | 2.567740             | -0.968448 | 3.653704  | 2.565511             | -1.041019 | 3.646634  | 2.567424             | -1.039523 |

|                 |           |                      |           |           |                      |           |           |                      |           |
|-----------------|-----------|----------------------|-----------|-----------|----------------------|-----------|-----------|----------------------|-----------|
| C               | 1.337367  | 3.210560             | -0.565933 | 1.372660  | 3.230289             | -0.588835 | 1.361117  | 3.226322             | -0.600608 |
| C               | 2.633241  | 3.557848             | -0.909105 | 2.675945  | 3.552198             | -0.967778 | 2.663413  | 3.550604             | -0.978748 |
| H               | 4.619094  | 2.851539             | -1.280633 | 4.656973  | 2.836688             | -1.345370 | 4.648462  | 2.841907             | -1.345482 |
| H               | 0.565677  | 3.972653             | -0.587266 | 0.624501  | 4.015295             | -0.578362 | 0.608789  | 4.007479             | -0.601788 |
| H               | 2.882474  | 4.584938             | -1.162917 | 2.930491  | 4.580247             | -1.215902 | 2.913899  | 4.576814             | -1.237919 |
| C               | 2.855658  | -1.159105            | 0.657984  | 2.802538  | -1.134585            | 0.687191  | 2.807164  | -1.135008            | 0.688975  |
| C               | 4.166225  | -0.890807            | 0.223055  | 4.136643  | -0.873122            | 0.284612  | 4.139230  | -0.874787            | 0.287111  |
| C               | 2.628016  | -2.028867            | 1.734815  | 2.532010  | -2.045425            | 1.733075  | 2.531668  | -2.047902            | 1.728892  |
| C               | 5.222609  | -1.541757            | 0.871588  | 5.158507  | -1.558899            | 0.943730  | 5.159580  | -1.570611            | 0.938980  |
| C               | 3.694517  | -2.677698            | 2.350052  | 3.571728  | -2.717191            | 2.358829  | 3.569499  | -2.725301            | 2.352629  |
| H               | 1.618939  | -2.184252            | 2.098910  | 1.511781  | -2.178598            | 2.073833  | 1.509737  | -2.181988            | 2.063419  |
| C               | 4.997916  | -2.438524            | 1.915866  | 4.890745  | -2.476702            | 1.963875  | 4.888462  | -2.490809            | 1.955383  |
| H               | 6.243670  | -1.351980            | 0.560798  | 6.191033  | -1.388091            | 0.662192  | 6.192475  | -1.403062            | 0.657272  |
| H               | 3.503317  | -3.351242            | 3.181318  | 3.355578  | -3.403849            | 3.172520  | 3.351045  | -3.414658            | 3.163267  |
| H               | 5.838283  | -2.935539            | 2.393019  | 5.712676  | -2.990008            | 2.455228  | 5.708607  | -3.010896            | 2.442471  |
| C               | 4.338177  | 0.096028             | -0.930648 | 4.352457  | 0.085174             | -0.883737 | 4.359516  | 0.096275             | -0.869815 |
| C               | 5.784435  | 0.601109             | -1.053914 | 5.804895  | 0.585770             | -0.956510 | 5.810155  | 0.604484             | -0.926138 |
| H               | 5.887415  | 1.279597             | -1.904665 | 5.942883  | 1.243259             | -1.818039 | 5.953901  | 1.268185             | -1.781799 |
| H               | 6.117201  | 1.124112             | -0.151849 | 6.097302  | 1.131445             | -0.054129 | 6.091644  | 1.144632             | -0.017044 |
| H               | 6.467542  | -0.231583            | -1.241381 | 6.495532  | -0.250158            | -1.095406 | 6.505627  | -0.227209            | -1.064746 |
| C               | 3.970269  | -0.614471            | -2.265790 | 4.047123  | -0.670703            | -2.213194 | 4.066284  | -0.648107            | -2.208377 |
| H               | 4.054903  | 0.088344             | -3.101486 | 4.169506  | 0.008538             | -3.062983 | 4.192071  | 0.038753             | -3.051430 |
| H               | 4.653712  | -1.451379            | -2.446321 | 4.736972  | -1.512530            | -2.338207 | 4.760953  | -1.485457            | -2.335063 |
| H               | 2.950251  | -1.005176            | -2.254324 | 3.025737  | -1.058086            | -2.235973 | 3.047031  | -1.040380            | -2.242039 |
| H               | -5.131849 | 1.525009             | 0.923163  | -5.097484 | 1.468542             | 1.039998  | -5.106287 | 1.474340             | 1.040521  |
| H               | -5.899531 | 0.433188             | -0.501135 | -5.880204 | 0.415168             | -0.435761 | -5.891215 | 0.405181             | -0.421044 |
| <b>TMCzCzBN</b> |           | <b>S<sub>0</sub></b> |           |           | <b>S<sub>1</sub></b> |           |           | <b>T<sub>1</sub></b> |           |
| C               | -2.170537 | -2.133342            | -0.092388 | -2.152424 | -2.141259            | -0.107109 | -2.154919 | -2.135512            | -0.116997 |
| C               | -1.097998 | -3.027828            | -0.161327 | -1.080068 | -3.050518            | -0.214141 | -1.076030 | -3.051964            | -0.238140 |
| C               | 0.215410  | -2.563407            | -0.090881 | 0.215928  | -2.562625            | -0.157181 | 0.217391  | -2.562846            | -0.183374 |
| C               | 0.490227  | -1.185099            | 0.044947  | 0.481098  | -1.165782            | 0.019626  | 0.483333  | -1.173210            | 0.002667  |
| C               | -0.573114 | -0.243381            | 0.087939  | -0.569058 | -0.219732            | 0.065808  | -0.573245 | -0.214264            | 0.053292  |
| C               | -1.866941 | -0.768219            | 0.044267  | -1.848460 | -0.756088            | 0.042248  | -1.853503 | -0.753408            | 0.038684  |
| H               | -1.271506 | -4.092523            | -0.294647 | -1.254104 | -4.108343            | -0.382413 | -1.253992 | -4.106941            | -0.416536 |
| B               | -0.417476 | 1.271584             | 0.025282  | -0.412746 | 1.309950             | 0.013765  | -0.421452 | 1.300654             | 0.002322  |
| N               | 1.782527  | -0.651912            | 0.076757  | 1.768962  | -0.648011            | 0.060013  | 1.772149  | -0.645381            | 0.050495  |
| N               | -3.027504 | -0.008423            | 0.062446  | -3.007036 | -0.010057            | 0.088228  | -3.014061 | -0.006908            | 0.092229  |
| C               | 2.008349  | 0.708277             | -0.150450 | 2.015846  | 0.737510             | -0.173493 | 2.016361  | 0.732974             | -0.178120 |
| C               | 3.397013  | 0.940295             | -0.272826 | 3.396321  | 0.939175             | -0.294386 | 3.400548  | 0.940467             | -0.292600 |
| C               | 1.039022  | 1.726804             | -0.242461 | 1.040885  | 1.757753             | -0.249061 | 1.043405  | 1.755209             | -0.258215 |
| C               | 3.846854  | 2.224748             | -0.560533 | 3.882059  | 2.233286             | -0.569904 | 3.880388  | 2.230912             | -0.568833 |
| C               | 1.556823  | 3.004503             | -0.555922 | 1.585282  | 3.034780             | -0.552046 | 1.580768  | 3.026198             | -0.560582 |
| C               | 2.921786  | 3.272348             | -0.722426 | 2.964498  | 3.279463             | -0.712034 | 2.961563  | 3.275671             | -0.719224 |
| H               | 4.910986  | 2.421809             | -0.670966 | 4.947997  | 2.416499             | -0.671143 | 4.946100  | 2.418091             | -0.666525 |
| H               | 0.863480  | 3.828648             | -0.692127 | 0.908217  | 3.873422             | -0.680920 | 0.902987  | 3.864237             | -0.689289 |
| C               | 3.039635  | -1.286930            | 0.197241  | 3.005801  | -1.288748            | 0.200331  | 3.010821  | -1.284673            | 0.199119  |

|   |           |           |           |           |           |           |           |           |           |
|---|-----------|-----------|-----------|-----------|-----------|-----------|-----------|-----------|-----------|
| C | 3.386285  | -2.587931 | 0.574102  | 3.333119  | -2.586801 | 0.617164  | 3.334638  | -2.583277 | 0.615319  |
| C | 4.055624  | -0.328746 | -0.043285 | 4.034150  | -0.335101 | -0.054304 | 4.040797  | -0.333907 | -0.049302 |
| C | 4.738526  | -2.922568 | 0.636772  | 4.676547  | -2.945077 | 0.684861  | 4.677578  | -2.939744 | 0.692354  |
| H | 2.649353  | -3.326212 | 0.859399  | 2.581674  | -3.298440 | 0.934064  | 2.580207  | -3.295634 | 0.922742  |
| C | 5.403234  | -0.692627 | 0.022587  | 5.371782  | -0.724929 | 0.016512  | 5.378190  | -0.721218 | 0.029272  |
| C | 5.764271  | -2.002345 | 0.348615  | 5.711586  | -2.038777 | 0.369475  | 5.715661  | -2.034462 | 0.383974  |
| H | 5.004466  | -3.934705 | 0.932897  | 4.931532  | -3.949751 | 1.011904  | 4.930642  | -3.944681 | 1.020237  |
| H | 6.173631  | 0.051016  | -0.166357 | 6.157831  | -0.002341 | -0.187233 | 6.164819  | 0.002123  | -0.169587 |
| C | -2.990218 | 1.371271  | 0.342358  | -2.982509 | 1.385266  | 0.370270  | -2.986366 | 1.383969  | 0.370968  |
| C | -4.151146 | 2.050889  | 0.753362  | -4.141574 | 2.036457  | 0.805386  | -4.142977 | 2.041545  | 0.809902  |
| C | -1.737684 | 2.061863  | 0.270811  | -1.730718 | 2.084411  | 0.256358  | -1.734600 | 2.081191  | 0.255901  |
| C | -4.112972 | 3.411919  | 1.029316  | -4.135707 | 3.411644  | 1.049123  | -4.129149 | 3.413110  | 1.056468  |
| C | -1.757359 | 3.441075  | 0.574044  | -1.787847 | 3.478398  | 0.514208  | -1.783388 | 3.473420  | 0.519744  |
| C | -2.914254 | 4.122966  | 0.927541  | -2.954189 | 4.138209  | 0.882096  | -2.944790 | 4.137689  | 0.890723  |
| H | -5.023297 | 3.911661  | 1.351190  | -5.047737 | 3.899418  | 1.382362  | -5.037708 | 3.903801  | 1.395314  |
| H | -0.819281 | 3.984685  | 0.566887  | -0.867018 | 4.048456  | 0.461016  | -0.859963 | 4.039408  | 0.467182  |
| H | -2.881725 | 5.185249  | 1.154131  | -2.938634 | 5.209387  | 1.069517  | -2.925219 | 5.207722  | 1.083201  |
| C | -4.113274 | -0.890977 | -0.147301 | -4.086961 | -0.894609 | -0.126664 | -4.092747 | -0.892127 | -0.119641 |
| C | -5.472045 | -0.645339 | -0.373513 | -5.441522 | -0.658273 | -0.350167 | -5.449984 | -0.659273 | -0.332886 |
| C | -3.606935 | -2.221301 | -0.209225 | -3.575654 | -2.229119 | -0.207289 | -3.573503 | -2.225963 | -0.209617 |
| C | -6.318516 | -1.734781 | -0.585565 | -6.283979 | -1.757373 | -0.573238 | -6.288977 | -1.758823 | -0.555286 |
| C | -4.476475 | -3.297090 | -0.417551 | -4.440747 | -3.312377 | -0.425283 | -4.440223 | -3.312377 | -0.426823 |
| C | -5.835400 | -3.050415 | -0.590679 | -5.801089 | -3.072429 | -0.593180 | -5.799114 | -3.074679 | -0.584029 |
| H | -7.374622 | -1.548425 | -0.761529 | -7.341065 | -1.572047 | -0.743521 | -7.347803 | -1.577872 | -0.719278 |
| H | -4.089724 | -4.311920 | -0.458624 | -4.045845 | -4.323288 | -0.476288 | -4.042937 | -4.321980 | -0.484324 |
| H | -5.074331 | 1.514329  | 0.916283  | -5.046288 | 1.479139  | 1.004227  | -5.049221 | 1.487464  | 1.010671  |
| H | -5.878270 | 0.355244  | -0.430702 | -5.855475 | 0.339501  | -0.393223 | -5.867842 | 0.337311  | -0.368423 |
| H | 1.014971  | -3.278425 | -0.215082 | 1.032042  | -3.250952 | -0.325428 | 1.033649  | -3.251495 | -0.353068 |
| H | -6.521019 | -3.877589 | -0.753193 | -6.484793 | -3.898982 | -0.762067 | -6.482415 | -3.901968 | -0.752351 |
| C | 3.406465  | 4.660848  | -1.067192 | 3.442329  | 4.678479  | -1.020579 | 3.435360  | 4.673871  | -1.031922 |
| H | 2.579064  | 5.374858  | -1.110973 | 3.191349  | 5.373283  | -0.209043 | 3.175575  | 5.370833  | -0.225150 |
| H | 4.126437  | 5.029741  | -0.326619 | 4.526093  | 4.713409  | -1.165846 | 4.519581  | 4.713006  | -1.171002 |
| H | 3.911530  | 4.678203  | -2.040993 | 2.968850  | 5.068922  | -1.929823 | 2.964391  | 5.056966  | -1.945451 |
| C | 7.211699  | -2.427054 | 0.398690  | 7.150891  | -2.479874 | 0.427039  | 7.154625  | -2.476891 | 0.450359  |
| H | 7.883176  | -1.563364 | 0.409992  | 7.836100  | -1.628198 | 0.392189  | 7.840489  | -1.625545 | 0.419912  |
| H | 7.423178  | -3.029672 | 1.289108  | 7.359719  | -3.047826 | 1.340925  | 7.357292  | -3.044349 | 1.365759  |
| H | 7.477585  | -3.038740 | -0.473301 | 7.396106  | -3.136585 | -0.418447 | 7.404559  | -3.133375 | -0.393631 |

**PXZDMACBN**

|   | $S_0$     |           |           | $S_1$     |           |           | $T_1$     |           |           |
|---|-----------|-----------|-----------|-----------|-----------|-----------|-----------|-----------|-----------|
| C | -1.499035 | -1.925817 | 0.048764  | -1.464818 | -1.942336 | -0.013025 | -1.459476 | -1.936043 | 0.011710  |
| C | -0.398209 | -2.759718 | -0.176157 | -0.365596 | -2.767915 | -0.256448 | -0.360653 | -2.765411 | -0.253595 |
| C | 0.907842  | -2.284232 | -0.268743 | 0.935354  | -2.254825 | -0.317319 | 0.935995  | -2.250711 | -0.321346 |
| C | 1.158578  | -0.913451 | -0.115268 | 1.151373  | -0.889172 | -0.085178 | 1.150689  | -0.887087 | -0.082434 |
| C | 0.071684  | -0.017781 | 0.050461  | 0.072778  | 0.000066  | 0.066455  | 0.073665  | 0.008647  | 0.079351  |
| C | -1.241036 | -0.544620 | 0.110507  | -1.221835 | -0.544728 | 0.093501  | -1.222932 | -0.544326 | 0.114807  |
| H | -0.548246 | -3.828840 | -0.280394 | -0.499928 | -3.833686 | -0.395608 | -0.498760 | -3.828658 | -0.404988 |
| H | 1.712086  | -2.981156 | -0.470860 | 1.757562  | -2.921936 | -0.549485 | 1.757756  | -2.914500 | -0.564903 |

|   |           |           |           |           |           |           |           |           |           |
|---|-----------|-----------|-----------|-----------|-----------|-----------|-----------|-----------|-----------|
| B | 0.292010  | 1.484223  | 0.125629  | 0.282282  | 1.524155  | 0.117960  | 0.277702  | 1.523896  | 0.117240  |
| N | 2.457515  | -0.385930 | -0.167852 | 2.465999  | -0.344076 | -0.092624 | 2.468251  | -0.340000 | -0.094919 |
| N | -2.330111 | 0.336251  | 0.201526  | -2.316597 | 0.320211  | 0.213225  | -2.322755 | 0.320682  | 0.221202  |
| C | 2.678110  | 0.964941  | -0.498286 | 2.690007  | 0.994952  | -0.517225 | 2.687894  | 0.997525  | -0.509133 |
| C | 3.945960  | 1.304126  | -1.008858 | 3.953666  | 1.312180  | -1.023803 | 3.956413  | 1.322453  | -1.007207 |
| C | 1.678965  | 1.959544  | -0.365147 | 1.670939  | 1.980280  | -0.413168 | 1.657694  | 1.981989  | -0.403943 |
| C | 4.238020  | 2.601124  | -1.397982 | 4.259500  | 2.594683  | -1.491653 | 4.262443  | 2.607028  | -1.470680 |
| C | 1.999828  | 3.269070  | -0.793217 | 2.007962  | 3.260511  | -0.891542 | 2.004210  | 3.267957  | -0.870482 |
| C | 3.250170  | 3.590217  | -1.300450 | 3.267817  | 3.566000  | -1.424585 | 3.264666  | 3.573769  | -1.396665 |
| H | 5.223195  | 2.815981  | -1.800697 | 5.255040  | 2.798261  | -1.871199 | 5.258494  | 2.816147  | -1.844439 |
| H | 1.231941  | 4.034830  | -0.751341 | 1.255280  | 4.041756  | -0.858321 | 1.253149  | 4.050588  | -0.837479 |
| H | 3.470090  | 4.601521  | -1.631370 | 3.477386  | 4.571905  | -1.778772 | 3.473271  | 4.582642  | -1.743916 |
| C | 3.613095  | -1.123673 | 0.209298  | 3.586844  | -1.079401 | 0.282306  | 3.589071  | -1.081871 | 0.272352  |
| C | 3.611682  | -2.155397 | 1.156690  | 3.554968  | -2.161028 | 1.188221  | 3.553485  | -2.170881 | 1.168862  |
| C | 4.844274  | -0.736451 | -0.343123 | 4.846812  | -0.701311 | -0.249696 | 4.846972  | -0.699640 | -0.255270 |
| C | 4.789161  | -2.839537 | 1.462495  | 4.710727  | -2.872931 | 1.477500  | 4.707829  | -2.885119 | 1.452852  |
| H | 2.685984  | -2.429695 | 1.648282  | 2.619362  | -2.421604 | 1.667517  | 2.617531  | -2.432034 | 1.646589  |
| C | 6.022603  | -1.410121 | -0.037418 | 6.002199  | -1.427272 | 0.032961  | 6.001744  | -1.432189 | 0.016896  |
| C | 5.992775  | -2.482745 | 0.854150  | 5.934088  | -2.523483 | 0.887130  | 5.931149  | -2.533809 | 0.861664  |
| H | 4.758705  | -3.649274 | 2.186020  | 4.662478  | -3.699268 | 2.180552  | 4.659970  | -3.714900 | 2.151589  |
| H | 6.946392  | -1.076807 | -0.500105 | 6.937170  | -1.107086 | -0.415303 | 6.937165  | -1.109296 | -0.428206 |
| H | 6.909097  | -3.018186 | 1.085433  | 6.833714  | -3.087771 | 1.113351  | 6.829622  | -3.101864 | 1.082703  |
| C | -2.174802 | 1.640864  | 0.716797  | -2.162545 | 1.623679  | 0.779563  | -2.175812 | 1.630342  | 0.767523  |
| C | -3.276625 | 2.277866  | 1.322733  | -3.242544 | 2.192681  | 1.462351  | -3.263376 | 2.208987  | 1.435345  |
| C | -0.907307 | 2.285135  | 0.681491  | -0.908959 | 2.308820  | 0.660961  | -0.924686 | 2.312913  | 0.657424  |
| C | -3.139107 | 3.544462  | 1.873538  | -3.154802 | 3.489332  | 1.978616  | -3.174459 | 3.504349  | 1.946793  |
| C | -0.813213 | 3.567717  | 1.266677  | -0.873560 | 3.628258  | 1.195094  | -0.884193 | 3.626153  | 1.194679  |
| C | -1.902338 | 4.202386  | 1.847468  | -1.963620 | 4.211830  | 1.826021  | -1.978121 | 4.219657  | 1.812134  |
| H | -3.997631 | 4.011600  | 2.350076  | -4.004629 | 3.920680  | 2.500568  | -4.028834 | 3.941718  | 2.456685  |
| H | 0.155033  | 4.059214  | 1.285413  | 0.058607  | 4.183684  | 1.140067  | 0.052695  | 4.174618  | 1.151176  |
| H | -1.794747 | 5.187426  | 2.293833  | -1.885373 | 5.221933  | 2.222889  | -1.898156 | 5.228810  | 2.210592  |
| C | -3.530652 | -0.085346 | -0.438773 | -3.520407 | -0.084047 | -0.412792 | -3.518047 | -0.092763 | -0.417293 |
| C | -4.323247 | 0.828792  | -1.149851 | -4.354704 | 0.852971  | -1.048076 | -4.345394 | 0.833746  | -1.074744 |
| C | -3.849171 | -1.458537 | -0.447778 | -3.825916 | -1.461996 | -0.482944 | -3.816858 | -1.471628 | -0.476913 |
| C | -5.462154 | 0.399082  | -1.824105 | -5.502027 | 0.439158  | -1.714839 | -5.482464 | 0.408453  | -1.752919 |
| C | -4.990885 | -1.865044 | -1.149364 | -4.982343 | -1.849142 | -1.169686 | -4.960064 | -1.871712 | -1.179113 |
| C | -5.803816 | -0.952759 | -1.821232 | -5.825749 | -0.917280 | -1.774558 | -5.798628 | -0.949625 | -1.804673 |
| H | -6.066016 | 1.121307  | -2.367316 | -6.131250 | 1.179142  | -2.202898 | -6.108195 | 1.140819  | -2.256743 |
| H | -5.258733 | -2.915273 | -1.174507 | -5.239093 | -2.900310 | -1.238148 | -5.210378 | -2.924840 | -1.241287 |
| H | -6.688794 | -1.300175 | -2.347573 | -6.719236 | -1.251289 | -2.295057 | -6.683267 | -1.292553 | -2.334517 |
| C | -2.925260 | -2.417130 | 0.308869  | -2.886847 | -2.447858 | 0.216802  | -2.881085 | -2.444829 | 0.245451  |
| C | -3.224656 | -2.313876 | 1.831973  | -3.171121 | -2.413516 | 1.749831  | -3.173496 | -2.388944 | 1.775086  |
| H | -4.255445 | -2.624055 | 2.036293  | -4.198216 | -2.740950 | 1.943126  | -4.199937 | -2.718500 | 1.968991  |
| H | -2.548695 | -2.967196 | 2.394367  | -2.486368 | -3.086104 | 2.277533  | -2.488291 | -3.050365 | 2.316325  |
| H | -3.096678 | -1.294440 | 2.203779  | -3.049008 | -1.409661 | 2.162795  | -3.057947 | -1.378696 | 2.173941  |
| C | -3.125422 | -3.881371 | -0.111990 | -3.080350 | -3.894553 | -0.264473 | -3.068875 | -3.898849 | -0.214917 |

|                  |           |                      |           |           |                      |           |           |                      |           |
|------------------|-----------|----------------------|-----------|-----------|----------------------|-----------|-----------|----------------------|-----------|
| H                | -4.142606 | -4.214251            | 0.111376  | -4.094601 | -4.241044            | -0.050353 | -4.083028 | -4.244837            | 0.001205  |
| H                | -2.939799 | -4.032122            | -1.180099 | -2.900222 | -3.997560            | -1.339080 | -2.885397 | -4.018350            | -1.287270 |
| H                | -2.455727 | -4.537703            | 0.450469  | -2.405042 | -4.570866            | 0.266487  | -2.392556 | -4.564513            | 0.328205  |
| H                | -4.231518 | 1.767553             | 1.383764  | -4.162255 | 1.629002             | 1.583273  | -4.185951 | 1.648931             | 1.550534  |
| H                | -4.038008 | 1.873792             | -1.187284 | -4.089842 | 1.903307             | -1.029027 | -4.084510 | 1.885300             | -1.064484 |
| O                | 4.915422  | 0.339534             | -1.195802 | 4.965934  | 0.378761             | -1.068341 | 4.968346  | 0.393611             | -1.053761 |
| <b>PTZDMACBN</b> |           | <b>S<sub>0</sub></b> |           |           | <b>S<sub>1</sub></b> |           |           | <b>T<sub>1</sub></b> |           |
| C                | 1.631699  | -1.917280            | 0.032641  | -1.595068 | -1.930565            | -0.106054 | -1.585156 | -1.925197            | -0.084082 |
| C                | 0.526867  | -2.745624            | 0.261883  | -0.489958 | -2.746774            | -0.368675 | -0.475656 | -2.743432            | -0.351053 |
| C                | -0.779016 | -2.264254            | 0.336159  | 0.809110  | -2.229587            | -0.401734 | 0.817396  | -2.220575            | -0.385470 |
| C                | -1.021669 | -0.896005            | 0.163696  | 1.015630  | -0.869368            | -0.129380 | 1.021161  | -0.857601            | -0.117330 |
| C                | 0.064234  | -0.010488            | -0.026888 | -0.062681 | 0.006383             | 0.058262  | -0.060958 | 0.021363             | 0.067532  |
| C                | 1.375821  | -0.538316            | -0.070585 | -1.356776 | -0.540372            | 0.059499  | -1.355134 | -0.537215            | 0.071107  |
| H                | 0.673837  | -3.813286            | 0.383578  | -0.622150 | -3.807342            | -0.544747 | -0.606333 | -3.803024            | -0.531334 |
| H                | -1.593605 | -2.953350            | 0.528294  | 1.641553  | -2.884891            | -0.634684 | 1.652419  | -2.871994            | -0.620316 |
| B                | -0.167478 | 1.482532             | -0.178724 | 0.158599  | 1.520508             | 0.183385  | 0.150653  | 1.527172             | 0.183786  |
| N                | -2.330617 | -0.377561            | 0.209160  | 2.335239  | -0.328489            | -0.117832 | 2.338052  | -0.316035            | -0.109628 |
| N                | 2.461817  | 0.341179             | -0.197287 | -2.449785 | 0.321402             | 0.216802  | -2.454660 | 0.321380             | 0.211589  |
| C                | -2.553189 | 0.981802             | 0.524268  | 2.558054  | 1.012699             | -0.552891 | 2.558421  | 1.025883             | -0.526247 |
| C                | -3.792745 | 1.340878             | 1.095138  | 3.784086  | 1.354324             | -1.137645 | 3.791628  | 1.374475             | -1.102435 |
| C                | -1.556064 | 1.969117             | 0.303458  | 1.534582  | 1.991388             | -0.354522 | 1.524889  | 2.002374             | -0.333040 |
| C                | -4.064940 | 2.671071             | 1.407614  | 4.048452  | 2.675315             | -1.550192 | 4.053930  | 2.696993             | -1.504806 |
| C                | -1.857462 | 3.296778             | 0.677684  | 1.842626  | 3.298325             | -0.781564 | 1.838788  | 3.315055             | -0.748606 |
| C                | -3.090026 | 3.653375             | 1.207382  | 3.067498  | 3.640523             | -1.363101 | 3.065958  | 3.658780             | -1.316962 |
| H                | -5.027396 | 2.930277             | 1.839842  | 5.011937  | 2.925121             | -1.982859 | 5.018277  | 2.953272             | -1.931042 |
| H                | -1.089039 | 4.055821             | 0.569833  | 1.088587  | 4.070505             | -0.665586 | 1.081965  | 4.085350             | -0.639865 |
| H                | -3.297777 | 4.683924             | 1.482354  | 3.257590  | 4.666757             | -1.667311 | 3.256716  | 4.686974             | -1.615066 |
| C                | -3.411601 | -1.115859            | -0.361487 | 3.382858  | -1.074283            | 0.422958  | 3.391476  | -1.076389            | 0.414139  |
| C                | -3.230191 | -1.908976            | -1.504955 | 3.161714  | -1.975143            | 1.491421  | 3.172821  | -1.974357            | 1.483083  |
| C                | -4.703786 | -0.997894            | 0.175634  | 4.708815  | -0.932923            | -0.067167 | 4.708080  | -0.942736            | -0.091791 |
| C                | -4.292708 | -2.631950            | -2.042541 | 4.198103  | -2.737104            | 2.004284  | 4.206846  | -2.751840            | 1.979020  |
| H                | -2.249279 | -1.968745            | -1.962787 | 2.168791  | -2.046876            | 1.918773  | 2.185108  | -2.033735            | 1.924204  |
| C                | -5.773683 | -1.705283            | -0.382596 | 5.746802  | -1.712571            | 0.461658  | 5.743444  | -1.740667            | 0.415160  |
| C                | -5.565895 | -2.543778            | -1.475660 | 5.495483  | -2.621037            | 1.481883  | 5.495279  | -2.651674            | 1.433893  |
| H                | -4.124080 | -3.253265            | -2.917886 | 4.002355  | -3.412649            | 2.832055  | 4.015564  | -3.426345            | 2.808514  |
| H                | -6.765874 | -1.591581            | 0.044619  | 6.752262  | -1.590654            | 0.069683  | 6.745036  | -1.627776            | 0.010849  |
| H                | -6.396982 | -3.104312            | -1.894400 | 6.307293  | -3.217095            | 1.887959  | 6.305784  | -3.260594            | 1.823325  |
| C                | 2.301043  | 1.621105             | -0.768996 | -2.291761 | 1.597160             | 0.842702  | -2.309985 | 1.603170             | 0.822520  |
| C                | 3.403052  | 2.237613             | -1.396159 | -3.372744 | 2.137011             | 1.549163  | -3.402381 | 2.146898             | 1.512554  |
| C                | 1.028657  | 2.259757             | -0.772474 | -1.035802 | 2.281877             | 0.766326  | -1.056742 | 2.289009             | 0.757575  |
| C                | 3.261272  | 3.475205             | -2.007908 | -3.279924 | 3.403317             | 2.133187  | -3.315610 | 3.412300             | 2.093583  |
| C                | 0.931196  | 3.511968             | -1.420101 | -0.993921 | 3.566716             | 1.372782  | -1.019693 | 3.570609             | 1.364340  |
| C                | 2.020024  | 4.125207             | -2.023375 | -2.084229 | 4.124640             | 2.028434  | -2.117654 | 4.131652             | 2.005532  |
| H                | 4.120395  | 3.924497             | -2.500254 | -4.130627 | 3.811523             | 2.672216  | -4.172765 | 3.822557             | 2.620870  |
| H                | -0.040094 | 3.995347             | -1.469953 | -0.057326 | 4.117122             | 1.353573  | -0.082224 | 4.119624             | 1.356769  |
| H                | 1.909375  | 5.086454             | -2.518140 | -2.001396 | 5.110879             | 2.480253  | -2.039094 | 5.117674             | 2.458336  |

|                  |           |                      |           |           |                      |           |           |                      |           |
|------------------|-----------|----------------------|-----------|-----------|----------------------|-----------|-----------|----------------------|-----------|
| C                | 3.664538  | -0.055079            | 0.455012  | -3.654020 | -0.054519            | -0.424908 | -3.652833 | -0.068532            | -0.435824 |
| C                | 4.457762  | 0.885818             | 1.129273  | -4.490262 | 0.910390             | -1.014372 | -4.485410 | 0.884835             | -1.046930 |
| C                | 3.982857  | -1.427163            | 0.515534  | -3.956416 | -1.428465            | -0.561110 | -3.947058 | -1.444659            | -0.555078 |
| C                | 5.598105  | 0.482494             | 1.817284  | -5.637158 | 0.527137             | -1.699874 | -5.625836 | 0.487541             | -1.735958 |
| C                | 5.126116  | -1.805906            | 1.230022  | -5.112159 | -1.783656            | -1.266056 | -5.095384 | -1.814913            | -1.264842 |
| C                | 5.939958  | -0.868381            | 1.865113  | -5.957614 | -0.825385            | -1.825140 | -5.939677 | -0.867654            | -1.843717 |
| H                | 6.202738  | 1.224943             | 2.331564  | -6.267985 | 1.288535             | -2.151503 | -6.255680 | 1.239646             | -2.204067 |
| H                | 5.394602  | -2.854218            | 1.295164  | -5.366996 | -2.830640            | -1.385683 | -5.344712 | -2.864462            | -1.372517 |
| H                | 6.825830  | -1.195453            | 2.402843  | -6.850274 | -1.135889            | -2.361370 | -6.826687 | -1.189275            | -2.382783 |
| S                | -4.952104 | 0.078209             | 1.559076  | 5.053410  | 0.157045             | -1.393258 | 5.051830  | 0.178361             | -1.392704 |
| C                | 3.059859  | -2.415845            | -0.203534 | -3.018197 | -2.447127            | 0.092205  | -3.006012 | -2.449009            | 0.115781  |
| C                | 3.362040  | -2.372112            | -1.729084 | -3.309261 | -2.488648            | 1.623776  | -3.302421 | -2.473628            | 1.646404  |
| H                | 4.393453  | -2.689158            | -1.919022 | -4.336750 | -2.826014            | 1.797014  | -4.327338 | -2.818518            | 1.820256  |
| H                | 2.687779  | -3.047668            | -2.266697 | -2.625805 | -3.185616            | 2.120646  | -2.614506 | -3.158018            | 2.154400  |
| H                | 3.234061  | -1.368066            | -2.140807 | -3.189780 | -1.506050            | 2.085963  | -3.193574 | -1.484362            | 2.096743  |
| C                | 3.260704  | -3.862067            | 0.275608  | -3.209229 | -3.868237            | -0.461374 | -3.187075 | -3.878072            | -0.420360 |
| H                | 4.279066  | -4.202077            | 0.069173  | -4.224052 | -4.225618            | -0.268948 | -4.200624 | -4.238431            | -0.226583 |
| H                | 3.071029  | -3.970438            | 1.348108  | -3.024314 | -3.917234            | -1.538970 | -2.998448 | -3.940348            | -1.496598 |
| H                | 2.594365  | -4.541468            | -0.262783 | -2.535888 | -4.570153            | 0.037759  | -2.511257 | -4.569249            | 0.090155  |
| H                | 4.361609  | 1.731646             | -1.427321 | -4.295777 | 1.572957             | 1.637776  | -4.325554 | 1.582113             | 1.593599  |
| H                | 4.171657  | 1.931284             | 1.127608  | -4.226773 | 1.959030             | -0.946285 | -4.225015 | 1.935129             | -0.993381 |
| <b>DPADMACBN</b> |           | <b>S<sub>0</sub></b> |           |           | <b>S<sub>1</sub></b> |           |           | <b>T<sub>1</sub></b> |           |
| C                | 1.247322  | -1.887953            | 0.348376  | 1.223577  | -1.912339            | 0.346190  | 1.225606  | -1.900667            | 0.359332  |
| C                | 0.086297  | -2.668956            | 0.331645  | 0.059174  | -2.688194            | 0.425565  | 0.067756  | -2.683857            | 0.428314  |
| C                | -1.189797 | -2.132818            | 0.189316  | -1.202257 | -2.117002            | 0.313057  | -1.198526 | -2.110080            | 0.297550  |
| C                | -1.352485 | -0.741434            | 0.066155  | -1.351654 | -0.712964            | 0.133885  | -1.350280 | -0.714618            | 0.119347  |
| C                | -0.207631 | 0.095610             | 0.086095  | -0.212353 | 0.110887             | 0.103312  | -0.212770 | 0.123289             | 0.091734  |
| C                | 1.070764  | -0.503071            | 0.193976  | 1.044300  | -0.511036            | 0.184047  | 1.047814  | -0.504817            | 0.179026  |
| H                | 0.163308  | -3.745138            | 0.444395  | 0.121965  | -3.760791            | 0.560248  | 0.130826  | -3.755064            | 0.569272  |
| H                | -2.040317 | -2.801815            | 0.179332  | -2.069711 | -2.762874            | 0.356649  | -2.064729 | -2.758308            | 0.335696  |
| B                | -0.344203 | 1.605862             | 0.026696  | -0.338149 | 1.641008             | -0.024752 | -0.342941 | 1.637801             | -0.017944 |
| N                | -2.621545 | -0.168600            | -0.075758 | -2.615512 | -0.154554            | -0.033079 | -2.619638 | -0.155612            | -0.041977 |
| N                | 2.213659  | 0.309899             | 0.112508  | 2.186777  | 0.294635             | 0.081037  | 2.192851  | 0.301852             | 0.066998  |
| C                | -2.832238 | 1.192219             | -0.349068 | -2.843762 | 1.217431             | -0.336653 | -2.852139 | 1.214828             | -0.325198 |
| C                | -4.142233 | 1.646231             | -0.631218 | -4.155417 | 1.642261             | -0.600484 | -4.167736 | 1.638419             | -0.584974 |
| C                | -1.748233 | 2.120910             | -0.350702 | -1.747579 | 2.143333             | -0.367766 | -1.758794 | 2.145306             | -0.345272 |
| C                | -4.373202 | 2.971624             | -0.965720 | -4.422588 | 2.975979             | -0.934267 | -4.439584 | 2.971704             | -0.901740 |
| C                | -2.036358 | 3.452380             | -0.730552 | -2.072213 | 3.472131             | -0.746753 | -2.089350 | 3.474806             | -0.707363 |
| C                | -3.315669 | 3.887435             | -1.039689 | -3.372181 | 3.889588             | -1.021738 | -3.390757 | 3.889923             | -0.977583 |
| H                | -5.389344 | 3.289188             | -1.188037 | -5.446510 | 3.281172             | -1.132872 | -5.463957 | 3.276533             | -1.097864 |
| H                | -1.213377 | 4.156134             | -0.802847 | -1.264627 | 4.189566             | -0.848228 | -1.286140 | 4.198091             | -0.799994 |
| H                | -3.496523 | 4.918245             | -1.332468 | -3.564423 | 4.922571             | -1.303891 | -3.586697 | 4.925371             | -1.247700 |
| C                | -3.765130 | -1.040304            | 0.013513  | -3.755972 | -1.032511            | 0.026783  | -3.756705 | -1.039903            | 0.014008  |
| C                | -4.255484 | -1.677656            | -1.130951 | -4.210358 | -1.675185            | -1.129650 | -4.207430 | -1.678209            | -1.145781 |
| C                | -4.378768 | -1.251185            | 1.251793  | -4.404659 | -1.240589            | 1.247789  | -4.402663 | -1.257123            | 1.234513  |
| C                | -5.361108 | -2.524203            | -1.033794 | -5.310561 | -2.531273            | -1.059874 | -5.305362 | -2.537433            | -1.080379 |

|   |           |           |           |           |           |           |           |           |           |
|---|-----------|-----------|-----------|-----------|-----------|-----------|-----------|-----------|-----------|
| H | -3.769652 | -1.506333 | -2.087021 | -3.700768 | -1.500725 | -2.072653 | -3.698053 | -1.497570 | -2.087671 |
| C | -5.484359 | -2.098467 | 1.343399  | -5.505183 | -2.097257 | 1.311069  | -5.500754 | -2.117051 | 1.292963  |
| C | -5.976763 | -2.735575 | 0.202153  | -5.959106 | -2.743472 | 0.159068  | -5.953166 | -2.757931 | 0.137434  |
| H | -5.740400 | -3.017897 | -1.924639 | -5.660184 | -3.031562 | -1.959147 | -5.653835 | -3.033436 | -1.982392 |
| H | -5.959852 | -2.259917 | 2.307255  | -6.006381 | -2.258869 | 2.261774  | -6.001346 | -2.285161 | 2.242800  |
| H | -6.837652 | -3.394900 | 0.275575  | -6.815837 | -3.410196 | 0.210732  | -6.808230 | -3.426994 | 0.185491  |
| C | 2.166781  | 1.673784  | 0.467618  | 2.156257  | 1.666007  | 0.498553  | 2.163444  | 1.669437  | 0.471697  |
| C | 3.342360  | 2.302321  | 0.927423  | 3.315255  | 2.214513  | 1.055954  | 3.332611  | 2.232145  | 1.003074  |
| C | 0.934905  | 2.384748  | 0.438608  | 0.940013  | 2.407762  | 0.377634  | 0.939137  | 2.405823  | 0.374106  |
| C | 3.313687  | 3.623495  | 1.350742  | 3.343386  | 3.558954  | 1.446121  | 3.356909  | 3.571241  | 1.395331  |
| C | 0.953204  | 3.718154  | 0.906633  | 1.021614  | 3.763579  | 0.790207  | 1.019189  | 3.759757  | 0.791956  |
| C | 2.112293  | 4.342911  | 1.346590  | 2.188515  | 4.331817  | 1.296852  | 2.189726  | 4.335091  | 1.275783  |
| H | 4.228381  | 4.084311  | 1.716158  | 4.251392  | 3.982150  | 1.866159  | 4.268586  | 4.001591  | 1.799832  |
| H | 0.017696  | 4.266091  | 0.952444  | 0.128258  | 4.376687  | 0.742955  | 0.120024  | 4.365651  | 0.767807  |
| H | 2.084756  | 5.369558  | 1.702382  | 2.192117  | 5.377845  | 1.596394  | 2.190548  | 5.379011  | 1.582574  |
| C | 3.352158  | -0.278267 | -0.505189 | 3.331947  | -0.267137 | -0.511474 | 3.338981  | -0.271699 | -0.520829 |
| C | 4.158179  | 0.466353  | -1.380224 | 4.183157  | 0.521313  | -1.312137 | 4.180059  | 0.499268  | -1.344859 |
| C | 3.590089  | -1.655234 | -0.317822 | 3.571321  | -1.654943 | -0.364295 | 3.577227  | -1.654031 | -0.345527 |
| C | 5.232438  | -0.132794 | -2.030872 | 5.282454  | -0.048518 | -1.938073 | 5.277840  | -0.082691 | -1.964979 |
| C | 4.666313  | -2.235961 | -1.000094 | 4.691643  | -2.195604 | -1.002669 | 4.692582  | -2.209091 | -0.981433 |
| C | 5.493384  | -1.489239 | -1.838716 | 5.546605  | -1.411527 | -1.778745 | 5.542863  | -1.441054 | -1.778195 |
| H | 5.848251  | 0.459187  | -2.703042 | 5.921969  | 0.568547  | -2.563260 | 5.913112  | 0.521254  | -2.607087 |
| H | 4.871295  | -3.293504 | -0.876905 | 4.909174  | -3.252810 | -0.904363 | 4.909636  | -3.264419 | -0.863910 |
| H | 6.326943  | -1.968575 | -2.345141 | 6.403481  | -1.867688 | -2.266651 | 6.397067  | -1.907395 | -2.261265 |
| H | -4.978436 | 0.959319  | -0.606507 | -4.981313 | 0.944302  | -0.551549 | -4.989630 | 0.935129  | -0.546645 |
| H | -3.987492 | -0.751056 | 2.132882  | -4.044294 | -0.731205 | 2.136658  | -4.043295 | -0.752031 | 2.126152  |
| H | 4.269868  | 1.743231  | 0.981215  | 4.199310  | 1.599089  | 1.187221  | 4.223161  | 1.622945  | 1.117267  |
| H | 3.932344  | 1.511094  | -1.561262 | 3.958205  | 1.571301  | -1.454823 | 3.951479  | 1.545359  | -1.510272 |
| C | 2.655426  | -2.423989 | 0.620806  | 2.630168  | -2.468030 | 0.523430  | 2.635151  | -2.448935 | 0.559374  |
| C | 3.043755  | -2.108002 | 2.093574  | 3.047689  | -2.250092 | 2.015444  | 3.042662  | -2.195383 | 2.046222  |
| H | 2.994134  | -1.037482 | 2.306517  | 3.015490  | -1.194087 | 2.293581  | 3.007820  | -1.133410 | 2.300164  |
| H | 2.363005  | -2.621798 | 2.781080  | 2.372786  | -2.799815 | 2.679068  | 2.364177  | -2.729882 | 2.718685  |
| H | 4.064866  | -2.449010 | 2.298126  | 4.067274  | -2.617569 | 2.170502  | 4.061572  | -2.557836 | 2.217668  |
| C | 2.749322  | -3.945304 | 0.425048  | 2.703143  | -3.976897 | 0.229560  | 2.714047  | -3.963461 | 0.300782  |
| H | 2.078126  | -4.463931 | 1.115020  | 2.042545  | -4.533775 | 0.898165  | 2.051673  | -4.505847 | 0.979485  |
| H | 2.493205  | -4.245319 | -0.595985 | 2.424665  | -4.204570 | -0.803785 | 2.440472  | -4.216771 | -0.727905 |
| H | 3.757773  | -4.304656 | 0.647618  | 3.711062  | -4.358201 | 0.409524  | 3.722444  | -4.337505 | 0.493783  |

**CzDMACBN**

|   | <b>S<sub>0</sub></b> |           |           | <b>S<sub>1</sub></b> |           |           | <b>T<sub>1</sub></b> |           |           |
|---|----------------------|-----------|-----------|----------------------|-----------|-----------|----------------------|-----------|-----------|
| C | -1.471883            | -1.907167 | 0.272809  | 1.443121             | -1.932651 | -0.255209 | -1.445384            | -1.928577 | 0.240955  |
| C | -0.406739            | -2.798085 | 0.144751  | 0.362671             | -2.830631 | -0.187641 | -0.370713            | -2.828013 | 0.158015  |
| C | 0.919491             | -2.382344 | 0.024505  | -0.943894            | -2.383179 | -0.088236 | 0.938933             | -2.375379 | 0.047966  |
| C | 1.224775             | -1.018965 | 0.067807  | -1.235982            | -0.994910 | -0.113535 | 1.235614             | -0.996387 | 0.086641  |
| C | 0.171788             | -0.060587 | 0.119923  | -0.183678            | -0.052524 | -0.127853 | 0.185729             | -0.043466 | 0.108502  |
| C | -1.161006            | -0.534005 | 0.194374  | 1.132479             | -0.556693 | -0.182246 | -1.133862            | -0.552453 | 0.166360  |
| H | -0.595779            | -3.865933 | 0.143538  | 0.539706             | -3.898605 | -0.172611 | -0.546293            | -3.895816 | 0.143766  |
| H | 1.681525             | -3.130472 | -0.133813 | -1.726958            | -3.111007 | 0.065191  | 1.719987             | -3.104923 | -0.110423 |

|   |           |           |           |           |           |           |           |           |           |
|---|-----------|-----------|-----------|-----------|-----------|-----------|-----------|-----------|-----------|
| B | 0.427711  | 1.446742  | 0.040695  | -0.429655 | 1.469341  | 0.001550  | 0.432820  | 1.468080  | 0.000753  |
| N | 2.540898  | -0.531752 | 0.003846  | -2.542286 | -0.516107 | -0.020641 | 2.548494  | -0.517822 | 0.010563  |
| N | -2.227032 | 0.378670  | 0.151534  | 2.201920  | 0.361294  | -0.112271 | -2.204141 | 0.363473  | 0.107985  |
| C | 2.807974  | 0.799534  | -0.309609 | -2.808751 | 0.820167  | 0.334519  | 2.820039  | 0.820231  | -0.326234 |
| C | 4.191713  | 0.969393  | -0.536686 | -4.185383 | 0.976961  | 0.572243  | 4.198402  | 0.978419  | -0.553371 |
| C | 1.865952  | 1.842024  | -0.364469 | -1.849480 | 1.857496  | 0.394337  | 1.863599  | 1.860576  | -0.377709 |
| C | 4.661476  | 2.227968  | -0.911105 | -4.671298 | 2.241295  | 0.960515  | 4.688019  | 2.244219  | -0.924223 |
| C | 2.389241  | 3.091814  | -0.761264 | -2.391583 | 3.113923  | 0.803314  | 2.408415  | 3.116041  | -0.772429 |
| C | 3.746750  | 3.280163  | -1.037269 | -3.750397 | 3.287988  | 1.079248  | 3.769486  | 3.293040  | -1.039519 |
| H | 5.717932  | 2.392398  | -1.107270 | -5.727253 | 2.401267  | 1.157620  | 5.745548  | 2.405303  | -1.112214 |
| H | 1.716043  | 3.936997  | -0.869535 | -1.724530 | 3.962644  | 0.920509  | 1.744143  | 3.967546  | -0.884171 |
| H | 4.100962  | 4.261080  | -1.343389 | -4.104708 | 4.269800  | 1.387409  | 4.125971  | 4.277493  | -1.335891 |
| C | 3.775725  | -1.213361 | 0.082047  | -3.776090 | -1.196400 | -0.107968 | 3.778080  | -1.199531 | 0.100015  |
| C | 4.088626  | -2.507213 | 0.513364  | -4.097772 | -2.469967 | -0.588665 | 4.093568  | -2.481875 | 0.565886  |
| C | 4.812595  | -0.311844 | -0.282060 | -4.804783 | -0.294644 | 0.293706  | 4.813467  | -0.298013 | -0.284065 |
| C | 5.427371  | -2.902681 | 0.508369  | -5.436848 | -2.868142 | -0.581551 | 5.430208  | -2.882148 | 0.562795  |
| H | 3.338484  | -3.189912 | 0.887687  | -3.355792 | -3.136678 | -1.007967 | 3.346539  | -3.151768 | 0.970609  |
| C | 6.146012  | -0.731582 | -0.284511 | -6.139218 | -0.718312 | 0.295286  | 6.146395  | -0.725162 | -0.283088 |
| C | 6.448963  | -2.035586 | 0.098368  | -6.448496 | -2.009188 | -0.126954 | 6.448665  | -2.021567 | 0.124707  |
| H | 5.675942  | -3.906273 | 0.843414  | -5.692456 | -3.856995 | -0.952477 | 5.681151  | -3.875766 | 0.924239  |
| H | 6.936340  | -0.041388 | -0.567579 | -6.927249 | -0.037767 | 0.606932  | 6.938104  | -0.043262 | -0.582146 |
| H | 7.480985  | -2.375401 | 0.101458  | -7.482466 | -2.344393 | -0.130385 | 7.481143  | -2.361003 | 0.130484  |
| C | -2.054491 | 1.728495  | 0.519563  | 2.048532  | 1.711442  | -0.556842 | -2.050067 | 1.710312  | 0.542713  |
| C | -3.158330 | 2.456796  | 1.008236  | 3.145102  | 2.355301  | -1.145156 | -3.152801 | 2.362918  | 1.116935  |
| C | -0.769527 | 2.331079  | 0.455748  | 0.781703  | 2.343060  | -0.427753 | -0.775660 | 2.339438  | 0.418556  |
| C | -3.003600 | 3.774863  | 1.413332  | 3.035410  | 3.687122  | -1.555365 | -3.045564 | 3.693040  | 1.519744  |
| C | -0.658923 | 3.670814  | 0.892579  | 0.719646  | 3.686153  | -0.852924 | -0.722582 | 3.690786  | 0.830189  |
| C | -1.748162 | 4.394952  | 1.355426  | 1.821084  | 4.355517  | -1.392573 | -1.825507 | 4.359812  | 1.356756  |
| H | -3.863519 | 4.314887  | 1.802262  | 3.890901  | 4.185392  | -2.002617 | -3.900672 | 4.195112  | 1.962869  |
| H | 0.321240  | 4.137174  | 0.893795  | -0.227634 | 4.210758  | -0.783475 | 0.223942  | 4.216964  | 0.765033  |
| H | -1.627311 | 5.422163  | 1.689103  | 1.724216  | 5.392801  | -1.704551 | -1.730456 | 5.398804  | 1.664216  |
| C | -3.419971 | -0.078519 | -0.480779 | 3.394838  | -0.067628 | 0.490379  | -3.407306 | -0.070583 | -0.484462 |
| C | -4.153667 | 0.769102  | -1.324915 | 4.173312  | 0.830303  | 1.251997  | -4.180214 | 0.820274  | -1.255277 |
| C | -3.788503 | -1.430842 | -0.338760 | 3.762162  | -1.432898 | 0.396727  | -3.776180 | -1.430897 | -0.372242 |
| C | -5.284766 | 0.298542  | -1.984984 | 5.325815  | 0.392424  | 1.886705  | -5.341049 | 0.380815  | -1.876163 |
| C | -4.920529 | -1.882380 | -1.028196 | 4.932664  | -1.838592 | 1.042741  | -4.954376 | -1.839548 | -1.003586 |
| C | -5.676423 | -1.031193 | -1.833458 | 5.715365  | -0.945111 | 1.776845  | -5.737915 | -0.951378 | -1.742559 |
| H | -5.843226 | 0.969311  | -2.632659 | 5.907810  | 1.090075  | 2.482144  | -5.922414 | 1.073404  | -2.478005 |
| H | -5.225182 | -2.918946 | -0.937950 | 5.248645  | -2.873413 | 0.984341  | -5.273711 | -2.872402 | -0.931053 |
| H | -6.555958 | -1.409905 | -2.347177 | 6.614582  | -1.298678 | 2.273366  | -6.643318 | -1.306555 | -2.226614 |
| H | -4.128359 | 1.979656  | 1.093289  | 4.079782  | 1.823051  | -1.287447 | -4.087580 | 1.830524  | 1.257553  |
| H | -3.829417 | 1.792343  | -1.475398 | 3.847326  | 1.857074  | 1.363700  | -3.847558 | 1.842903  | -1.384443 |
| C | -2.919088 | -2.318021 | 0.554749  | 2.892412  | -2.364088 | -0.444137 | -2.892898 | -2.358494 | 0.458569  |
| C | -3.161399 | -3.815471 | 0.310914  | 3.115882  | -3.846720 | -0.099853 | -3.122606 | -3.841924 | 0.122830  |
| H | -2.960207 | -4.102618 | -0.725941 | 2.883178  | -4.063615 | 0.947050  | -2.907657 | -4.062423 | -0.927081 |
| H | -2.526753 | -4.419079 | 0.965631  | 2.496836  | -4.486195 | -0.733606 | -2.492542 | -4.479045 | 0.747925  |



|                |           |                      |           |           |                      |           |           |                      |           |
|----------------|-----------|----------------------|-----------|-----------|----------------------|-----------|-----------|----------------------|-----------|
| H              | -4.194376 | -4.084115            | 0.548048  | 4.151552  | -4.136855            | -0.291779 | -4.154967 | -4.131278            | 0.333350  |
| C              | -3.248098 | -2.019867            | 2.045739  | 3.262894  | -2.164168            | -1.950495 | -3.235485 | -2.153272            | 1.969323  |
| H              | -4.293132 | -2.270970            | 2.258266  | 4.309021  | -2.442442            | -2.114571 | -4.277822 | -2.432743            | 2.154537  |
| H              | -2.607623 | -2.620633            | 2.700487  | 2.629706  | -2.798233            | -2.578922 | -2.589766 | -2.783532            | 2.588752  |
| H              | -3.094317 | -0.967440            | 2.295368  | 3.128002  | -1.127236            | -2.266883 | -3.097037 | -1.115018            | 2.279924  |
| <b>2DMACBN</b> |           | <b>S<sub>0</sub></b> |           |           | <b>S<sub>1</sub></b> |           |           | <b>T<sub>1</sub></b> |           |
| C              | -0.581905 | -2.285371            | -0.122308 | -0.612975 | -2.267943            | -0.111444 | -0.611729 | -2.258502            | -0.135545 |
| C              | 0.730437  | -2.753262            | -0.097671 | 0.684716  | -2.771304            | -0.118725 | 0.685376  | -2.767551            | -0.133859 |
| C              | 1.836920  | -1.910266            | 0.058250  | 1.796914  | -1.926398            | 0.005414  | 1.796347  | -1.918737            | 0.008359  |
| C              | 1.571908  | -0.531527            | 0.135663  | 1.543421  | -0.529721            | 0.100558  | 1.546224  | -0.526601            | 0.099254  |
| C              | 0.255245  | -0.015703            | 0.139767  | 0.247593  | 0.009214             | 0.137883  | 0.247199  | 0.021594             | 0.130621  |
| C              | -0.832156 | -0.914184            | 0.028146  | -0.832945 | -0.880029            | 0.063578  | -0.833496 | -0.877093            | 0.047889  |
| H              | -1.395333 | -2.988181            | -0.260833 | -1.448330 | -2.942604            | -0.262063 | -1.447220 | -2.932649            | -0.290152 |
| H              | 0.881610  | -3.822531            | -0.199414 | 0.819244  | -3.839331            | -0.236539 | 0.820083  | -3.834521            | -0.255741 |
| B              | 0.015666  | 1.480135             | 0.249548  | 0.015352  | 1.529480             | 0.213741  | 0.017957  | 1.526367             | 0.214383  |
| N              | 2.654694  | 0.360720             | 0.181608  | 2.631159  | 0.348893             | 0.156265  | 2.637156  | 0.352236             | 0.152938  |
| N              | -2.140140 | -0.400564            | 0.023917  | -2.137824 | -0.361770            | 0.067634  | -2.141964 | -0.359116            | 0.062981  |
| C              | 2.509186  | 1.656435             | 0.722395  | 2.498228  | 1.642735             | 0.759360  | 2.507434  | 1.645806             | 0.744696  |
| C              | 3.633753  | 2.297845             | 1.280371  | 3.609156  | 2.195367             | 1.405082  | 3.624717  | 2.207567             | 1.377855  |
| C              | 1.232787  | 2.284661             | 0.765680  | 1.236175  | 2.315487             | 0.721231  | 1.241823  | 2.314651             | 0.716424  |
| C              | 3.510429  | 3.551432             | 1.863234  | 3.537755  | 3.475034             | 1.965816  | 3.552815  | 3.483981             | 1.937183  |
| C              | 1.154968  | 3.552519             | 1.384478  | 1.217740  | 3.612212             | 1.298027  | 1.224360  | 3.610560             | 1.293781  |
| C              | 2.265330  | 4.191077             | 1.919195  | 2.335984  | 4.187400             | 1.894149  | 2.344837  | 4.190461             | 1.877865  |
| H              | 4.387660  | 4.021031             | 2.301859  | 4.409506  | 3.898361             | 2.456973  | 4.426026  | 3.911898             | 2.421626  |
| H              | 0.182925  | 4.029213             | 1.468555  | 0.281295  | 4.161584             | 1.306576  | 0.285826  | 4.155982             | 1.312964  |
| H              | 2.168497  | 5.164526             | 2.392707  | 2.267818  | 5.184142             | 2.324895  | 2.276013  | 5.186158             | 2.310935  |
| C              | 3.827199  | -0.044050            | -0.517039 | 3.815204  | -0.042233            | -0.504862 | 3.822485  | -0.046619            | -0.506547 |
| C              | 4.156204  | -1.414699            | -0.553983 | 4.132280  | -1.418093            | -0.590344 | 4.136971  | -1.422220            | -0.577046 |
| C              | 4.578691  | 0.883452             | -1.255093 | 4.619736  | 0.910836             | -1.158329 | 4.622318  | 0.898980             | -1.173464 |
| C              | 5.267277  | -1.804275            | -1.312150 | 5.277778  | -1.784739            | -1.304566 | 5.281941  | -1.797176            | -1.288586 |
| C              | 5.688368  | 0.470003             | -1.985875 | 5.750842  | 0.514421             | -1.859695 | 5.754304  | 0.495433             | -1.870650 |
| C              | 6.040550  | -0.878866            | -2.012407 | 6.090278  | -0.838236            | -1.929757 | 6.093863  | -0.857325            | -1.924051 |
| H              | 5.542780  | -2.851754            | -1.359910 | 5.549568  | -2.831027            | -1.383926 | 5.553055  | -2.844308            | -1.357643 |
| H              | 6.260542  | 1.202528             | -2.549275 | 6.355331  | 1.262704             | -2.365331 | 6.357808  | 1.237820             | -2.385939 |
| H              | 6.902804  | -1.213860            | -2.582721 | 6.971964  | -1.159241            | -2.477571 | 6.975468  | -1.184431            | -2.468437 |
| C              | -2.399799 | 0.940218             | -0.325261 | -2.408822 | 0.974750             | -0.364992 | -2.414111 | 0.976378             | -0.351812 |
| C              | -3.690270 | 1.242442             | -0.824180 | -3.691204 | 1.237506             | -0.871986 | -3.701797 | 1.244767             | -0.851970 |
| C              | -1.397706 | 1.937267             | -0.177268 | -1.394995 | 1.971265             | -0.222148 | -1.398140 | 1.972540             | -0.207057 |
| C              | -3.980680 | 2.575730             | -1.109761 | -4.006370 | 2.568170             | -1.201088 | -4.017047 | 2.574651             | -1.167465 |
| C              | -1.746284 | 3.258837             | -0.526625 | -1.775673 | 3.283735             | -0.590442 | -1.781844 | 3.286610             | -0.562900 |
| C              | -3.020460 | 3.584199             | -0.964551 | -3.054121 | 3.578304             | -1.051963 | -3.061799 | 3.584007             | -1.014687 |
| H              | -4.960543 | 2.845114             | -1.488047 | -4.989119 | 2.821127             | -1.579951 | -5.000242 | 2.832177             | -1.541965 |
| H              | -0.989539 | 4.035028             | -0.467250 | -1.040415 | 4.079843             | -0.527128 | -1.046835 | 4.082793             | -0.499206 |
| H              | -3.272832 | 4.609960             | -1.220902 | -3.314785 | 4.601513             | -1.314462 | -3.323678 | 4.609018             | -1.268852 |
| C              | -3.236577 | -1.136767            | 0.556779  | -3.209977 | -1.092158            | 0.607561  | -3.213861 | -1.099905            | 0.598167  |
| C              | -4.524058 | -0.896650            | 0.039934  | -4.508913 | -0.874141            | 0.091256  | -4.512088 | -0.882669            | 0.084303  |

|   |           |           |           |           |           |           |           |           |           |
|---|-----------|-----------|-----------|-----------|-----------|-----------|-----------|-----------|-----------|
| C | -3.061413 | -1.997995 | 1.650437  | -3.011436 | -1.952845 | 1.706077  | -3.010380 | -1.965858 | 1.689574  |
| C | -5.605723 | -1.565943 | 0.625356  | -5.569439 | -1.562315 | 0.686965  | -5.570058 | -1.581880 | 0.672653  |
| C | -4.151494 | -2.664312 | 2.202228  | -4.085113 | -2.633844 | 2.265520  | -4.081461 | -2.655255 | 2.244904  |
| H | -2.073899 | -2.133850 | 2.076055  | -2.021802 | -2.049162 | 2.138073  | -2.019395 | -2.063276 | 2.117847  |
| C | -5.429983 | -2.453422 | 1.686677  | -5.369943 | -2.442443 | 1.753606  | -5.366462 | -2.468194 | 1.732766  |
| H | -6.608791 | -1.397757 | 0.250018  | -6.578316 | -1.419988 | 0.317054  | -6.579349 | -1.441364 | 0.303282  |
| H | -3.999258 | -3.330150 | 3.047765  | -3.921249 | -3.288136 | 3.117475  | -3.914419 | -3.314765 | 3.092142  |
| H | -6.288654 | -2.965209 | 2.113000  | -6.218723 | -2.961870 | 2.190094  | -6.212597 | -2.995911 | 2.164394  |
| C | -4.648479 | 0.083210  | -1.127673 | -4.653433 | 0.065395  | -1.105191 | -4.661872 | 0.073439  | -1.098387 |
| C | -4.181804 | -0.621286 | -2.434479 | -4.216752 | -0.691533 | -2.394854 | -4.226242 | -0.663637 | -2.399625 |
| H | -4.231166 | 0.077014  | -3.276862 | -4.283247 | -0.023295 | -3.259712 | -4.296498 | 0.016382  | -3.254921 |
| H | -3.155321 | -0.986855 | -2.357920 | -3.187466 | -1.051767 | -2.326761 | -3.196207 | -1.023044 | -2.339409 |
| H | -4.832242 | -1.475144 | -2.653774 | -4.870654 | -1.553144 | -2.570268 | -4.879002 | -1.523870 | -2.585098 |
| C | -6.094833 | 0.556079  | -1.342038 | -6.106379 | 0.526776  | -1.305064 | -6.116148 | 0.534802  | -1.287874 |
| H | -6.157132 | 1.235523  | -2.196130 | -6.185590 | 1.178202  | -2.178809 | -6.199510 | 1.197457  | -2.152718 |
| H | -6.746846 | -0.290264 | -1.574237 | -6.761767 | -0.327070 | -1.497244 | -6.770369 | -0.317720 | -1.489316 |
| H | -6.495558 | 1.069361  | -0.462276 | -6.489021 | 1.068690  | -0.434670 | -6.497080 | 1.064236  | -0.409113 |
| H | 4.283383  | 1.926291  | -1.268584 | 4.338730  | 1.956528  | -1.128814 | 4.338830  | 1.944371  | -1.157902 |
| H | 4.596869  | 1.799473  | 1.280827  | 4.535694  | 1.633875  | 1.467817  | 4.552944  | 1.648397  | 1.434983  |
| C | 3.279597  | -2.389627 | 0.238188  | 3.232919  | -2.420901 | 0.133888  | 3.231595  | -2.416682 | 0.151640  |
| C | 3.656500  | -2.298743 | 1.744843  | 3.603857  | -2.416682 | 1.652124  | 3.592695  | -2.401764 | 1.670942  |
| H | 3.538664  | -1.284115 | 2.132960  | 3.501146  | -1.421693 | 2.091352  | 3.492564  | -1.402782 | 2.101611  |
| H | 3.016167  | -2.963684 | 2.334683  | 2.952069  | -3.103140 | 2.202323  | 2.933330  | -3.079803 | 2.222550  |
| H | 4.699200  | -2.601166 | 1.892737  | 4.641280  | -2.743335 | 1.778413  | 4.627286  | -2.733429 | 1.807810  |
| C | 3.470963  | -3.847503 | -0.208449 | 3.408490  | -3.856736 | -0.388683 | 3.407476  | -3.856675 | -0.358843 |
| H | 3.231064  | -3.988496 | -1.267048 | 3.167668  | -3.936897 | -1.453132 | 3.173356  | -3.945135 | -1.424111 |
| H | 4.501218  | -4.173341 | -0.041827 | 4.435035  | -4.199903 | -0.239437 | 4.432308  | -4.201049 | -0.200147 |
| H | 2.837416  | -4.516202 | 0.380582  | 2.770583  | -4.550099 | 0.165001  | 2.763880  | -4.543617 | 0.196140  |

**TMCzDMACBN**

|   | <b>S<sub>0</sub></b> |           |           | <b>S<sub>1</sub></b> |           |           | <b>T<sub>1</sub></b> |           |           |
|---|----------------------|-----------|-----------|----------------------|-----------|-----------|----------------------|-----------|-----------|
| C | -1.862369            | -1.994404 | 0.207750  | -1.834438            | -2.016976 | 0.173681  | -1.836779            | -2.010757 | 0.167635  |
| C | -0.794110            | -2.878853 | 0.058123  | -0.754983            | -2.910343 | 0.070627  | -0.762560            | -2.905686 | 0.048858  |
| C | 0.532555             | -2.457485 | -0.027095 | 0.553446             | -2.458608 | 0.007806  | 0.548581             | -2.448976 | -0.025917 |
| C | 0.835459             | -1.096105 | 0.074914  | 0.843392             | -1.073861 | 0.107158  | 0.842221             | -1.073580 | 0.082872  |
| C | -0.219544            | -0.141019 | 0.154669  | -0.208592            | -0.130613 | 0.155122  | -0.207518            | -0.120397 | 0.138365  |
| C | -1.552295            | -0.619244 | 0.191540  | -1.525029            | -0.635398 | 0.169189  | -1.527509            | -0.629678 | 0.158031  |
| H | -0.981917            | -3.945906 | 0.010873  | -0.931708            | -3.976367 | 0.003233  | -0.938536            | -3.971558 | -0.016389 |
| H | 1.298275             | -3.197549 | -0.204511 | 1.339098             | -3.177587 | -0.172261 | 1.332303             | -3.169587 | -0.210204 |
| B | 0.035259             | 1.369191  | 0.149814  | 0.039268             | 1.395985  | 0.112250  | 0.040484             | 1.394323  | 0.110376  |
| N | 2.149683             | -0.605815 | 0.047386  | 2.150231             | -0.593025 | 0.057982  | 2.155411             | -0.593282 | 0.045488  |
| N | -2.619562            | 0.293524  | 0.173509  | -2.594579            | 0.279648  | 0.139483  | -2.598219            | 0.283108  | 0.136013  |
| C | 2.416549             | 0.739761  | -0.195236 | 2.421908             | 0.761062  | -0.217909 | 2.430657             | 0.759752  | -0.215733 |
| C | 3.801742             | 0.927557  | -0.392867 | 3.800199             | 0.933087  | -0.422474 | 3.810851             | 0.932805  | -0.411916 |
| C | 1.478889             | 1.784200  | -0.212759 | 1.468975             | 1.802908  | -0.235994 | 1.479133             | 1.803955  | -0.226398 |
| C | 4.271156             | 2.203519  | -0.693506 | 4.290722             | 2.215756  | -0.728274 | 4.303493             | 2.215128  | -0.704120 |
| C | 2.008996             | 3.052454  | -0.537159 | 2.020519             | 3.075954  | -0.564199 | 2.032492             | 3.075984  | -0.544191 |
| C | 3.369915             | 3.279998  | -0.787189 | 3.385580             | 3.286799  | -0.814194 | 3.397987             | 3.288730  | -0.786716 |

|   |           |           |           |           |           |           |           |           |           |
|---|-----------|-----------|-----------|-----------|-----------|-----------|-----------|-----------|-----------|
| H | 5.332548  | 2.372574  | -0.862246 | 5.352107  | 2.379508  | -0.894452 | 5.365759  | 2.380500  | -0.863093 |
| H | 1.329931  | 3.897258  | -0.610781 | 1.350967  | 3.927971  | -0.641169 | 1.364876  | 3.929552  | -0.617182 |
| C | 3.387663  | -1.285379 | 0.103420  | 3.383305  | -1.275194 | 0.124884  | 3.384892  | -1.277031 | 0.115336  |
| C | 3.711089  | -2.596180 | 0.468975  | 3.708586  | -2.571834 | 0.536655  | 3.704613  | -2.579716 | 0.516510  |
| C | 4.424633  | -0.364369 | -0.196839 | 4.417012  | -0.353605 | -0.205016 | 4.424111  | -0.357109 | -0.201484 |
| C | 5.052191  | -2.977766 | 0.461112  | 5.048002  | -2.960841 | 0.528577  | 5.041726  | -2.970887 | 0.512224  |
| H | 2.966225  | -3.307257 | 0.798929  | 2.966943  | -3.267544 | 0.906982  | 2.958616  | -3.276479 | 0.875610  |
| C | 5.760337  | -0.776101 | -0.201446 | 5.751468  | -0.773522 | -0.206982 | 5.757350  | -0.780536 | -0.201337 |
| C | 6.092833  | -2.096022 | 0.112142  | 6.083660  | -2.085989 | 0.141924  | 6.083147  | -2.096276 | 0.137363  |
| H | 5.297915  | -3.997326 | 0.749457  | 5.296183  | -3.969434 | 0.850268  | 5.286131  | -3.982417 | 0.827646  |
| H | 6.544613  | -0.060264 | -0.435761 | 6.537515  | -0.068117 | -0.465537 | 6.546493  | -0.075294 | -0.450635 |
| C | -2.455237 | 1.625406  | 0.605235  | -2.446486 | 1.607456  | 0.646031  | -2.449368 | 1.609944  | 0.628393  |
| C | -3.567743 | 2.328811  | 1.110440  | -3.551547 | 2.226512  | 1.245325  | -3.559567 | 2.240848  | 1.212425  |
| C | -1.170540 | 2.231527  | 0.588879  | -1.176804 | 2.244706  | 0.565475  | -1.172800 | 2.243644  | 0.551945  |
| C | -3.421785 | 3.626567  | 1.579443  | -3.448446 | 3.537546  | 1.717532  | -3.456947 | 3.551280  | 1.675027  |
| C | -1.069152 | 3.548945  | 1.090655  | -1.122510 | 3.568847  | 1.053189  | -1.124064 | 3.575835  | 1.026668  |
| C | -2.166576 | 4.249547  | 1.570576  | -2.230934 | 4.212710  | 1.605041  | -2.233064 | 4.223038  | 1.563954  |
| H | -4.288600 | 4.146888  | 1.979816  | -4.310789 | 4.015151  | 2.174262  | -4.318983 | 4.034758  | 2.125703  |
| H | -0.089860 | 4.015490  | 1.128841  | -0.173848 | 4.094703  | 1.023921  | -0.175004 | 4.100913  | 1.002047  |
| H | -2.052399 | 5.259917  | 1.954383  | -2.139386 | 5.234358  | 1.966610  | -2.142036 | 5.246766  | 1.920167  |
| C | -3.802463 | -0.136938 | -0.494382 | -3.783526 | -0.123733 | -0.495743 | -3.795520 | -0.128126 | -0.490743 |
| C | -4.526161 | 0.745538  | -1.311050 | -4.552551 | 0.803999  | -1.227980 | -4.558832 | 0.789963  | -1.236422 |
| C | -4.170890 | -1.494540 | -0.415757 | -4.150188 | -1.490408 | -0.465560 | -4.162841 | -1.491156 | -0.439474 |
| C | -5.647194 | 0.302647  | -2.006509 | -5.697999 | 0.392918  | -1.894427 | -5.710303 | 0.373444  | -1.891369 |
| C | -5.292328 | -1.917226 | -1.139944 | -5.311966 | -1.870570 | -1.143265 | -5.329478 | -1.878438 | -1.105974 |
| C | -6.038446 | -1.032934 | -1.918270 | -6.087770 | -0.947734 | -1.847135 | -6.105507 | -0.963574 | -1.819220 |
| H | -6.197949 | 1.000182  | -2.632172 | -6.273993 | 1.115931  | -2.465165 | -6.285397 | 1.089635  | -2.471486 |
| H | -5.596577 | -2.957052 | -1.098711 | -5.625691 | -2.907812 | -1.133640 | -5.645054 | -2.914829 | -1.080723 |
| H | -6.910050 | -1.390166 | -2.460157 | -6.981163 | -1.280292 | -2.368219 | -7.003172 | -1.300724 | -2.329992 |
| H | -4.538054 | 1.847026  | 1.158115  | -4.488922 | 1.689804  | 1.347437  | -4.498083 | 1.706007  | 1.313119  |
| H | -4.201666 | 1.774752  | -1.412356 | -4.228165 | 1.835535  | -1.290259 | -4.229304 | 1.818629  | -1.317470 |
| C | -3.312931 | -2.417666 | 0.452015  | -3.284175 | -2.456191 | 0.340046  | -3.285021 | -2.449503 | 0.362605  |
| C | 3.873615  | 4.657007  | -1.151337 | 3.882760  | 4.661203  | -1.197913 | 3.900875  | 4.664974  | -1.153612 |
| H | 4.236887  | 4.689370  | -2.186467 | 3.912408  | 4.783068  | -2.289315 | 4.041877  | 4.759356  | -2.238868 |
| H | 3.086004  | 5.410042  | -1.055445 | 3.234295  | 5.449403  | -0.801916 | 3.198482  | 5.446146  | -0.847063 |
| H | 4.708384  | 4.962713  | -0.509527 | 4.897683  | 4.840385  | -0.826815 | 4.868759  | 4.877321  | -0.685862 |
| C | 7.525051  | -2.571689 | 0.086440  | 7.515388  | -2.561127 | 0.122623  | 7.512932  | -2.577369 | 0.121100  |
| H | 7.721276  | -3.198393 | -0.793364 | 7.691084  | -3.263430 | -0.702978 | 7.688961  | -3.274869 | -0.708369 |
| H | 8.226122  | -1.732362 | 0.053479  | 8.213917  | -1.728178 | -0.000007 | 8.215431  | -1.746586 | 0.007003  |
| H | 7.764264  | -3.175334 | 0.969205  | 7.777070  | -3.086735 | 1.048545  | 7.768192  | -3.110071 | 1.044681  |
| C | -3.550074 | -3.903715 | 0.142642  | -3.506009 | -3.923340 | -0.065386 | -3.512132 | -3.919592 | -0.027992 |
| H | -3.333865 | -4.147329 | -0.902322 | -3.269735 | -4.097365 | -1.119505 | -3.291144 | -4.102249 | -1.083940 |
| H | -2.923929 | -4.533665 | 0.780504  | -2.889525 | -4.588665 | 0.543915  | -2.885858 | -4.579245 | 0.577437  |
| H | -4.585984 | -4.182617 | 0.353740  | -4.542644 | -4.220284 | 0.110407  | -4.545988 | -4.215677 | 0.165381  |
| C | -3.663277 | -2.182195 | 1.949384  | -3.658141 | -2.318714 | 1.852154  | -3.634134 | -2.300342 | 1.877986  |
| H | -4.711009 | -2.442054 | 2.136841  | -4.704500 | -2.604485 | 2.001207  | -4.677017 | -2.587721 | 2.047533  |

|                  |           |                      |           |           |                      |           |           |                      |           |
|------------------|-----------|----------------------|-----------|-----------|----------------------|-----------|-----------|----------------------|-----------|
| H                | -3.031483 | -2.809665            | 2.587354  | -3.026389 | -2.977501            | 2.456290  | -2.990783 | -2.952222            | 2.477404  |
| H                | -3.513585 | -1.141120            | 2.244886  | -3.525687 | -1.295467            | 2.211133  | -3.498985 | -1.274036            | 2.227089  |
| <b>PXZTMCzBN</b> |           | <b>S<sub>0</sub></b> |           |           | <b>S<sub>1</sub></b> |           |           | <b>T<sub>1</sub></b> |           |
| C                | 1.859406  | -1.577052            | 0.184464  | 1.836869  | -1.588209            | 0.209054  | -1.827813 | -1.586579            | -0.192352 |
| C                | 0.888260  | -2.552641            | 0.432107  | 0.864726  | -2.553801            | 0.506751  | -0.848215 | -2.556197            | -0.493442 |
| C                | -0.482939 | -2.252830            | 0.464785  | -0.506515 | -2.217666            | 0.522698  | 0.514575  | -2.220194            | -0.506359 |
| C                | -0.884151 | -0.908943            | 0.204873  | -0.875109 | -0.890301            | 0.172066  | 0.881385  | -0.884955            | -0.162123 |
| C                | 0.075267  | 0.116552             | 0.027596  | 0.077003  | 0.133777             | -0.010948 | -0.075516 | 0.144831             | 0.012709  |
| C                | 1.415375  | -0.261413            | -0.004313 | 1.404111  | -0.265916            | -0.032571 | -1.401723 | -0.263516            | 0.044464  |
| H                | 1.193547  | -3.571615            | 0.658339  | 1.156120  | -3.564866            | 0.776161  | -1.142076 | -3.562583            | -0.776137 |
| B                | -0.235102 | 1.600033             | 0.075659  | -0.221594 | 1.629715             | 0.038561  | 0.215060  | 1.635179             | -0.045762 |
| N                | -2.228012 | -0.497754            | 0.202402  | -2.236316 | -0.447667            | 0.095539  | 2.234720  | -0.435797            | -0.085433 |
| N                | 2.482332  | 0.609437             | -0.156687 | 2.476287  | 0.590157             | -0.213426 | -2.479452 | 0.589705             | 0.214378  |
| C                | -2.581232 | 0.822823             | 0.562889  | -2.592550 | 0.851079             | 0.557294  | 2.588585  | 0.864328             | -0.541068 |
| C                | -3.919563 | 1.017255             | 0.958093  | -3.921331 | 1.038756             | 0.955362  | 3.918965  | 1.053431             | -0.938055 |
| C                | -1.671716 | 1.912508             | 0.566072  | -1.663782 | 1.926971             | 0.574785  | 1.649654  | 1.939520             | -0.566672 |
| C                | -4.359683 | 2.246679             | 1.419389  | -4.364594 | 2.247157             | 1.505551  | 4.361199  | 2.264359             | -1.484086 |
| C                | -2.146509 | 3.146467             | 1.070561  | -2.137278 | 3.125691             | 1.136216  | 2.128520  | 3.142010             | -1.122244 |
| C                | -3.455619 | 3.314546             | 1.497229  | -3.449765 | 3.285052             | 1.611024  | 3.442318  | 3.300722             | -1.585809 |
| H                | -5.393124 | 2.348255             | 1.736429  | -5.403071 | 2.347536             | 1.802777  | 5.399480  | 2.368109             | -1.779589 |
| H                | -1.456161 | 3.979452             | 1.151997  | -1.460517 | 3.970797             | 1.207331  | 1.449967  | 3.984625             | -1.203537 |
| H                | -3.789541 | 4.271189             | 1.889644  | -3.761152 | 4.236341             | 2.033676  | 3.754850  | 4.253487             | -2.005229 |
| C                | -3.261150 | -1.221342            | -0.451141 | -3.238787 | -1.174719            | -0.523072 | 3.245271  | -1.173746            | 0.515930  |
| C                | -3.050885 | -2.095730            | -1.522461 | -3.013529 | -2.150576            | -1.515464 | 3.019031  | -2.147213            | 1.509688  |
| C                | -4.578458 | -0.970384            | -0.039143 | -4.582167 | -0.912273            | -0.139459 | 4.581978  | -0.912994            | 0.123553  |
| C                | -4.129015 | -2.770969            | -2.099206 | -4.078267 | -2.860458            | -2.050738 | 4.082069  | -2.864409            | 2.035771  |
| H                | -2.044047 | -2.252374            | -1.893974 | -2.000484 | -2.328003            | -1.856889 | 2.007244  | -2.312858            | 1.860552  |
| C                | -5.656728 | -1.633356            | -0.613423 | -5.645923 | -1.642202            | -0.665480 | 5.645362  | -1.654154            | 0.636017  |
| C                | -5.427596 | -2.556051            | -1.636727 | -5.394547 | -2.623954            | -1.618640 | 5.394574  | -2.636471            | 1.587763  |
| H                | -3.946529 | -3.461392            | -2.917849 | -3.887530 | -3.601719            | -2.821379 | 3.894764  | -3.602083            | 2.810361  |
| H                | -6.657900 | -1.412667            | -0.256344 | -6.651506 | -1.414884            | -0.326754 | 6.649995  | -1.431892            | 0.291511  |
| H                | -6.265350 | -3.084466            | -2.082588 | -6.219019 | -3.190857            | -2.039845 | 6.219462  | -3.209541            | 1.999820  |
| C                | 2.269815  | 1.961867             | -0.483693 | 2.275403  | 1.957039             | -0.544565 | -2.286883 | 1.958885             | 0.533776  |
| C                | 3.309312  | 2.746304             | -1.014815 | 3.313176  | 2.712435             | -1.098619 | -3.330894 | 2.713938             | 1.081907  |
| C                | 0.957365  | 2.517048             | -0.325781 | 0.966645  | 2.531144             | -0.335532 | -0.984085 | 2.536978             | 0.329810  |
| C                | 3.092913  | 4.080141             | -1.338885 | 3.141866  | 4.072400             | -1.374061 | -3.162145 | 4.071695             | 1.356040  |
| C                | 0.793383  | 3.873147             | -0.683395 | 0.855449  | 3.918049             | -0.631174 | -0.872770 | 3.918494             | 0.628972  |
| C                | 1.832582  | 4.658823             | -1.165070 | 1.908575  | 4.680216             | -1.118302 | -1.929371 | 4.682167             | 1.109686  |
| H                | 3.911922  | 4.662140             | -1.754323 | 3.964862  | 4.639825             | -1.800212 | -3.988464 | 4.638097             | 1.777611  |
| H                | -0.197793 | 4.308990             | -0.611828 | -0.113802 | 4.392899             | -0.512015 | 0.097294  | 4.392917             | 0.514958  |
| H                | 1.661595  | 5.698489             | -1.430949 | 1.764449  | 5.737288             | -1.330732 | -1.787577 | 5.738978             | 1.323878  |
| C                | 3.664891  | -0.152988            | -0.003541 | 3.645615  | -0.174030            | -0.034970 | -3.643437 | -0.180469            | 0.034693  |
| C                | 5.009194  | 0.223985             | 0.078467  | 4.993560  | 0.191495             | 0.036897  | -4.993325 | 0.176848             | -0.044446 |
| C                | 3.303801  | -1.517875            | 0.178116  | 3.276163  | -1.535442            | 0.192956  | -3.262985 | -1.541459            | -0.185404 |
| C                | 5.969387  | -0.767833            | 0.272629  | 5.945538  | -0.802406            | 0.263089  | -5.937871 | -0.823234            | -0.270642 |
| C                | 4.291270  | -2.490660            | 0.365945  | 4.258658  | -2.510427            | 0.410601  | -4.241140 | -2.523936            | -0.403910 |

|                  |           |                      |           |           |                      |           |           |                      |           |
|------------------|-----------|----------------------|-----------|-----------|----------------------|-----------|-----------|----------------------|-----------|
| C                | 5.639938  | -2.131261            | 0.400073  | 5.608903  | -2.161622            | 0.432640  | -5.591201 | -2.182350            | -0.433922 |
| H                | 7.012618  | -0.467518            | 0.338345  | 6.991170  | -0.507623            | 0.318837  | -6.985113 | -0.535632            | -0.332454 |
| H                | 4.003454  | -3.530829            | 0.498597  | 3.962097  | -3.543743            | 0.575365  | -3.938159 | -3.556353            | -0.561999 |
| H                | 4.273143  | 2.308923             | -1.231355 | 4.253320  | 2.244613             | -1.357062 | -4.270577 | 2.244409             | 1.338719  |
| H                | 5.325622  | 1.257598             | 0.040437  | 5.316775  | 1.220918             | -0.038825 | -5.323535 | 1.204489             | 0.025815  |
| C                | 6.723601  | -3.167123            | 0.576017  | 6.687161  | -3.196933            | 0.640959  | -6.663759 | -3.222498            | -0.647846 |
| H                | 7.444204  | -2.868097            | 1.345875  | 7.390679  | -2.893299            | 1.425169  | -7.335114 | -2.945056            | -1.469381 |
| H                | 6.308180  | -4.137333            | 0.864039  | 6.263707  | -4.164131            | 0.927836  | -6.232411 | -4.199667            | -0.884571 |
| H                | 7.289818  | -3.313710            | -0.352891 | 7.275186  | -3.352590            | -0.272911 | -7.287774 | -3.344539            | 0.246861  |
| C                | -1.439571 | -3.336580            | 0.902436  | -1.481937 | -3.265739            | 1.004945  | 1.492522  | -3.265984            | -0.992730 |
| H                | -2.234531 | -2.935968            | 1.538905  | -2.344293 | -2.824060            | 1.511953  | 2.345579  | -2.823638            | -1.514754 |
| H                | -1.928497 | -3.846103            | 0.064933  | -1.870196 | -3.893852            | 0.194800  | 1.894154  | -3.886367            | -0.183817 |
| H                | -0.901355 | -4.094304            | 1.479435  | -0.983260 | -3.928905            | 1.717996  | 0.988437  | -3.936326            | -1.694921 |
| O                | -4.814959 | -0.034911            | 0.943246  | -4.861925 | 0.050598             | 0.782672  | 4.858768  | 0.062636             | -0.784438 |
| <b>PTZTMCzBN</b> |           | <b>S<sub>0</sub></b> |           |           | <b>S<sub>1</sub></b> |           |           | <b>T<sub>1</sub></b> |           |
| C                | 1.979326  | -1.566272            | 0.238141  | 1.961548  | -1.573141            | 0.272912  | -1.947308 | -1.572325            | -0.255032 |
| C                | 0.997657  | -2.536856            | 0.463948  | 0.979276  | -2.529504            | 0.578681  | -0.954183 | -2.533008            | -0.547644 |
| C                | -0.372643 | -2.226822            | 0.467443  | -0.389928 | -2.188830            | 0.566255  | 0.404936  | -2.188984            | -0.529561 |
| C                | -0.758581 | -0.878321            | 0.221279  | -0.746494 | -0.865772            | 0.197152  | 0.757471  | -0.848606            | -0.183014 |
| C                | 0.208224  | 0.133723             | 0.039122  | 0.210005  | 0.142322             | -0.019142 | -0.209834 | 0.163827             | 0.009543  |
| C                | 1.545620  | -0.250909            | 0.026756  | 1.536863  | -0.261372            | -0.016579 | -1.532909 | -0.252622            | 0.016873  |
| H                | 1.290939  | -3.560676            | 0.684049  | 1.262616  | -3.538761            | 0.863471  | -1.235876 | -3.541701            | -0.834628 |
| B                | -0.102563 | 1.615667             | 0.031822  | -0.092612 | 1.632234             | -0.022260 | 0.081306  | 1.651090             | 0.014657  |
| N                | -2.111109 | -0.470989            | 0.213875  | -2.115984 | -0.423493            | 0.105128  | 2.110948  | -0.399840            | -0.090748 |
| N                | 2.616771  | 0.612426             | -0.134299 | 2.611166  | 0.588568             | -0.216812 | -2.615521 | 0.589625             | 0.202594  |
| C                | -2.458776 | 0.853852             | 0.590670  | -2.464093 | 0.868946             | 0.606396  | 2.460773  | 0.900494             | -0.568489 |
| C                | -3.770466 | 1.067084             | 1.066175  | -3.756312 | 1.083276             | 1.109303  | 3.758846  | 1.112928             | -1.063863 |
| C                | -1.539008 | 1.939036             | 0.521125  | -1.516945 | 1.938929             | 0.547069  | 1.506234  | 1.969699             | -0.517863 |
| C                | -4.173744 | 2.333009             | 1.485812  | -4.133547 | 2.327200             | 1.655626  | 4.139901  | 2.363843             | -1.589098 |
| C                | -1.976662 | 3.191514             | 1.004884  | -1.935014 | 3.159010             | 1.105117  | 1.934526  | 3.198254             | -1.057782 |
| C                | -3.266238 | 3.395975             | 1.475962  | -3.206653 | 3.356635             | 1.661582  | 3.212857  | 3.395984             | -1.589905 |
| H                | -5.187826 | 2.476761             | 1.847999  | -5.142474 | 2.471695             | 2.029230  | 5.150973  | 2.512284             | -1.954460 |
| H                | -1.272559 | 4.016745             | 1.029707  | -1.239989 | 3.992414             | 1.105035  | 1.236589  | 4.028847             | -1.070885 |
| H                | -3.574342 | 4.372627             | 1.839332  | -3.476416 | 4.325485             | 2.073242  | 3.490968  | 4.368380             | -1.988409 |
| C                | -3.057079 | -1.168457            | -0.597020 | -3.032684 | -1.137771            | -0.648763 | 3.041702  | -1.138248            | 0.638935  |
| C                | -2.677106 | -1.797367            | -1.790987 | -2.625128 | -1.951003            | -1.732791 | 2.636583  | -1.928804            | 1.737786  |
| C                | -4.412660 | -1.174510            | -0.230086 | -4.425344 | -1.077908            | -0.347446 | 4.421024  | -1.103869            | 0.304189  |
| C                | -3.618738 | -2.482516            | -2.557771 | -3.551651 | -2.677215            | -2.458981 | 3.558545  | -2.684137            | 2.440943  |
| H                | -1.640443 | -1.759044            | -2.108090 | -1.574695 | -1.978484            | -1.996753 | 1.593101  | -1.917950            | 2.030148  |
| C                | -5.358146 | -1.840319            | -1.014969 | -5.349819 | -1.830308            | -1.088447 | 5.341121  | -1.886827            | 1.017293  |
| C                | -4.958884 | -2.515752            | -2.167760 | -4.920479 | -2.630638            | -2.136458 | 4.915254  | -2.679858            | 2.073557  |
| H                | -3.301640 | -2.978604            | -3.471067 | -3.214091 | -3.276766            | -3.299647 | 3.228227  | -3.268858            | 3.294559  |
| H                | -6.402959 | -1.824974            | -0.718301 | -6.404724 | -1.770060            | -0.837508 | 6.391273  | -1.853290            | 0.742697  |
| H                | -5.694441 | -3.045280            | -2.766743 | -5.640582 | -3.203412            | -2.712627 | 5.635297  | -3.274862            | 2.627210  |
| C                | 2.410274  | 1.954470             | -0.505586 | 2.410338  | 1.941668             | -0.598286 | -2.430207 | 1.946913             | 0.574279  |
| C                | 3.459685  | 2.721669             | -1.042683 | 3.453147  | 2.679139             | -1.169328 | -3.484887 | 2.679226             | 1.133562  |

|                  |           |                      |           |           |                      |           |           |                      |           |
|------------------|-----------|----------------------|-----------|-----------|----------------------|-----------|-----------|----------------------|-----------|
| C                | 1.095078  | 2.516342             | -0.389113 | 1.099618  | 2.522428             | -0.426353 | -1.125401 | 2.535262             | 0.414733  |
| C                | 3.249656  | 4.043143             | -1.417215 | 3.281450  | 4.025514             | -1.500180 | -3.322449 | 4.024214             | 1.466463  |
| C                | 0.938473  | 3.858808             | -0.798456 | 0.987413  | 3.893206             | -0.781169 | -1.020652 | 3.901970             | 0.775193  |
| C                | 1.986239  | 4.627067             | -1.289009 | 2.044152  | 4.639848             | -1.286090 | -2.086062 | 4.644742             | 1.269488  |
| H                | 4.076763  | 4.610589             | -1.836693 | 4.108499  | 4.577797             | -1.938484 | -4.157035 | 4.572286             | 1.895953  |
| H                | -0.053744 | 4.296797             | -0.761134 | 0.014716  | 4.368475             | -0.693934 | -0.048922 | 4.380714             | 0.698823  |
| H                | 1.820410  | 5.656227             | -1.595724 | 1.899559  | 5.686576             | -1.544061 | -1.948845 | 5.691277             | 1.531536  |
| C                | 3.794346  | -0.153365            | 0.043303  | 3.777446  | -0.171024            | -0.002725 | -3.773673 | -0.182561            | -0.008995 |
| C                | 5.139518  | 0.218483             | 0.131370  | 5.126172  | 0.193792             | 0.065226  | -5.124446 | 0.168659             | -0.091662 |
| C                | 3.424714  | -1.513352            | 0.245277  | 3.401768  | -1.522997            | 0.269769  | -3.382302 | -1.535382            | -0.262009 |
| C                | 6.092980  | -0.774583            | 0.351344  | 6.074216  | -0.792907            | 0.333214  | -6.060961 | -0.830862            | -0.353480 |
| C                | 4.405443  | -2.487272            | 0.458867  | 4.381250  | -2.491058            | 0.528811  | -4.352692 | -2.517392            | -0.515685 |
| C                | 5.755697  | -2.133869            | 0.499222  | 5.731911  | -2.144252            | 0.548905  | -5.704470 | -2.182903            | -0.549755 |
| H                | 7.136994  | -0.478159            | 0.421834  | 7.120262  | -0.498994            | 0.386032  | -7.109281 | -0.547803            | -0.417594 |
| H                | 4.111074  | -3.523417            | 0.607350  | 4.081577  | -3.517459            | 0.727875  | -4.041848 | -3.543307            | -0.698665 |
| S                | -4.880875 | -0.308448            | 1.241396  | -4.993970 | -0.161330            | 1.025276  | 4.980447  | -0.151801            | -1.051159 |
| H                | 4.427723  | 2.278273             | -1.225118 | 4.397546  | 2.204503             | -1.397929 | -4.428653 | 2.199743             | 1.354103  |
| H                | 5.461416  | 1.249813             | 0.078953  | 5.452407  | 1.219257             | -0.044954 | -5.461838 | 1.192069             | 0.002585  |
| C                | 6.832354  | -3.171854            | 0.703226  | 6.805825  | -3.173939            | 0.803425  | -6.768534 | -3.222995            | -0.802759 |
| H                | 7.550040  | -2.860849            | 1.470995  | 7.499698  | -2.846862            | 1.586895  | -7.431070 | -2.928618            | -1.625540 |
| H                | 6.409729  | -4.133536            | 1.008799  | 6.377158  | -4.131162            | 1.115069  | -6.328917 | -4.191688            | -1.058251 |
| H                | 7.403087  | -3.340858            | -0.219084 | 7.405585  | -3.358970            | -0.097266 | -7.402880 | -3.370337            | 0.080760  |
| C                | -1.357940 | -3.312361            | 0.825876  | -1.389163 | -3.236216            | 0.998133  | 1.408897  | -3.234980            | -0.956250 |
| H                | -2.158974 | -2.928357            | 1.465118  | -2.248990 | -2.797215            | 1.511823  | 2.257585  | -2.798431            | -1.489990 |
| H                | -1.835087 | -3.758351            | -0.054035 | -1.777576 | -3.820412            | 0.155259  | 1.813445  | -3.800949            | -0.109362 |
| H                | -0.850667 | -4.115440            | 1.368468  | -0.914657 | -3.939398            | 1.688881  | 0.929831  | -3.952847            | -1.628183 |
| <b>DPATMCzBN</b> |           | <b>S<sub>0</sub></b> |           |           | <b>S<sub>1</sub></b> |           |           | <b>T<sub>1</sub></b> |           |
| C                | 1.670623  | -1.589139            | -0.163188 | 1.667841  | -1.581847            | -0.242949 | 1.670517  | -1.569147            | -0.258126 |
| C                | 0.666292  | -2.544073            | -0.343232 | 0.691490  | -2.562370            | -0.463002 | 0.689749  | -2.560128            | -0.511804 |
| C                | -0.694087 | -2.211774            | -0.413006 | -0.663399 | -2.220890            | -0.536103 | -0.661050 | -2.221516            | -0.580930 |
| C                | -1.068964 | -0.833018            | -0.273753 | -1.058260 | -0.824624            | -0.342420 | -1.055832 | -0.839788            | -0.372414 |
| C                | -0.066130 | 0.159429             | -0.128042 | -0.087128 | 0.181391             | -0.201533 | -0.080535 | 0.189907             | -0.216968 |
| C                | 1.263234  | -0.256645            | -0.055971 | 1.231437  | -0.230665            | -0.113927 | 1.236515  | -0.224354            | -0.108735 |
| H                | 0.940061  | -3.588135            | -0.473320 | 0.980509  | -3.595443            | -0.628415 | 0.988588  | -3.585477            | -0.701567 |
| B                | -0.324378 | 1.648256             | -0.190404 | -0.379646 | 1.686881             | -0.192151 | -0.371416 | 1.673647             | -0.211712 |
| N                | -2.405497 | -0.382813            | -0.313904 | -2.397279 | -0.418359            | -0.361209 | -2.397318 | -0.417852            | -0.351160 |
| N                | 2.357829  | 0.586683             | 0.074839  | 2.300350  | 0.608038             | 0.088061  | 2.308010  | 0.616955             | 0.104937  |
| C                | -2.742882 | 0.970281             | -0.573160 | -2.782072 | 0.940429             | -0.675985 | -2.782407 | 0.934147             | -0.671082 |
| C                | -4.098921 | 1.310998             | -0.792387 | -4.117936 | 1.197175             | -1.011819 | -4.123553 | 1.189103             | -0.998466 |
| C                | -1.757421 | 2.005470             | -0.626873 | -1.824669 | 2.008541             | -0.632043 | -1.827151 | 2.000533             | -0.650431 |
| C                | -4.462704 | 2.595911             | -1.164332 | -4.543551 | 2.486802             | -1.354466 | -4.545108 | 2.471339             | -1.363933 |
| C                | -2.175577 | 3.288447             | -1.052116 | -2.297481 | 3.283327             | -1.026444 | -2.294049 | 3.264786             | -1.062639 |
| C                | -3.496567 | 3.595618             | -1.331680 | -3.623391 | 3.531476             | -1.378077 | -3.622944 | 3.511069             | -1.415648 |
| H                | -5.513099 | 2.812226             | -1.344872 | -5.587051 | 2.653125             | -1.608085 | -5.589823 | 2.637016             | -1.612819 |
| H                | -1.421951 | 4.059523             | -1.175169 | -1.590504 | 4.105074             | -1.063638 | -1.586502 | 4.085475             | -1.113620 |
| H                | -3.779890 | 4.591770             | -1.660875 | -3.934079 | 4.534563             | -1.661770 | -3.931638 | 4.509107             | -1.717665 |

|                 |           |                      |           |                      |           |           |                      |           |           |
|-----------------|-----------|----------------------|-----------|----------------------|-----------|-----------|----------------------|-----------|-----------|
| C               | -3.436032 | -1.212510            | 0.268430  | -3.356229            | -1.248641 | 0.323331  | -3.352475            | -1.247305 | 0.342893  |
| C               | -4.433474 | -1.804823            | -0.514305 | -4.435387            | -1.854334 | -0.334904 | -4.428805            | -1.864155 | -0.307822 |
| C               | -3.446515 | -1.392863            | 1.655831  | -3.197252            | -1.436977 | 1.703802  | -3.185324            | -1.421535 | 1.723499  |
| C               | -5.431837 | -2.571018            | 0.087957  | -5.345623            | -2.629415 | 0.383445  | -5.332390            | -2.637994 | 0.421091  |
| H               | -4.418476 | -1.671585            | -1.591632 | -4.543833            | -1.745478 | -1.408937 | -4.541652            | -1.764685 | -1.382295 |
| C               | -4.439441 | -2.171053            | 2.253244  | -4.107771            | -2.217790 | 2.415311  | -4.090614            | -2.198899 | 2.444877  |
| C               | -5.436179 | -2.759043            | 1.471945  | -5.186767            | -2.814116 | 1.758718  | -5.168567            | -2.807358 | 1.797200  |
| H               | -6.202159 | -3.027486            | -0.528061 | -6.175489            | -3.098685 | -0.138376 | -6.160869            | -3.117087 | -0.093820 |
| H               | -4.436470 | -2.309805            | 3.331216  | -3.977217            | -2.350579 | 3.486102  | -3.955474            | -2.321638 | 3.516198  |
| H               | -6.211839 | -3.360671            | 1.938279  | -5.898009            | -3.419662 | 2.313925  | -5.874460            | -3.411518 | 2.360599  |
| C               | 2.188637  | 1.949810             | 0.378982  | 2.116784             | 1.980167  | 0.440217  | 2.117289             | 1.981746  | 0.442223  |
| C               | 3.251870  | 2.706341             | 0.904283  | 3.162054             | 2.697980  | 1.022696  | 3.154904             | 2.716495  | 1.028821  |
| C               | 0.893435  | 2.538854             | 0.214718  | 0.813596             | 2.565274  | 0.235221  | 0.816000             | 2.561626  | 0.231625  |
| C               | 3.075098  | 4.046806             | 1.224207  | 3.006617             | 4.051993  | 1.347885  | 2.980885             | 4.062229  | 1.350177  |
| C               | 0.768369  | 3.897709             | 0.578002  | 0.718131             | 3.941212  | 0.588427  | 0.699408             | 3.931213  | 0.587713  |
| C               | 1.829464  | 4.656654             | 1.055932  | 1.777623             | 4.672790  | 1.111729  | 1.746589             | 4.675820  | 1.113305  |
| H               | 3.911342  | 4.607131             | 1.635272  | 3.834440             | 4.596513  | 1.793168  | 3.799736             | 4.614703  | 1.803202  |
| H               | -0.210069 | 4.361336             | 0.517019  | -0.243197            | 4.432658  | 0.487702  | -0.268203            | 4.409898  | 0.483043  |
| H               | 1.684698  | 5.699828             | 1.324045  | 1.638109             | 5.721907  | 1.364164  | 1.597038             | 5.722296  | 1.369124  |
| C               | 3.516517  | -0.218027            | -0.024095 | 3.473555             | -0.177623 | -0.016040 | 3.477167             | -0.169020 | 0.000356  |
| C               | 4.872938  | 0.112485             | -0.112864 | 4.818271             | 0.173032  | -0.087083 | 4.825415             | 0.175394  | -0.050977 |
| C               | 3.114645  | -1.578570            | -0.139647 | 3.098944             | -1.545488 | -0.179776 | 3.092621             | -1.536807 | -0.185193 |
| C               | 5.803696  | -0.917187            | -0.242414 | 5.771106             | -0.845778 | -0.235297 | 5.771864             | -0.844442 | -0.202134 |
| C               | 4.073091  | -2.590175            | -0.263521 | 4.073618             | -2.542145 | -0.319489 | 4.070868             | -2.538541 | -0.327301 |
| C               | 5.432641  | -2.274783            | -0.300000 | 5.431481             | -2.206428 | -0.331193 | 5.423064             | -2.207624 | -0.321007 |
| H               | 6.856372  | -0.653139            | -0.313715 | 6.818748             | -0.558787 | -0.285778 | 6.822164             | -0.564901 | -0.238643 |
| H               | 3.754313  | -3.626612            | -0.345831 | 3.768938             | -3.579377 | -0.434317 | 3.763173             | -3.573139 | -0.456386 |
| H               | -4.877498 | 0.567548             | -0.694369 | -4.852996            | 0.404948  | -1.010164 | -4.860151            | 0.398613  | -0.974324 |
| H               | -2.675513 | -0.924248            | 2.260272  | -2.367443            | -0.956850 | 2.213435  | -2.352660            | -0.936710 | 2.223567  |
| H               | 4.202680  | 2.242071             | 1.121732  | 4.094356             | 2.210493  | 1.271734  | 4.090410             | 2.238996  | 1.285125  |
| H               | 5.220555  | 1.136775             | -0.129426 | 5.149909             | 1.202180  | -0.070223 | 5.163267             | 1.202198  | -0.014670 |
| C               | -1.640352 | -3.344953            | -0.742982 | -1.614747            | -3.319074 | -0.930724 | -1.615957            | -3.322899 | -0.968600 |
| H               | -2.296838 | -3.621347            | 0.086884  | -2.228354            | -3.668917 | -0.094772 | -2.223617            | -3.670681 | -0.127809 |
| H               | -2.279639 | -3.103983            | -1.597193 | -2.299561            | -2.994411 | -1.718948 | -2.304219            | -3.004257 | -1.756432 |
| H               | -1.062571 | -4.233706            | -1.012442 | -1.051743            | -4.176225 | -1.309234 | -1.053161            | -4.180549 | -1.346157 |
| C               | 6.484908  | -3.351757            | -0.407097 | 6.501973             | -3.262791 | -0.449834 | 6.495712             | -3.260437 | -0.453544 |
| H               | 6.043343  | -4.320282            | -0.660074 | 6.084720             | -4.221560 | -0.771220 | 6.066740             | -4.244337 | -0.664143 |
| H               | 7.229798  | -3.111305            | -1.174398 | 7.273991             | -2.972674 | -1.171020 | 7.196287             | -3.019679 | -1.261831 |
| H               | 7.028150  | -3.474681            | 0.538929  | 7.005330             | -3.428524 | 0.511400  | 7.086431             | -3.346330 | 0.467265  |
| <b>CzTMCzBN</b> |           | <b>S<sub>0</sub></b> |           | <b>S<sub>1</sub></b> |           |           | <b>T<sub>1</sub></b> |           |           |
| C               | 1.805838  | -1.593075            | 0.038072  | -1.793171            | -1.595863 | -0.054652 | -1.796009            | -1.588505 | -0.065843 |
| C               | 0.863526  | -2.594977            | 0.265166  | -0.859257            | -2.618001 | -0.287306 | -0.856996            | -2.618089 | -0.323857 |
| C               | -0.516422 | -2.330210            | 0.329762  | 0.504442             | -2.329159 | -0.378183 | 0.502269             | -2.329852 | -0.407070 |
| C               | -0.954526 | -0.999447            | 0.078269  | 0.947706             | -0.968979 | -0.107758 | 0.946825             | -0.978145 | -0.123395 |
| C               | -0.018233 | 0.068074             | -0.025757 | 0.022999             | 0.102722  | -0.046893 | 0.018037             | 0.111141  | -0.061925 |
| C               | 1.331167  | -0.276357            | -0.071992 | -1.313403            | -0.256855 | 0.024917  | -1.317865            | -0.250219 | 0.025838  |

|   |           |           |           |           |           |           |           |           |           |
|---|-----------|-----------|-----------|-----------|-----------|-----------|-----------|-----------|-----------|
| H | 1.196136  | -3.610569 | 0.467383  | -1.196399 | -3.626891 | -0.506084 | -1.201399 | -3.617377 | -0.571107 |
| B | -0.345690 | 1.546847  | 0.166343  | 0.364024  | 1.596696  | -0.190703 | 0.352320  | 1.587592  | -0.208085 |
| N | -2.301014 | -0.590679 | 0.038345  | 2.279481  | -0.581864 | -0.029174 | 2.279553  | -0.581424 | -0.028373 |
| N | 2.384747  | 0.621108  | -0.152717 | -2.361930 | 0.628965  | 0.131922  | -2.366584 | 0.634837  | 0.144538  |
| C | -2.673493 | 0.704896  | 0.405734  | 2.691048  | 0.737881  | -0.380352 | 2.690454  | 0.732916  | -0.382323 |
| C | -4.084156 | 0.785015  | 0.480739  | 4.093257  | 0.774654  | -0.440561 | 4.096057  | 0.773572  | -0.434426 |
| C | -1.812130 | 1.805021  | 0.595807  | 1.836936  | 1.848494  | -0.556035 | 1.841872  | 1.843790  | -0.568670 |
| C | -4.666594 | 1.975544  | 0.912453  | 4.727052  | 1.972210  | -0.830373 | 4.725123  | 1.966084  | -0.829016 |
| C | -2.452607 | 2.980788  | 1.047094  | 2.523521  | 3.025685  | -0.977180 | 2.521833  | 3.013231  | -0.991423 |
| C | -3.836509 | 3.059854  | 1.223213  | 3.915501  | 3.073020  | -1.116458 | 3.916204  | 3.063763  | -1.129509 |
| H | -5.745967 | 2.066074  | 1.004203  | 5.808643  | 2.039772  | -0.898861 | 5.807231  | 2.036363  | -0.891068 |
| H | -1.854475 | 3.859952  | 1.266161  | 1.952115  | 3.921470  | -1.197716 | 1.950571  | 3.908723  | -1.213652 |
| H | -4.280040 | 3.987253  | 1.576134  | 4.381134  | 4.003860  | -1.434049 | 4.381694  | 3.992699  | -1.451451 |
| C | -3.473681 | -1.280693 | -0.332850 | 3.427165  | -1.299943 | 0.337248  | 3.424804  | -1.294411 | 0.348586  |
| C | -3.630904 | -2.469280 | -1.049020 | 3.547709  | -2.502231 | 1.040141  | 3.540638  | -2.498602 | 1.051656  |
| C | -4.598013 | -0.477637 | -0.007566 | 4.570185  | -0.505559 | 0.030886  | 4.571894  | -0.505296 | 0.045775  |
| C | -4.927013 | -2.900643 | -1.333470 | 4.828395  | -2.972869 | 1.329353  | 4.818174  | -2.967829 | 1.347570  |
| H | -2.778253 | -3.029054 | -1.409871 | 2.675953  | -3.042306 | 1.388262  | 2.665821  | -3.037386 | 1.393597  |
| C | -5.888916 | -0.934364 | -0.290914 | 5.844394  | -1.004608 | 0.316516  | 5.844174  | -1.004120 | 0.337284  |
| C | -6.048983 | -2.158070 | -0.937415 | 5.966974  | -2.243936 | 0.947624  | 5.961653  | -2.241952 | 0.970270  |
| H | -5.062883 | -3.824878 | -1.888988 | 4.940759  | -3.905098 | 1.875563  | 4.927402  | -3.898940 | 1.896438  |
| H | -6.753855 | -0.327120 | -0.037371 | 6.729217  | -0.420567 | 0.078530  | 6.730715  | -0.421879 | 0.101222  |
| H | -7.046182 | -2.521928 | -1.169421 | 6.954970  | -2.632512 | 1.180400  | 6.947352  | -2.632729 | 1.208244  |
| C | 2.155716  | 1.994380  | -0.349349 | -2.144526 | 2.019725  | 0.334781  | -2.146426 | 2.020364  | 0.337276  |
| C | 3.182268  | 2.838809  | -0.809253 | -3.176642 | 2.834812  | 0.813178  | -3.173767 | 2.844186  | 0.818555  |
| C | 0.839272  | 2.512835  | -0.128359 | -0.829812 | 2.545984  | 0.090980  | -0.832052 | 2.543588  | 0.085314  |
| C | 2.950566  | 4.196799  | -0.989069 | -2.979711 | 4.207900  | 0.973810  | -2.968619 | 4.212802  | 0.974303  |
| C | 0.659906  | 3.898041  | -0.336858 | -0.690902 | 3.944695  | 0.268508  | -0.684821 | 3.941830  | 0.260834  |
| C | 1.687509  | 4.741141  | -0.739166 | -1.734469 | 4.767279  | 0.679037  | -1.720956 | 4.769040  | 0.673321  |
| H | 3.758758  | 4.827479  | -1.351207 | -3.794851 | 4.825292  | 1.341438  | -3.777825 | 4.834872  | 1.347537  |
| H | -0.333853 | 4.314400  | -0.212724 | 0.287112  | 4.387192  | 0.113964  | 0.294487  | 4.379726  | 0.101155  |
| H | 1.504588  | 5.801674  | -0.889710 | -1.571372 | 5.835678  | 0.799759  | -1.553779 | 5.836701  | 0.793596  |
| C | 3.581957  | -0.126520 | -0.045257 | -3.557777 | -0.124578 | 0.046987  | -3.562112 | -0.120607 | 0.060377  |
| C | 4.918103  | 0.270128  | 0.070834  | -4.889766 | 0.261005  | -0.073366 | -4.895272 | 0.261718  | -0.046439 |
| C | 3.248709  | -1.506390 | 0.039982  | -3.222606 | -1.509691 | -0.027604 | -3.218308 | -1.506310 | -0.029738 |
| C | 5.896879  | -0.714191 | 0.200675  | -5.869926 | -0.735518 | -0.182924 | -5.872010 | -0.736720 | -0.158574 |
| C | 4.253203  | -2.471192 | 0.165713  | -4.225269 | -2.483998 | -0.133404 | -4.223156 | -2.484445 | -0.137447 |
| C | 5.594607  | -2.089265 | 0.231510  | -5.570303 | -2.109646 | -0.194148 | -5.565358 | -2.112697 | -0.185712 |
| H | 6.933646  | -0.398654 | 0.292223  | -6.907028 | -0.420979 | -0.271779 | -6.911248 | -0.426574 | -0.237064 |
| H | 3.984921  | -3.523336 | 0.224252  | -3.950449 | -3.534697 | -0.180739 | -3.945634 | -3.533868 | -0.194191 |
| H | 4.146398  | 2.434817  | -1.082138 | -4.125513 | 2.409198  | 1.108224  | -4.122283 | 2.423011  | 1.121074  |
| H | 5.214733  | 1.309507  | 0.105897  | -5.191966 | 1.297899  | -0.123158 | -5.202028 | 1.297937  | -0.082355 |
| C | 6.697468  | -3.114060 | 0.339084  | -6.671069 | -3.137759 | -0.277532 | -6.666538 | -3.139978 | -0.277437 |
| H | 7.417924  | -2.848588 | 1.121161  | -7.403761 | -2.879127 | -1.050006 | -7.361480 | -2.910769 | -1.093485 |
| H | 6.301147  | -4.107076 | 0.570911  | -6.274954 | -4.130793 | -0.508471 | -6.265152 | -4.142662 | -0.449971 |
| H | 7.259558  | -3.195030 | -0.600320 | -7.216941 | -3.212889 | 0.671612  | -7.256939 | -3.173937 | 0.646907  |



|                   |           |                      |           |           |                      |           |           |                      |           |
|-------------------|-----------|----------------------|-----------|-----------|----------------------|-----------|-----------|----------------------|-----------|
| C                 | -1.396555 | -3.447218            | 0.850582  | 1.388829  | -3.405402            | -0.963598 | 1.396086  | -3.407536            | -0.979642 |
| H                 | -2.302939 | -3.071871            | 1.328223  | 2.325502  | -3.014267            | -1.360479 | 2.330996  | -3.013582            | -1.379013 |
| H                 | -1.703477 | -4.162273            | 0.079402  | 1.636831  | -4.190564            | -0.240855 | 1.648139  | -4.183188            | -0.248536 |
| H                 | -0.841297 | -4.014428            | 1.604338  | 0.852991  | -3.891675            | -1.785131 | 0.865988  | -3.905254            | -1.797689 |
| <b>DMACTMCzBN</b> |           | <b>S<sub>0</sub></b> |           |           | <b>S<sub>1</sub></b> |           |           | <b>T<sub>1</sub></b> |           |
| C                 | 0.185115  | -2.235981            | -0.287575 | 0.196218  | -2.220052            | -0.332729 | 0.198798  | -2.219404            | -0.360674 |
| C                 | -1.184820 | -2.544391            | -0.317634 | -1.168086 | -2.555491            | -0.373569 | -1.157495 | -2.554359            | -0.401598 |
| C                 | -2.174832 | -1.569429            | -0.162469 | -2.153548 | -1.574110            | -0.197709 | -2.152255 | -1.566418            | -0.201503 |
| C                 | -1.747110 | -0.248161            | 0.016747  | -1.728960 | -0.233198            | -0.005605 | -1.732344 | -0.228275            | -0.000713 |
| C                 | -0.409790 | 0.137393             | 0.035427  | -0.406574 | 0.170502             | 0.008541  | -0.410181 | 0.182274             | -0.005871 |
| C                 | 0.568900  | -0.876403            | -0.076624 | 0.560204  | -0.847313            | -0.079003 | 0.564079  | -0.849246            | -0.099786 |
| H                 | -1.470451 | -3.576496            | -0.507029 | -1.447097 | -3.584195            | -0.581470 | -1.441496 | -3.576384            | -0.631619 |
| B                 | -0.102917 | 1.619675             | 0.001897  | -0.096959 | 1.668472             | 0.009883  | -0.108607 | 1.665541             | -0.007231 |
| N                 | -2.824537 | 0.618607             | 0.109830  | -2.807355 | 0.615996             | 0.122779  | -2.814209 | 0.619509             | 0.132254  |
| N                 | 1.913435  | -0.452207            | -0.041248 | 1.899887  | -0.410916            | 0.014731  | 1.898283  | -0.405045            | 0.018514  |
| C                 | -2.633483 | 1.971452             | 0.449124  | -2.629055 | 1.984982             | 0.473370  | -2.636562 | 1.986200             | 0.470577  |
| C                 | -3.701810 | 2.748891             | 0.931247  | -3.700658 | 2.727223             | 0.977171  | -3.706691 | 2.734362             | 0.977041  |
| C                 | -1.316188 | 2.531351             | 0.360385  | -1.311064 | 2.559754             | 0.348078  | -1.322386 | 2.561448             | 0.341425  |
| C                 | -3.506923 | 4.080043             | 1.279021  | -3.547991 | 4.081235             | 1.292244  | -3.547565 | 4.083848             | 1.290341  |
| C                 | -1.175624 | 3.883091             | 0.743703  | -1.219724 | 3.937623             | 0.685896  | -1.222699 | 3.934876             | 0.682510  |
| C                 | -2.240245 | 4.661728             | 1.179630  | -2.300755 | 4.689705             | 1.128378  | -2.299178 | 4.691603             | 1.126593  |
| H                 | -4.348375 | 4.656165             | 1.656118  | -4.396275 | 4.640560             | 1.677293  | -4.392621 | 4.645235             | 1.680125  |
| H                 | -0.183526 | 4.322027             | 0.732191  | -0.246219 | 4.414301             | 0.637818  | -0.247068 | 4.407306             | 0.632755  |
| H                 | -2.084837 | 5.698086             | 1.467255  | -2.167808 | 5.740888             | 1.374755  | -2.163451 | 5.741541             | 1.375576  |
| C                 | -3.994535 | -0.153520            | -0.082895 | -3.969877 | -0.161309            | -0.072850 | -3.972828 | -0.160919            | -0.063548 |
| C                 | -3.618426 | -1.519466            | -0.224269 | -3.588625 | -1.528464            | -0.236939 | -3.579799 | -1.527658            | -0.236039 |
| C                 | -5.335509 | 0.214000             | -0.233085 | -5.310725 | 0.194526             | -0.217811 | -5.316357 | 0.187943             | -0.200729 |
| C                 | -4.591239 | -2.500653            | -0.441380 | -4.556250 | -2.517391            | -0.458775 | -4.548169 | -2.522697            | -0.457689 |
| C                 | -6.280950 | -0.786599            | -0.453875 | -6.251578 | -0.815128            | -0.445892 | -6.251269 | -0.825143            | -0.429038 |
| C                 | -5.938950 | -2.149826            | -0.543326 | -5.907351 | -2.176747            | -0.549697 | -5.896889 | -2.187638            | -0.541111 |
| H                 | -4.292191 | -3.540973            | -0.545024 | -4.247429 | -3.553482            | -0.574498 | -4.235140 | -3.557069            | -0.576815 |
| H                 | -7.321542 | -0.493562            | -0.572876 | -7.294117 | -0.525470            | -0.556081 | -7.296344 | -0.542801            | -0.533642 |
| C                 | 2.283005  | 0.858753             | -0.435280 | 2.300396  | 0.896684             | -0.444753 | 2.298399  | 0.901572             | -0.430600 |
| C                 | 3.636172  | 1.050319             | -0.813499 | 3.642733  | 1.048307             | -0.828302 | 3.645818  | 1.055780             | -0.808805 |
| C                 | 1.347295  | 1.933568             | -0.436485 | 1.361494  | 1.974154             | -0.424424 | 1.358135  | 1.976356             | -0.427660 |
| C                 | 4.032678  | 2.330211             | -1.197511 | 4.071471  | 2.326936             | -1.234617 | 4.068101  | 2.329749             | -1.223587 |
| C                 | 1.808189  | 3.189954             | -0.884717 | 1.854364  | 3.219270             | -0.869553 | 1.846083  | 3.217112             | -0.880872 |
| C                 | 3.127818  | 3.396306             | -1.250288 | 3.180274  | 3.395643             | -1.260596 | 3.173011  | 3.395286             | -1.266367 |
| H                 | 5.059262  | 2.508772             | -1.496781 | 5.100335  | 2.490398             | -1.530421 | 5.097219  | 2.495625             | -1.517176 |
| H                 | 1.104391  | 4.012663             | -0.957871 | 1.178423  | 4.066445             | -0.914182 | 1.166123  | 4.060236             | -0.940231 |
| H                 | 3.463585  | 4.373693             | -1.587211 | 3.525876  | 4.375204             | -1.583709 | 3.516696  | 4.371984             | -1.599545 |
| C                 | 2.893526  | -1.146983            | 0.723270  | 2.847281  | -1.122019            | 0.755935  | 2.847373  | -1.126399            | 0.757093  |
| C                 | 4.247614  | -1.012141            | 0.361663  | 4.216004  | -1.003541            | 0.402866  | 4.214469  | -1.010250            | 0.408834  |
| C                 | 2.530890  | -1.856981            | 1.876215  | 2.454814  | -1.874871            | 1.882896  | 2.446305  | -1.882567            | 1.876051  |
| C                 | 5.206707  | -1.642859            | 1.162260  | 5.145964  | -1.688888            | 1.188206  | 5.139357  | -1.709687            | 1.188791  |
| C                 | 3.504615  | -2.486901            | 2.647212  | 3.405226  | -2.543768            | 2.639012  | 3.391315  | -2.561442            | 2.631281  |

|                |           |                      |           |           |                      |           |           |                      |           |
|----------------|-----------|----------------------|-----------|-----------|----------------------|-----------|-----------|----------------------|-----------|
| H              | 1.488688  | -1.901242            | 2.173217  | 1.409774  | -1.891112            | 2.171878  | 1.399248  | -1.897508            | 2.157236  |
| C              | 4.847548  | -2.386802            | 2.287292  | 4.756518  | -2.458172            | 2.288047  | 4.742849  | -2.483856            | 2.282069  |
| H              | 6.258119  | -1.556721            | 0.912407  | 6.201323  | -1.630755            | 0.948818  | 6.195526  | -1.655866            | 0.952311  |
| H              | 3.210169  | -3.036765            | 3.537385  | 3.097773  | -3.107456            | 3.515519  | 3.078109  | -3.129309            | 3.502929  |
| H              | 5.616223  | -2.870683            | 2.883893  | 5.509607  | -2.973840            | 2.877525  | 5.491614  | -3.009242            | 2.868406  |
| C              | 4.572151  | -0.165558            | -0.871500 | 4.572042  | -0.171968            | -0.829629 | 4.580487  | -0.160912            | -0.808723 |
| C              | 6.055762  | 0.234996             | -0.919955 | 6.060204  | 0.220420             | -0.837208 | 6.066507  | 0.239797             | -0.792756 |
| H              | 6.272024  | 0.818694             | -1.818368 | 6.303230  | 0.795468             | -1.733557 | 6.319823  | 0.823895             | -1.680253 |
| H              | 6.353241  | 0.822375             | -0.045718 | 6.332581  | 0.814994             | 0.040047  | 6.323599  | 0.826964             | 0.094017  |
| H              | 6.691369  | -0.653106            | -0.971469 | 6.694230  | -0.669798            | -0.863843 | 6.705231  | -0.646827            | -0.819198 |
| C              | 4.263352  | -0.972860            | -2.164293 | 4.303350  | -1.003746            | -2.119168 | 4.330526  | -0.977628            | -2.111276 |
| H              | 4.497164  | -0.367844            | -3.046771 | 4.570598  | -0.412903            | -3.001199 | 4.604895  | -0.375717            | -2.983548 |
| H              | 4.873170  | -1.882296            | -2.197736 | 4.906100  | -1.918582            | -2.119060 | 4.938335  | -1.888887            | -2.113875 |
| H              | 3.212484  | -1.261060            | -2.226065 | 3.251423  | -1.280601            | -2.212700 | 3.281563  | -1.260020            | -2.220253 |
| H              | -4.674354 | 2.307168             | 1.093035  | -4.654062 | 2.255276             | 1.170191  | -4.660040 | 2.264600             | 1.175588  |
| H              | -5.658059 | 1.246516             | -0.228116 | -5.641117 | 1.224116             | -0.197994 | -5.653315 | 1.215349             | -0.173098 |
| C              | 1.158909  | -3.355463            | -0.570624 | 1.181357  | -3.320192            | -0.644516 | 1.189643  | -3.315494            | -0.676901 |
| H              | 2.005517  | -3.019139            | -1.173658 | 2.098850  | -2.947877            | -1.101994 | 2.089135  | -2.941661            | -1.168526 |
| H              | 1.575524  | -3.795525            | 0.342292  | 1.474722  | -3.877847            | 0.252192  | 1.514593  | -3.851983            | 0.221218  |
| H              | 0.655073  | -4.155049            | -1.121809 | 0.726248  | -4.034506            | -1.337055 | 0.724358  | -4.047408            | -1.343483 |
| C              | -7.007714 | -3.195450            | -0.750334 | -6.972048 | -3.224735            | -0.761715 | -6.959765 | -3.235999            | -0.761091 |
| H              | -7.709441 | -2.902469            | -1.539589 | -7.665271 | -2.937430            | -1.560542 | -7.595149 | -2.989509            | -1.620126 |
| H              | -6.575465 | -4.161628            | -1.027202 | -6.534954 | -4.191432            | -1.028626 | -6.519263 | -4.220690            | -0.942597 |
| H              | -7.598057 | -3.348556            | 0.162482  | -7.571930 | -3.373449            | 0.145427  | -7.620628 | -3.324101            | 0.110589  |
| <b>2TMCzBN</b> |           | <b>S<sub>0</sub></b> |           |           | <b>S<sub>1</sub></b> |           |           | <b>T<sub>1</sub></b> |           |
| C              | -2.196572 | -1.656887            | -0.117958 | -2.182785 | -1.656296            | -0.135567 | -2.184223 | -1.649295            | -0.144567 |
| C              | -1.251975 | -2.640364            | -0.409518 | -1.246608 | -2.658300            | -0.434069 | -1.242981 | -2.655972            | -0.466095 |
| C              | 0.126388  | -2.368128            | -0.461902 | 0.118392  | -2.361939            | -0.505443 | 0.117505  | -2.359478            | -0.532491 |
| C              | 0.562388  | -1.053146            | -0.132139 | 0.555120  | -1.023064            | -0.158486 | 0.555686  | -1.028134            | -0.174437 |
| C              | -0.377033 | 0.003353             | 0.041661  | -0.372885 | 0.041951             | -0.023648 | -0.376740 | 0.050982             | -0.036861 |
| C              | -1.725228 | -0.348387            | 0.072308  | -1.707543 | -0.325387            | 0.031498  | -1.711297 | -0.320161            | 0.032237  |
| H              | -1.582690 | -3.642547            | -0.672732 | -1.580999 | -3.653704            | -0.711333 | -1.583309 | -3.641615            | -0.768151 |
| B              | -0.054873 | 1.493127             | -0.052328 | -0.039997 | 1.543616             | -0.079024 | -0.050725 | 1.537132             | -0.094370 |
| N              | 1.906195  | -0.643317            | -0.073419 | 1.888323  | -0.631125            | -0.065379 | 1.889516  | -0.628348            | -0.068621 |
| N              | -2.781646 | 0.538724             | 0.214033  | -2.760229 | 0.549592             | 0.197706  | -2.764553 | 0.553159             | 0.208261  |
| C              | 2.269711  | 0.676013             | -0.354353 | 2.288300  | 0.710192             | -0.343071 | 2.287668  | 0.706741             | -0.344341 |
| C              | 3.678387  | 0.773316             | -0.427005 | 3.686934  | 0.765587             | -0.407647 | 3.690176  | 0.766431             | -0.400870 |
| C              | 1.408991  | 1.784269             | -0.467269 | 1.431945  | 1.826228             | -0.443234 | 1.434942  | 1.824260             | -0.452664 |
| C              | 4.250859  | 1.993202             | -0.775827 | 4.308286  | 1.988922             | -0.727072 | 4.306207  | 1.986014             | -0.722621 |
| C              | 2.045775  | 2.990129             | -0.837950 | 2.108425  | 3.026965             | -0.793958 | 2.105304  | 3.019635             | -0.802968 |
| C              | 3.430653  | 3.110730             | -1.018921 | 3.505350  | 3.115286             | -0.949378 | 3.503642  | 3.111327             | -0.956173 |
| H              | 5.331350  | 2.088932             | -0.858572 | 5.390198  | 2.061304             | -0.795144 | 5.388434  | 2.061890             | -0.784621 |
| H              | 1.436574  | 3.875998             | -0.992461 | 1.524274  | 3.929241             | -0.948314 | 1.520951  | 3.921618             | -0.958038 |
| C              | 3.087689  | -1.347868            | 0.242418  | 3.040727  | -1.356106            | 0.249164  | 3.041970  | -1.351887            | 0.253634  |
| C              | 3.268403  | -2.578044            | 0.877259  | 3.186430  | -2.597368            | 0.879481  | 3.183585  | -2.594980            | 0.881383  |
| C              | 4.203417  | -0.516864            | -0.027621 | 4.177180  | -0.536769            | -0.012640 | 4.180554  | -0.536112            | -0.002792 |

|   |           |           |           |           |           |           |           |           |           |
|---|-----------|-----------|-----------|-----------|-----------|-----------|-----------|-----------|-----------|
| C | 4.570200  | -3.008873 | 1.126714  | 4.471683  | -3.065469 | 1.132152  | 4.466882  | -3.062101 | 1.139952  |
| H | 2.428197  | -3.173994 | 1.208478  | 2.326264  | -3.169658 | 1.203998  | 2.321114  | -3.167621 | 1.198695  |
| C | 5.499458  | -0.977784 | 0.222436  | 5.455372  | -1.038647 | 0.236339  | 5.458196  | -1.037575 | 0.250940  |
| C | 5.701301  | -2.241834 | 0.783473  | 5.620275  | -2.315862 | 0.792099  | 5.619230  | -2.313806 | 0.806154  |
| H | 4.712097  | -3.966803 | 1.621933  | 4.591905  | -4.026360 | 1.625806  | 4.584432  | -4.023398 | 1.633630  |
| H | 6.352051  | -0.337763 | 0.008282  | 6.328897  | -0.426437 | 0.027273  | 6.332632  | -0.425536 | 0.045042  |
| C | -2.556546 | 1.896722  | 0.500862  | -2.545002 | 1.924206  | 0.487772  | -2.547959 | 1.923742  | 0.489914  |
| C | -3.584441 | 2.704822  | 1.019419  | -3.575573 | 2.705588  | 1.022313  | -3.575277 | 2.711439  | 1.027884  |
| C | -1.242464 | 2.433010  | 0.311575  | -1.232491 | 2.468619  | 0.270078  | -1.236541 | 2.467129  | 0.266382  |
| C | -3.356486 | 4.048295  | 1.290307  | -3.380585 | 4.066276  | 1.268460  | -3.374014 | 4.068185  | 1.271103  |
| C | -1.066750 | 3.801286  | 0.613451  | -1.095632 | 3.854754  | 0.535248  | -1.092978 | 3.851829  | 0.531924  |
| C | -2.095643 | 4.612050  | 1.074972  | -2.137815 | 4.646662  | 1.003324  | -2.129542 | 4.647140  | 1.002097  |
| H | -0.074467 | 4.227897  | 0.515295  | -0.119242 | 4.308297  | 0.403785  | -0.115580 | 4.302241  | 0.397060  |
| C | -3.976753 | -0.204264 | 0.063291  | -3.952019 | -0.199951 | 0.066740  | -3.956008 | -0.198590 | 0.078591  |
| C | -5.314452 | 0.194781  | -0.024404 | -5.287220 | 0.188024  | -0.021441 | -5.292383 | 0.185379  | 0.001747  |
| C | -3.639507 | -1.574973 | -0.110062 | -3.612904 | -1.576598 | -0.099956 | -3.608533 | -1.574293 | -0.101168 |
| C | -6.290714 | -0.782105 | -0.214683 | -6.263220 | -0.801391 | -0.193547 | -6.265291 | -0.805803 | -0.172040 |
| C | -4.641770 | -2.532824 | -0.294559 | -4.613488 | -2.544962 | -0.266105 | -4.610500 | -2.546107 | -0.268638 |
| C | -5.984354 | -2.151569 | -0.333167 | -5.958672 | -2.171841 | -0.297239 | -5.953749 | -2.176496 | -0.288952 |
| C | 4.045813  | 4.420556  | -1.452027 | 4.133784  | 4.428819  | -1.350994 | 4.130868  | 4.423207  | -1.361692 |
| H | 4.359405  | 4.385109  | -2.503565 | 4.003448  | 4.617835  | -2.424987 | 4.010348  | 4.601164  | -2.438662 |
| H | 3.339119  | 5.249410  | -1.349520 | 3.676379  | 5.271832  | -0.821057 | 3.664025  | 5.268658  | -0.844438 |
| H | 4.935805  | 4.662757  | -0.860191 | 5.208382  | 4.442732  | -1.144087 | 5.203178  | 4.443140  | -1.144424 |
| C | 7.091553  | -2.771359 | 1.038723  | 6.994334  | -2.878221 | 1.047822  | 6.991012  | -2.878438 | 1.071746  |
| H | 7.373592  | -3.526656 | 0.293357  | 7.234759  | -3.674363 | 0.330382  | 7.220989  | -3.699800 | 0.380275  |
| H | 7.839277  | -1.973769 | 0.994636  | 7.768107  | -2.110430 | 0.959053  | 7.769687  | -2.119651 | 0.953553  |
| H | 7.166196  | -3.248805 | 2.022181  | 7.066634  | -3.320522 | 2.048150  | 7.066237  | -3.286957 | 2.086218  |
| H | -4.370777 | -3.578360 | -0.420444 | -4.335781 | -3.589490 | -0.383478 | -4.330201 | -3.588943 | -0.393898 |
| C | 1.008171  | -3.449247 | -1.051331 | 1.005328  | -3.406312 | -1.143792 | 1.011771  | -3.404384 | -1.163243 |
| H | 1.909898  | -3.042652 | -1.511918 | 1.939237  | -2.992775 | -1.524932 | 1.945231  | -2.988815 | -1.543910 |
| H | 1.323136  | -4.205831 | -0.324221 | 1.259212  | -4.224605 | -0.460881 | 1.266507  | -4.218002 | -0.475475 |
| H | 0.450903  | -3.975200 | -1.833014 | 0.469373  | -3.854820 | -1.986430 | 0.480573  | -3.858601 | -2.005577 |
| H | -1.915287 | 5.660489  | 1.296752  | -1.976422 | 5.705664  | 1.191154  | -1.965102 | 5.705321  | 1.190918  |
| H | -4.165643 | 4.650399  | 1.696325  | -4.195054 | 4.657116  | 1.678934  | -4.183882 | 4.661810  | 1.686956  |
| H | -7.328611 | -0.464528 | -0.283973 | -7.302002 | -0.486011 | -0.257860 | -7.305976 | -0.495264 | -0.227762 |
| H | -4.546577 | 2.280164  | 1.266872  | -4.522112 | 2.259778  | 1.294394  | -4.521279 | 2.268248  | 1.305983  |
| H | -5.614062 | 1.233465  | 0.006857  | -5.592655 | 1.224997  | 0.000037  | -5.602010 | 1.220922  | 0.034260  |
| C | -7.084806 | -3.170535 | -0.503154 | -7.057580 | -3.194687 | -0.446573 | -7.052107 | -3.199329 | -0.444120 |
| H | -6.686087 | -4.146695 | -0.794685 | -6.657345 | -4.175423 | -0.719375 | -6.647770 | -4.188794 | -0.676230 |
| H | -7.646990 | -3.309617 | 0.429406  | -7.618463 | -3.315686 | 0.489001  | -7.644147 | -3.290870 | 0.475332  |
| H | -7.805863 | -2.859753 | -1.267851 | -7.778724 | -2.899312 | -1.217048 | -7.746656 | -2.923469 | -1.246098 |

---

**Table S4.** Values of the dihedral angle ( $\alpha_L$ ), the dihedral angle ( $\alpha_R$ ) and the dihedral angle ( $\alpha_A$ ) of the studied 36 molecules by O3LYP/6-31G(d) in toluene.

| Compound         | State          | $\alpha_L(^{\circ})$ | $\alpha_R(^{\circ})$ | $\alpha_A(^{\circ})$ | Compound          | State          | $\alpha_L(^{\circ})$ | $\alpha_R(^{\circ})$ | $\alpha_A(^{\circ})$ |
|------------------|----------------|----------------------|----------------------|----------------------|-------------------|----------------|----------------------|----------------------|----------------------|
| <b>2PXZBN</b>    | S <sub>0</sub> | 28.34                | 26.20                | 36.22                | <b>PXZCzBN</b>    | S <sub>0</sub> | 27.53                | 13.56                | 30.20                |
|                  | S <sub>1</sub> | 30.50                | 24.03                | 34.59                |                   | S <sub>1</sub> | 24.48                | 10.63                | 29.26                |
|                  | T <sub>1</sub> | 30.05                | 24.45                | 34.74                |                   | T <sub>1</sub> | 24.92                | 10.22                | 28.98                |
| <b>PTZPXZBN</b>  | S <sub>0</sub> | 33.67                | 26.80                | 36.92                | <b>PTZCzBN</b>    | S <sub>0</sub> | 33.51                | 14.76                | 30.86                |
|                  | S <sub>1</sub> | 35.50                | 24.72                | 35.13                |                   | S <sub>1</sub> | 27.85                | 10.66                | 31.15                |
|                  | T <sub>1</sub> | 35.25                | 25.01                | 35.25                |                   | T <sub>1</sub> | 30.00                | 10.67                | 30.68                |
| <b>DPAPXZBN</b>  | S <sub>0</sub> | 91.49                | 28.65                | 30.66                | <b>DPACzBN</b>    | S <sub>0</sub> | 89.72                | 15.93                | 23.14                |
|                  | S <sub>1</sub> | 92.23                | 25.73                | 28.26                |                   | S <sub>1</sub> | 88.74                | 15.18                | 18.12                |
|                  | T <sub>1</sub> | 92.19                | 26.88                | 28.49                |                   | T <sub>1</sub> | 88.74                | 15.06                | 19.52                |
| <b>CzPXZBN</b>   | S <sub>0</sub> | 15.38                | 26.24                | 28.46                | <b>2CzBN</b>      | S <sub>0</sub> | 14.08                | 12.51                | 21.54                |
|                  | S <sub>1</sub> | 16.81                | 24.11                | 27.92                |                   | S <sub>1</sub> | 15.58                | 5.36                 | 18.83                |
|                  | T <sub>1</sub> | 16.55                | 24.44                | 27.44                |                   | T <sub>1</sub> | 15.35                | 11.67                | 19.10                |
| <b>DMACPXZBN</b> | S <sub>0</sub> | 32.77                | 26.66                | 34.94                | <b>DMACCzBN</b>   | S <sub>0</sub> | 32.41                | 14.69                | 28.69                |
|                  | S <sub>1</sub> | 34.90                | 24.68                | 33.22                |                   | S <sub>1</sub> | 31.13                | 13.09                | 25.82                |
|                  | T <sub>1</sub> | 34.68                | 25.12                | 33.25                |                   | T <sub>1</sub> | 32.10                | 12.26                | 26.61                |
| <b>TMCzPXZBN</b> | S <sub>0</sub> | 15.23                | 26.41                | 28.22                | <b>TMCzCzBN</b>   | S <sub>0</sub> | 14.08                | 12.73                | 21.32                |
|                  | S <sub>1</sub> | 16.61                | 24.21                | 27.46                |                   | S <sub>1</sub> | 15.26                | 12.19                | 18.58                |
|                  | T <sub>1</sub> | 16.26                | 24.60                | 27.05                |                   | T <sub>1</sub> | 15.06                | 11.68                | 18.88                |
| <b>PXZPTZBN</b>  | S <sub>0</sub> | 28.89                | 31.74                | 36.70                | <b>PXZDMACBN</b>  | S <sub>0</sub> | 28.28                | 30.77                | 36.20                |
|                  | S <sub>1</sub> | 31.18                | 29.01                | 36.59                |                   | S <sub>1</sub> | 27.27                | 29.32                | 34.65                |
|                  | T <sub>1</sub> | 30.47                | 29.85                | 36.39                |                   | T <sub>1</sub> | 26.96                | 28.98                | 34.40                |
| <b>2PTZBN</b>    | S <sub>0</sub> | 34.40                | 32.09                | 37.37                | <b>PTZDMACBN</b>  | S <sub>0</sub> | 33.82                | 31.16                | 36.89                |
|                  | S <sub>1</sub> | 36.06                | 29.15                | 37.18                |                   | S <sub>1</sub> | 31.39                | 29.25                | 35.76                |
|                  | T <sub>1</sub> | 35.81                | 30.05                | 29.61                |                   | T <sub>1</sub> | 32.43                | 29.51                | 35.48                |
| <b>DPAPTZBN</b>  | S <sub>0</sub> | 91.49                | 33.28                | 30.88                | <b>DPADMACBN</b>  | S <sub>0</sub> | 91.20                | 32.68                | 30.42                |
|                  | S <sub>1</sub> | 92.73                | 30.01                | 30.58                |                   | S <sub>1</sub> | 91.85                | 32.24                | 27.31                |
|                  | T <sub>1</sub> | 92.74                | 31.45                | 30.55                |                   | T <sub>1</sub> | 91.97                | 33.33                | 27.06                |
| <b>CzPTZBN</b>   | S <sub>0</sub> | 15.46                | 32.33                | 28.88                | <b>CzDMACBN</b>   | S <sub>0</sub> | 15.05                | 31.23                | 11.38                |
|                  | S <sub>1</sub> | 17.09                | 29.05                | 29.93                |                   | S <sub>1</sub> | 15.76                | 31.15                | 27.56                |
|                  | T <sub>1</sub> | 16.85                | 30.06                | 29.44                |                   | T <sub>1</sub> | 15.60                | 31.98                | 26.54                |
| <b>DMACPTZBN</b> | S <sub>0</sub> | 33.42                | 31.84                | 35.34                | <b>2DMACBN</b>    | S <sub>0</sub> | 32.87                | 31.01                | 34.91                |
|                  | S <sub>1</sub> | 35.32                | 29.09                | 35.37                |                   | S <sub>1</sub> | 32.87                | 30.70                | 32.57                |
|                  | T <sub>1</sub> | 35.15                | 30.05                | 35.23                |                   | T <sub>1</sub> | 33.34                | 31.14                | 32.25                |
| <b>TMCzPTZBN</b> | S <sub>0</sub> | 15.26                | 32.37                | 28.68                | <b>TMCzDMACBN</b> | S <sub>0</sub> | 14.89                | 31.38                | 28.16                |
|                  | S <sub>1</sub> | 16.86                | 29.27                | 29.48                |                   | S <sub>1</sub> | 15.63                | 31.40                | 26.95                |
|                  | T <sub>1</sub> | 16.61                | 30.30                | 29.09                |                   | T <sub>1</sub> | 15.41                | 32.12                | 26.10                |
| <b>PXZDPABN</b>  | S <sub>0</sub> | 28.96                | 90.08                | 30.48                | <b>PXZTMCzBN</b>  | S <sub>0</sub> | 24.04                | 11.48                | 30.04                |
|                  | S <sub>1</sub> | 26.54                | 92.02                | 28.19                |                   | S <sub>1</sub> | 22.83                | 3.88                 | 29.15                |
|                  | T <sub>1</sub> | 26.51                | 92.18                | 27.75                |                   | T <sub>1</sub> | 11.34                | 8.72                 | 29.13                |
| <b>PTZDPABN</b>  | S <sub>0</sub> | 34.07                | 89.40                | 31.35                | <b>PTZTMCzBN</b>  | S <sub>0</sub> | 29.45                | 12.56                | 31.57                |
|                  | S <sub>1</sub> | 30.01                | 91.68                | 29.87                |                   | S <sub>1</sub> | 25.38                | 9.06                 | 31.54                |
|                  | T <sub>1</sub> | 31.57                | 91.56                | 29.25                |                   | T <sub>1</sub> | 28.66                | 9.51                 | 31.17                |
| <b>2DPABN</b>    | S <sub>0</sub> | 89.15                | 87.79                | 24.79                | <b>DPATMCzBN</b>  | S <sub>0</sub> | 67.67                | 14.47                | 11.19                |
|                  | S <sub>1</sub> | 89.59                | 87.81                | 19.43                |                   | S <sub>1</sub> | 61.12                | 15.46                | 24.65                |
|                  | T <sub>1</sub> | 89.53                | 87.90                | 19.78                |                   | T <sub>1</sub> | 63.14                | 13.69                | 25.79                |
| <b>CzDPABN</b>   | S <sub>0</sub> | 16.54                | 89.29                | 21.44                | <b>CzTMCzBN</b>   | S <sub>0</sub> | 16.14                | 9.39                 | 21.67                |
|                  | S <sub>1</sub> | 17.11                | 88.77                | 18.11                |                   | S <sub>1</sub> | 17.84                | 11.47                | 19.01                |
|                  | T <sub>1</sub> | 16.45                | 88.50                | 17.66                |                   | T <sub>1</sub> | 17.96                | 10.29                | 19.15                |
| <b>DMACDPABN</b> | S <sub>0</sub> | 33.25                | 89.49                | 29.48                | <b>DMACTMCzBN</b> | S <sub>0</sub> | 28.29                | 13.06                | 29.51                |
|                  | S <sub>1</sub> | 32.36                | 90.21                | 25.75                |                   | S <sub>1</sub> | 29.60                | 12.93                | 26.79                |
|                  | T <sub>1</sub> | 32.67                | 90.53                | 25.59                |                   | T <sub>1</sub> | 30.83                | 11.86                | 27.50                |
| <b>TMCzDPABN</b> | S <sub>0</sub> | 16.49                | 89.55                | 8.78                 | <b>2TMCzBN</b>    | S <sub>0</sub> | 16.26                | 9.70                 | 21.60                |
|                  | S <sub>1</sub> | 16.91                | 88.90                | 17.76                |                   | S <sub>1</sub> | 17.84                | 11.14                | 19.04                |
|                  | T <sub>1</sub> | 16.33                | 88.61                | 17.63                |                   | T <sub>1</sub> | 17.88                | 10.21                | 19.17                |

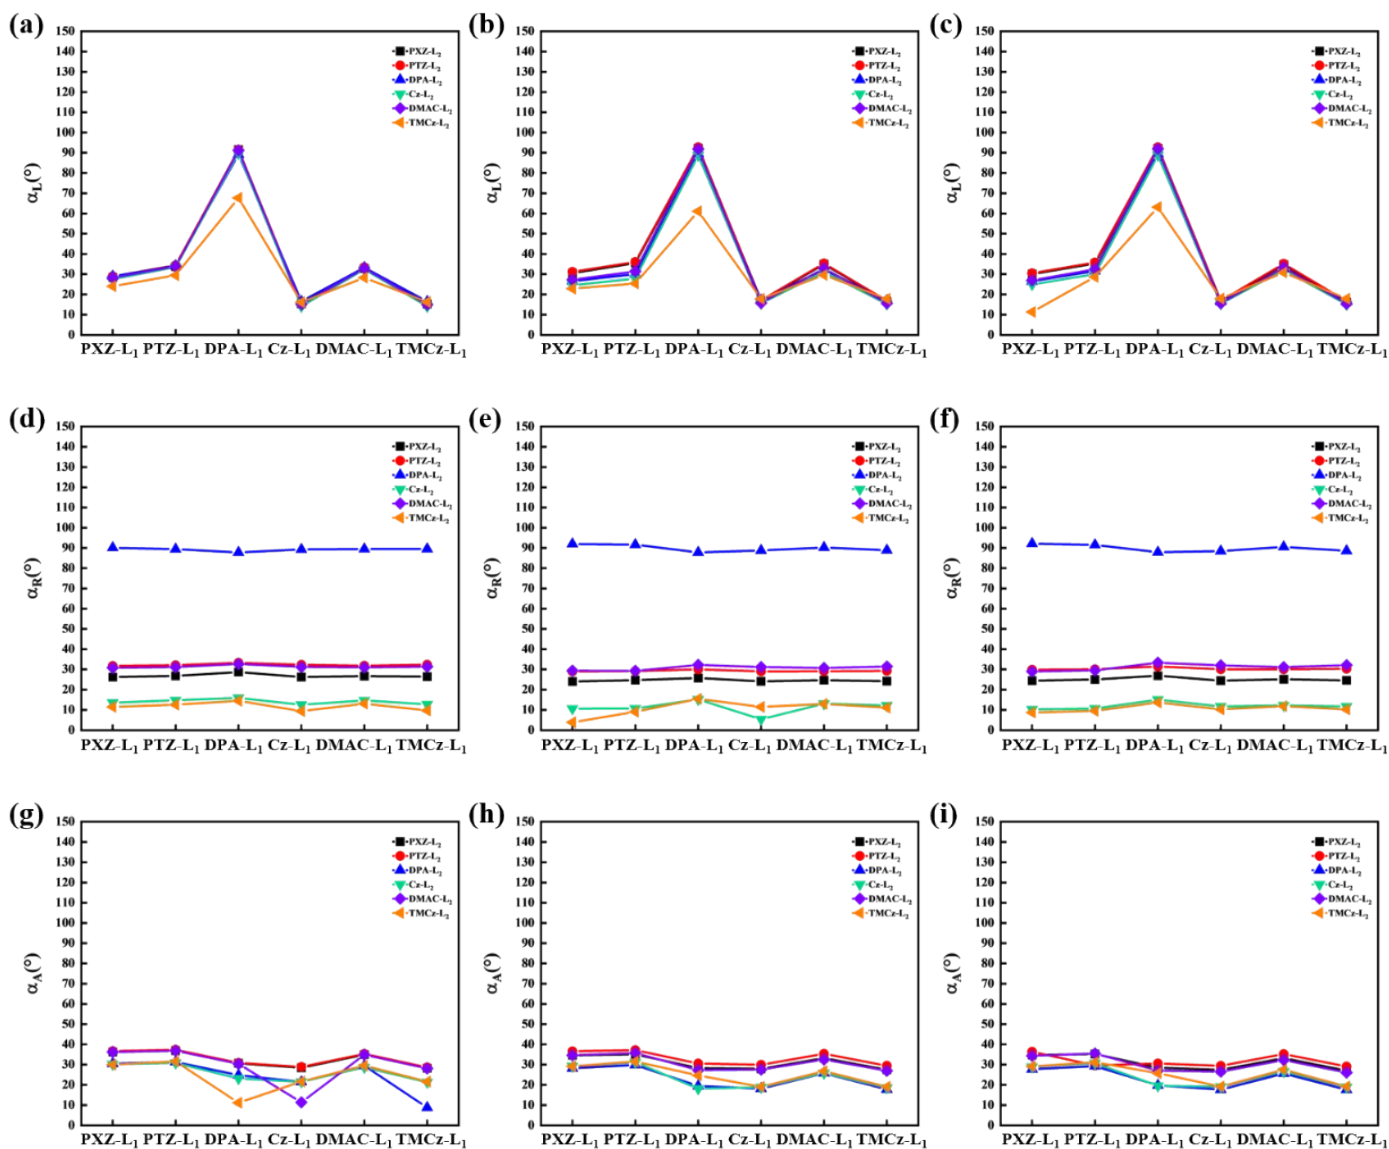

**Fig. S3.** Dihedral angle ( $\alpha_L$ ) (a-c), the dihedral angle ( $\alpha_R$ ) (d-f), and the dihedral angle ( $\alpha_A$ ) (g-i) of molecules in S<sub>0</sub>, S<sub>1</sub> and T<sub>1</sub> by O3LYP/6-31G(d) in toluene.

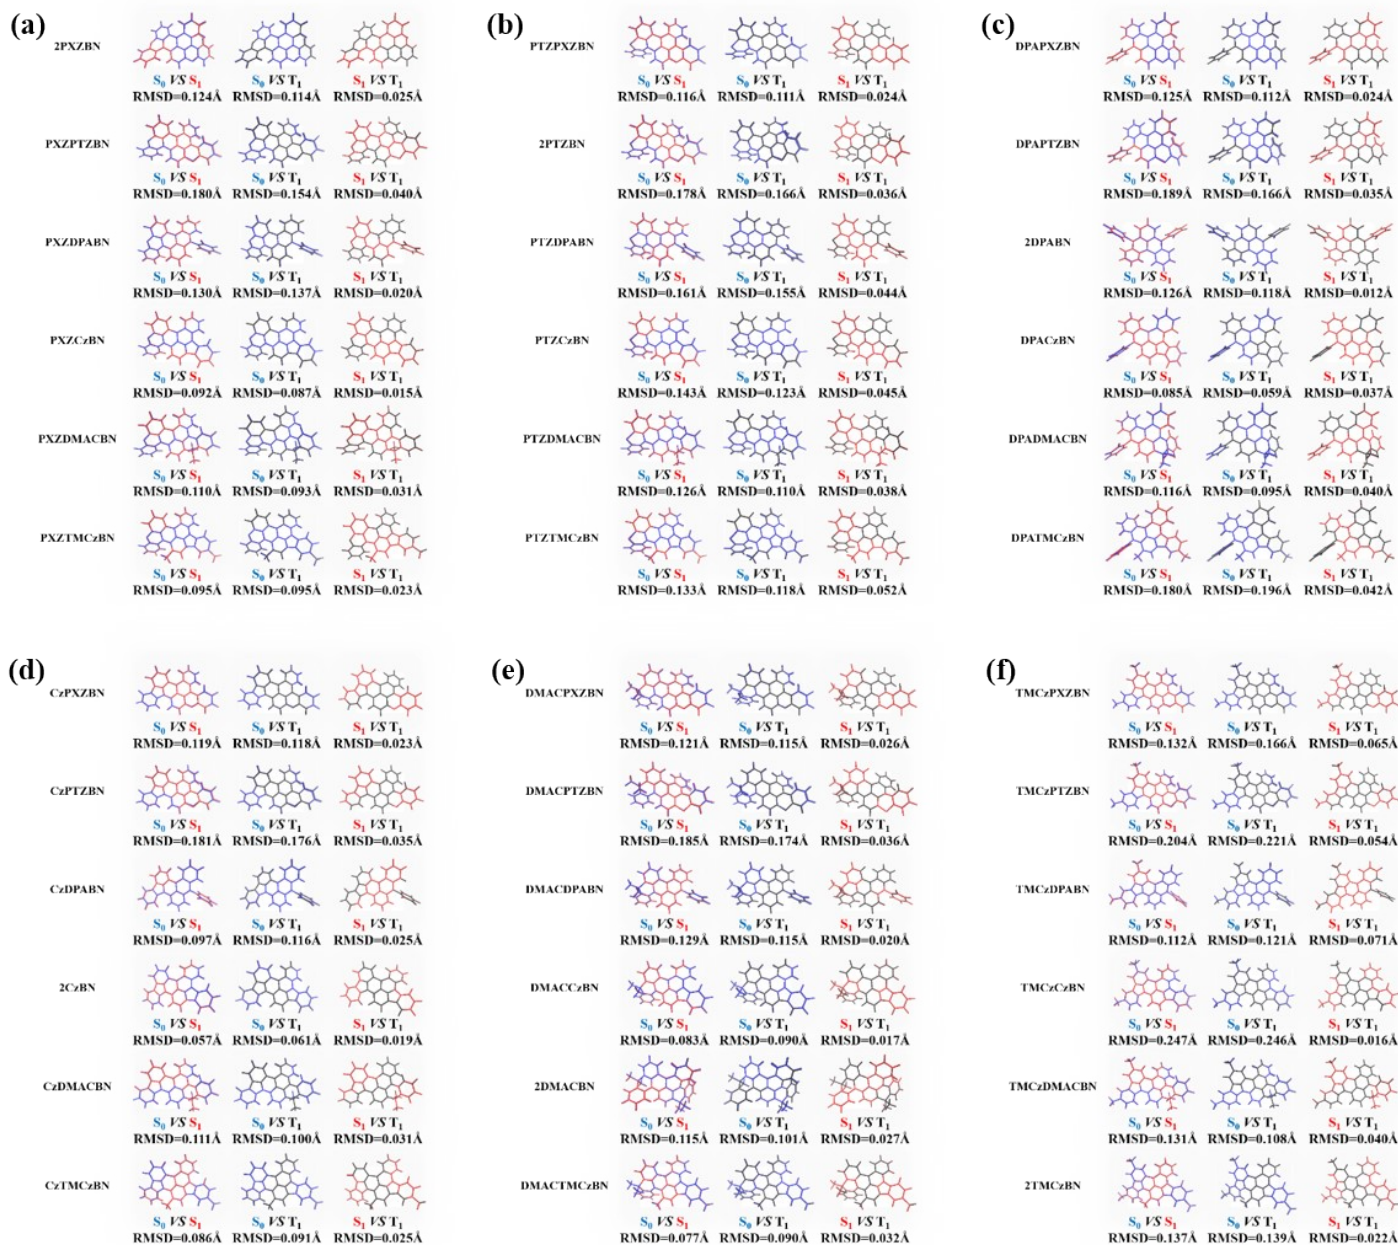

**Fig. S4.** Root mean square displacement (RMSD) for  $S_0$ - $S_1$ ,  $S_0$ - $T_1$  or  $S_1$ - $T_1$  of all studied molecules by O3LYP/6-31G(d) in toluene.

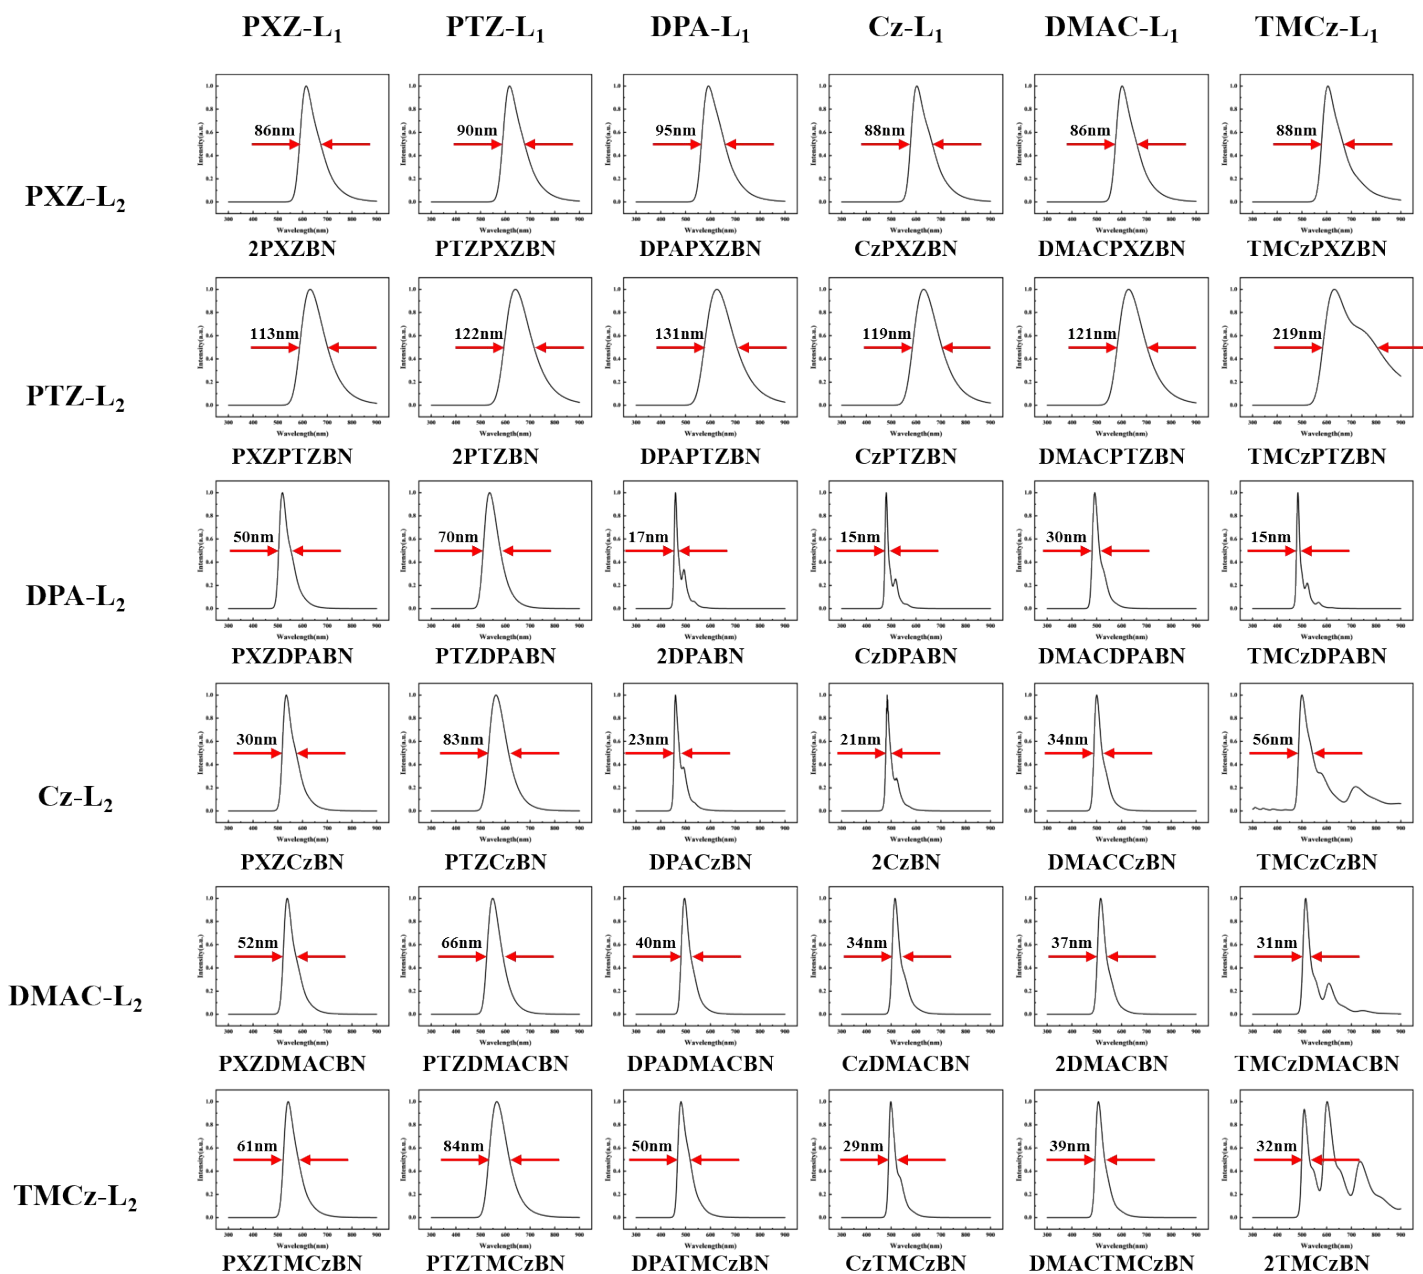

**Fig. S5.** Full width at half maximum (FWHM) of emission wavelength for all studied molecules by O3LYP/6-31G(d) in toluene.



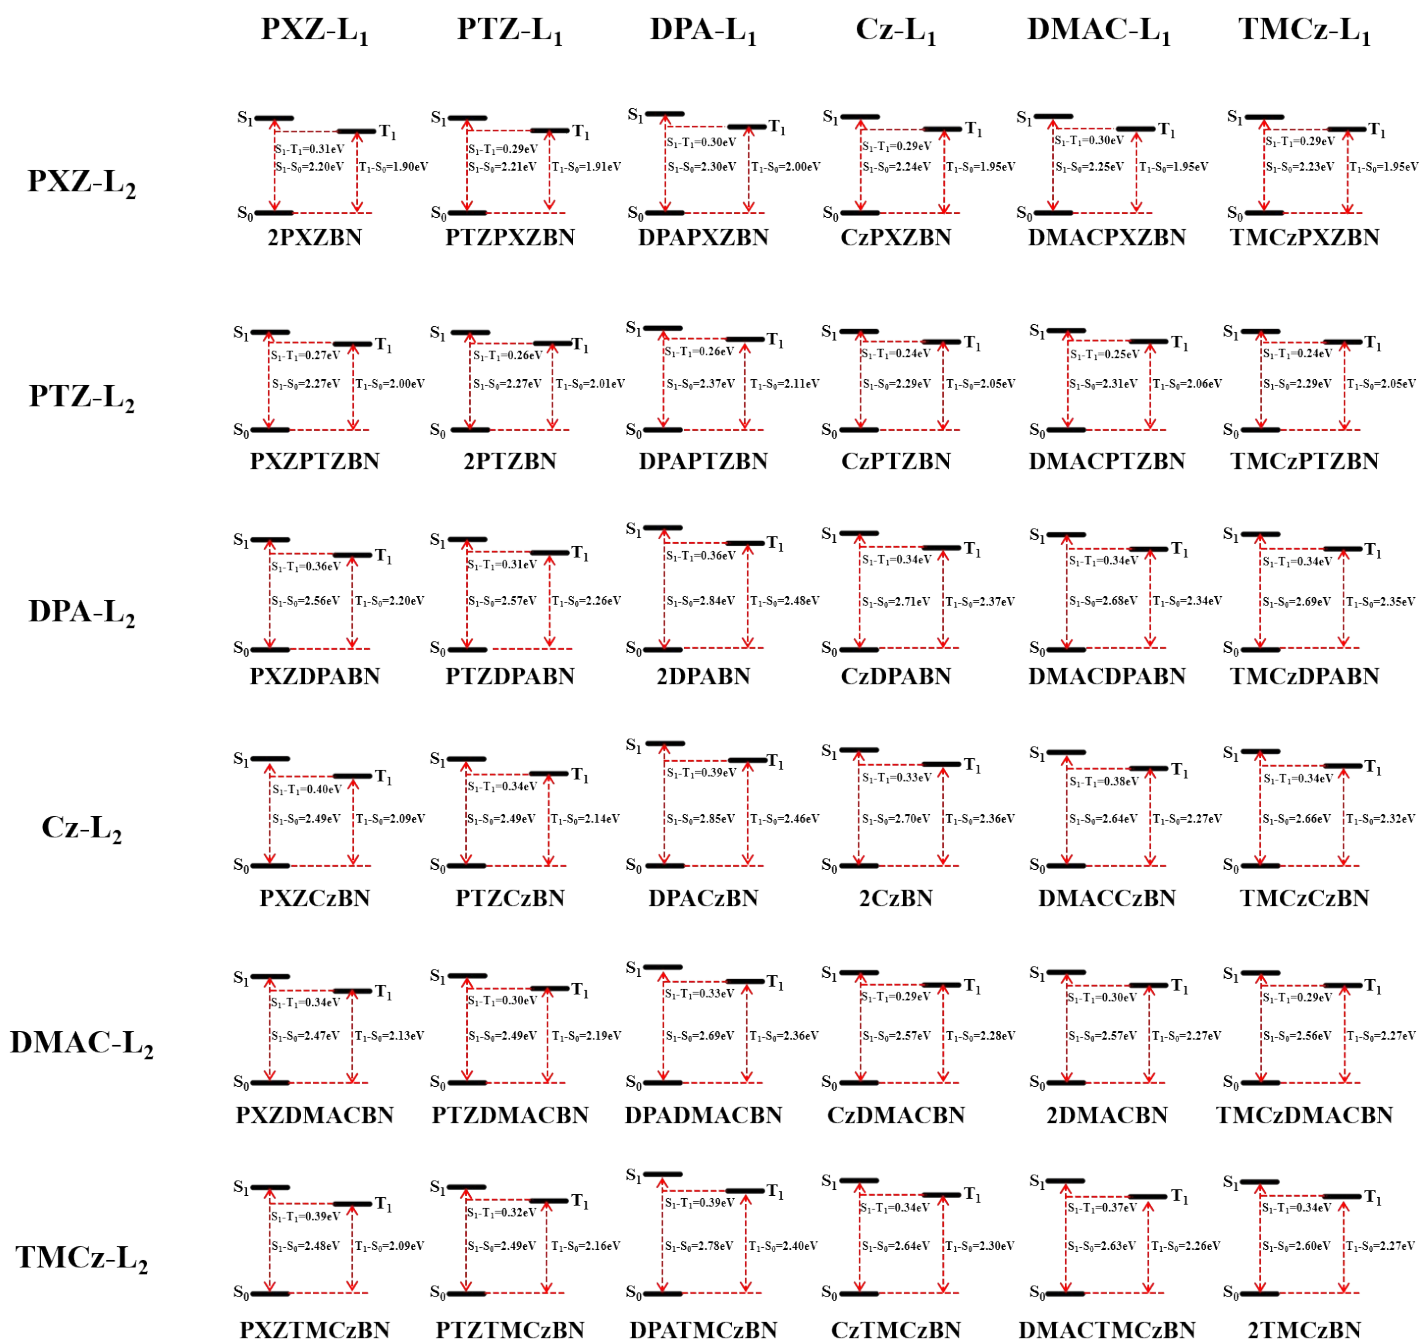

Fig. S6. Energy levels for all studied molecules by O3LYP/6-31G(d) in toluene.



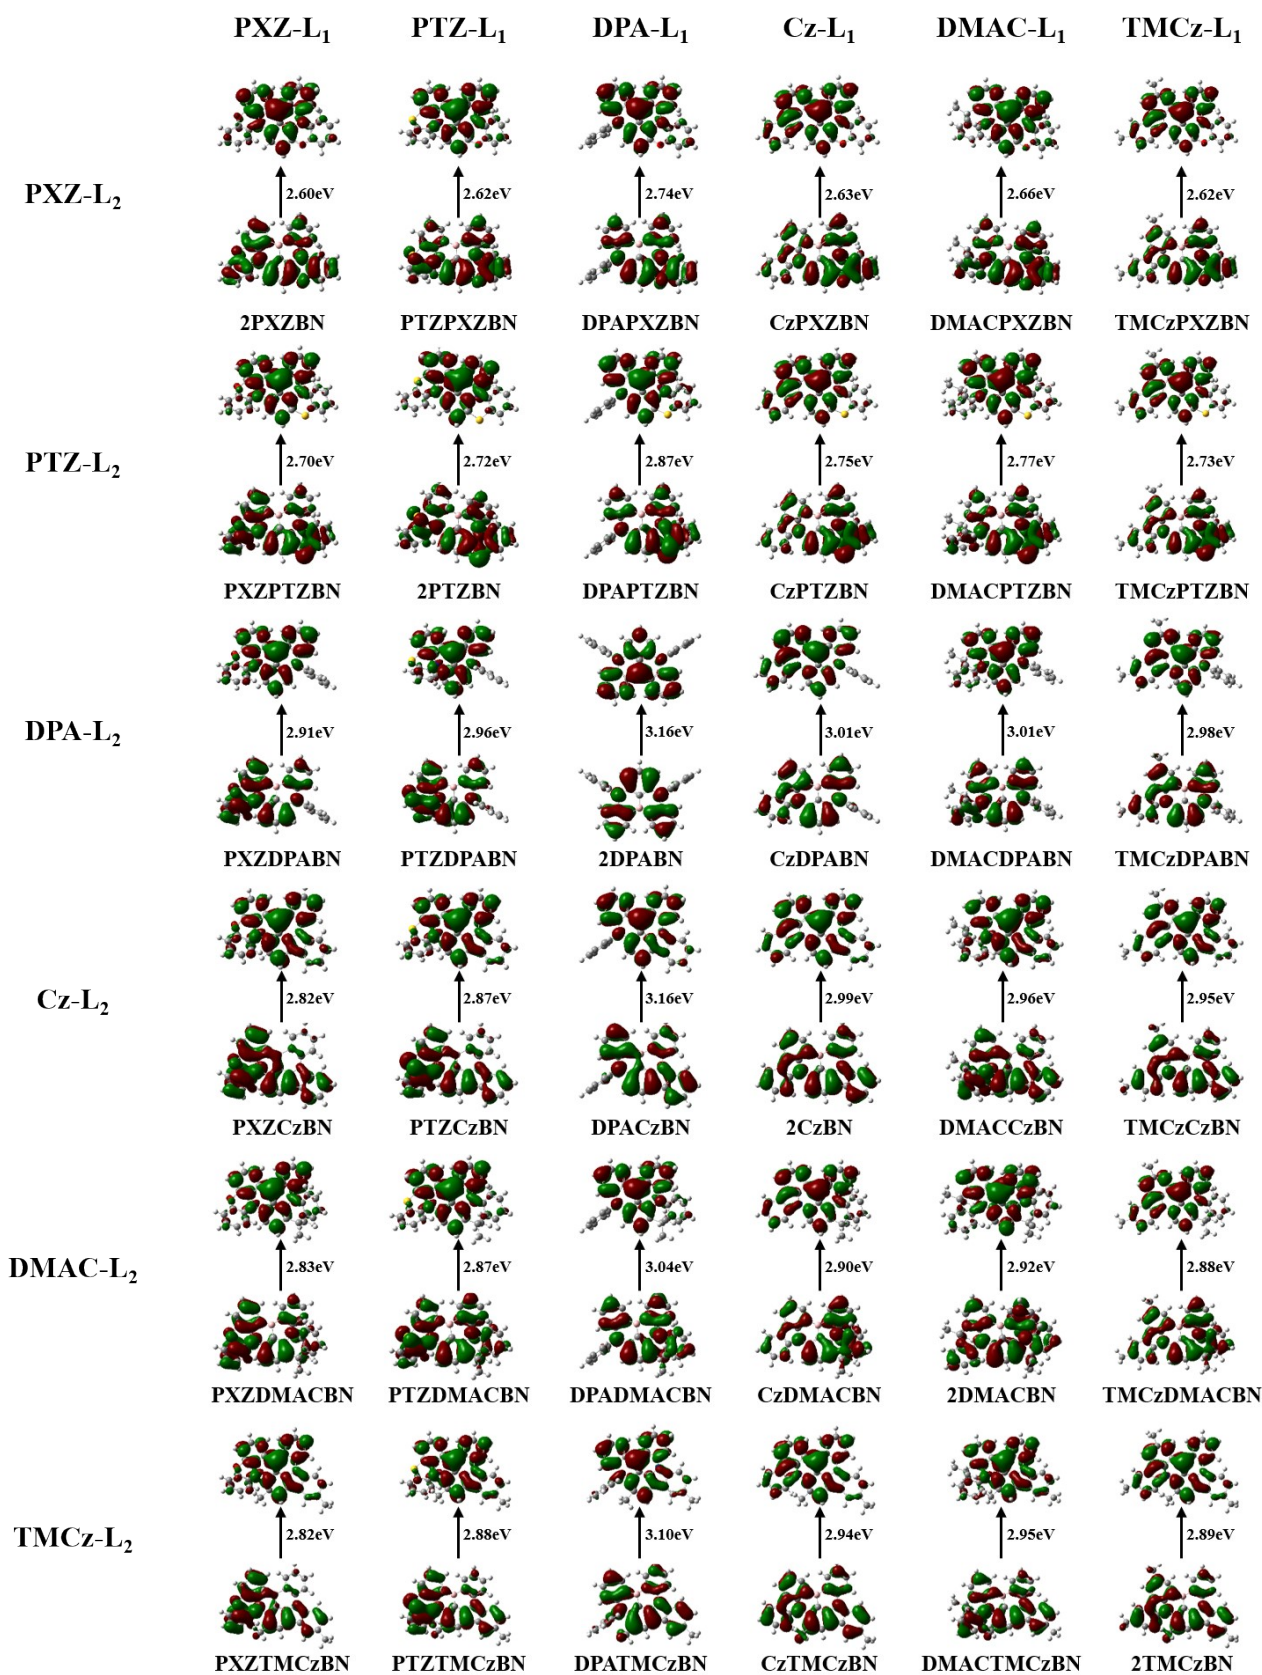

**Fig. S7.** Electron distributions of FMOs for all studied molecules by O3LYP/6-31G(d) in toluene. The value on the right side is the energy gap between the two orbitals.

**Table S5.** Molecule conformations and distributions of FMOs (HOMO and LUMO) for  $S_1$  by  $S_0$  for all studied molecules by O3LYP/6-31G(d) in toluene. The value of  $\Delta E_{H-L}$  is the energy gap between the two orbitals.

| <b>Molecules</b> | <b>LUMO<br/>(eV)</b> | <b>HOMO<br/>(eV)</b> | <b><math>\Delta E_{H-L}</math><br/>(eV)</b> | <b>Molecules</b>  | <b>LUMO<br/>(eV)</b> | <b>HOMO<br/>(eV)</b> | <b><math>\Delta E_{H-L}</math><br/>(eV)</b> |
|------------------|----------------------|----------------------|---------------------------------------------|-------------------|----------------------|----------------------|---------------------------------------------|
| <b>2PXZBN</b>    | -1.83                | -4.43                | 2.60                                        | <b>PXZCzBN</b>    | -1.88                | -4.70                | 2.82                                        |
| <b>PTZPXZBN</b>  | -1.90                | -4.52                | 2.62                                        | <b>PTZCzBN</b>    | -1.96                | -4.83                | 2.87                                        |
| <b>DPAPXZBN</b>  | -1.64                | -4.38                | 2.74                                        | <b>DPACzBN</b>    | -1.66                | -4.81                | 3.16                                        |
| <b>CzPXZBN</b>   | -1.97                | -4.60                | 2.63                                        | <b>2CzBN</b>      | -2.04                | -5.03                | 2.99                                        |
| <b>DMACPXZBN</b> | -1.78                | -4.44                | 2.66                                        | <b>DMACCzBN</b>   | -1.84                | -4.80                | 2.96                                        |
| <b>TMCzPXZBN</b> | -1.92                | -4.54                | 2.62                                        | <b>TMCzCzBN</b>   | -1.98                | -4.93                | 2.95                                        |
| <b>PXZPTZBN</b>  | -1.88                | -4.58                | 2.70                                        | <b>PXZDMACBN</b>  | -1.75                | -4.58                | 2.83                                        |
| <b>2PTZBN</b>    | -1.95                | -4.67                | 2.72                                        | <b>PTZDMACBN</b>  | -1.83                | -4.69                | 2.87                                        |
| <b>DPAPTZBN</b>  | -1.69                | -4.56                | 2.87                                        | <b>DPADMACBN</b>  | -1.55                | -4.59                | 3.04                                        |
| <b>CzPTZBN</b>   | -2.02                | -4.77                | 2.75                                        | <b>CzDMACBN</b>   | -1.91                | -4.80                | 2.90                                        |
| <b>DMACPTZBN</b> | -1.83                | -4.60                | 2.77                                        | <b>2DMACBN</b>    | -1.71                | -4.63                | 2.92                                        |
| <b>TMCzPTZBN</b> | -1.97                | -4.70                | 2.73                                        | <b>TMCzDMACBN</b> | -1.85                | -4.73                | 2.88                                        |
| <b>PXZDPABN</b>  | -1.61                | -4.52                | 2.91                                        | <b>PXZTMCzBN</b>  | -1.88                | -4.70                | 2.82                                        |
| <b>PTZDPABN</b>  | -1.69                | -4.65                | 2.96                                        | <b>PTZTMCzBN</b>  | -1.96                | -4.85                | 2.88                                        |
| <b>2DPABN</b>    | -1.39                | -4.55                | 3.16                                        | <b>DPATMCzBN</b>  | -1.67                | -4.77                | 3.10                                        |
| <b>CzDPABN</b>   | -1.78                | -4.79                | 3.01                                        | <b>CzTMCzBN</b>   | -2.00                | -4.94                | 2.94                                        |
| <b>DMACDPABN</b> | -1.57                | -4.58                | 3.01                                        | <b>DMACTMCzBN</b> | -1.83                | -4.78                | 2.95                                        |
| <b>TMCzDPABN</b> | -1.73                | -4.70                | 2.98                                        | <b>2TMCzBN</b>    | -1.95                | -4.85                | 2.89                                        |

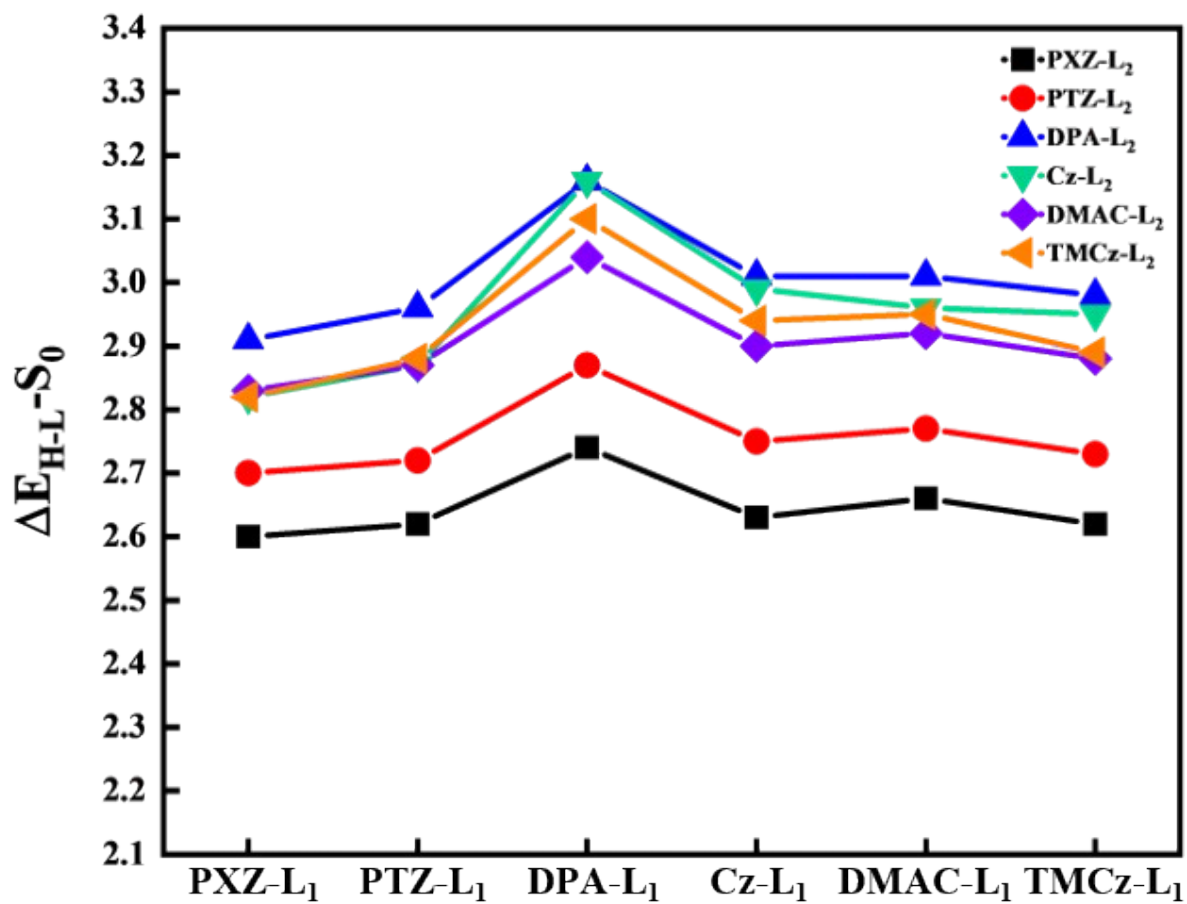

Fig. S8. The energy gap of FMOs for all studied molecules by O3LYP/6-31G(d) in toluene.

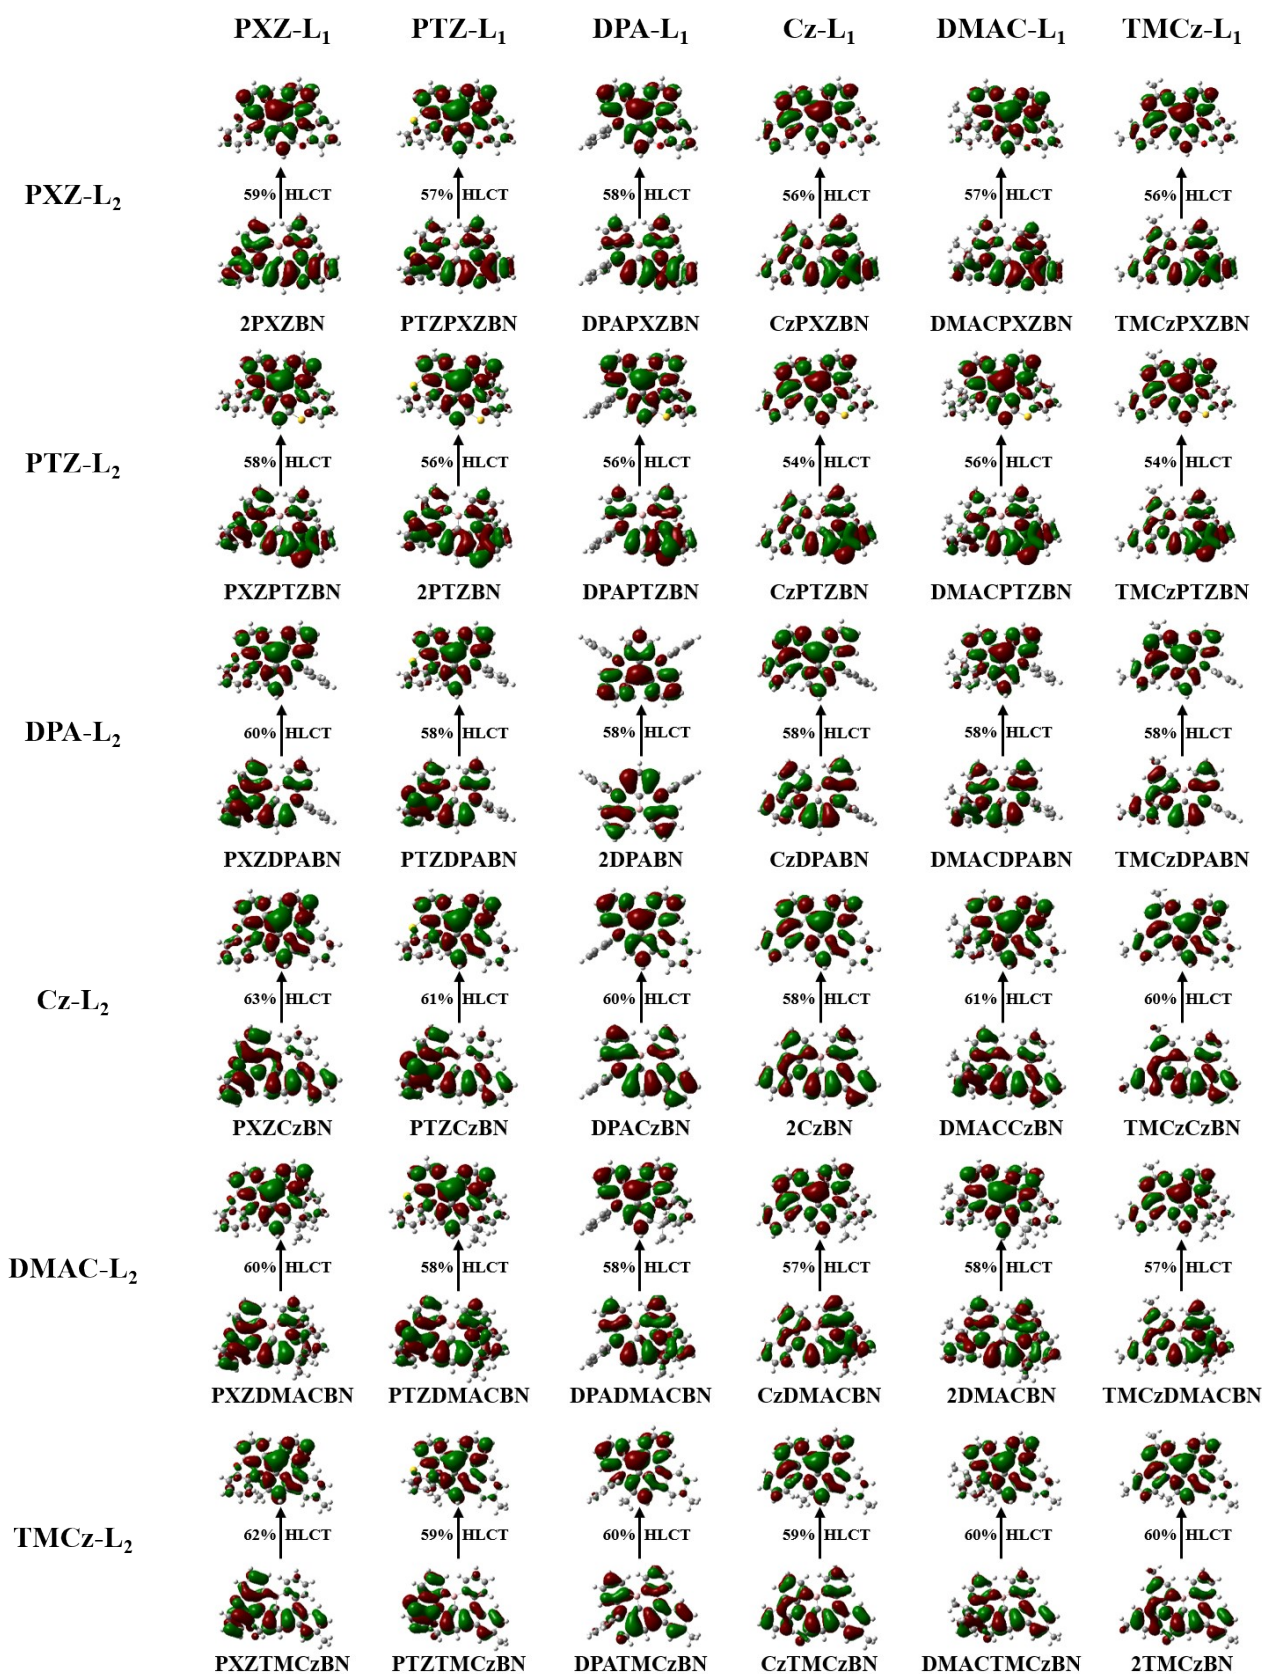

**Fig. S9.** Transition characteristics for S<sub>1</sub> state for all studied molecules by O3LYP/6-31G(d) in toluene. The value on the right side of each arrow represents the electron-hole overlap between the two orbitals.



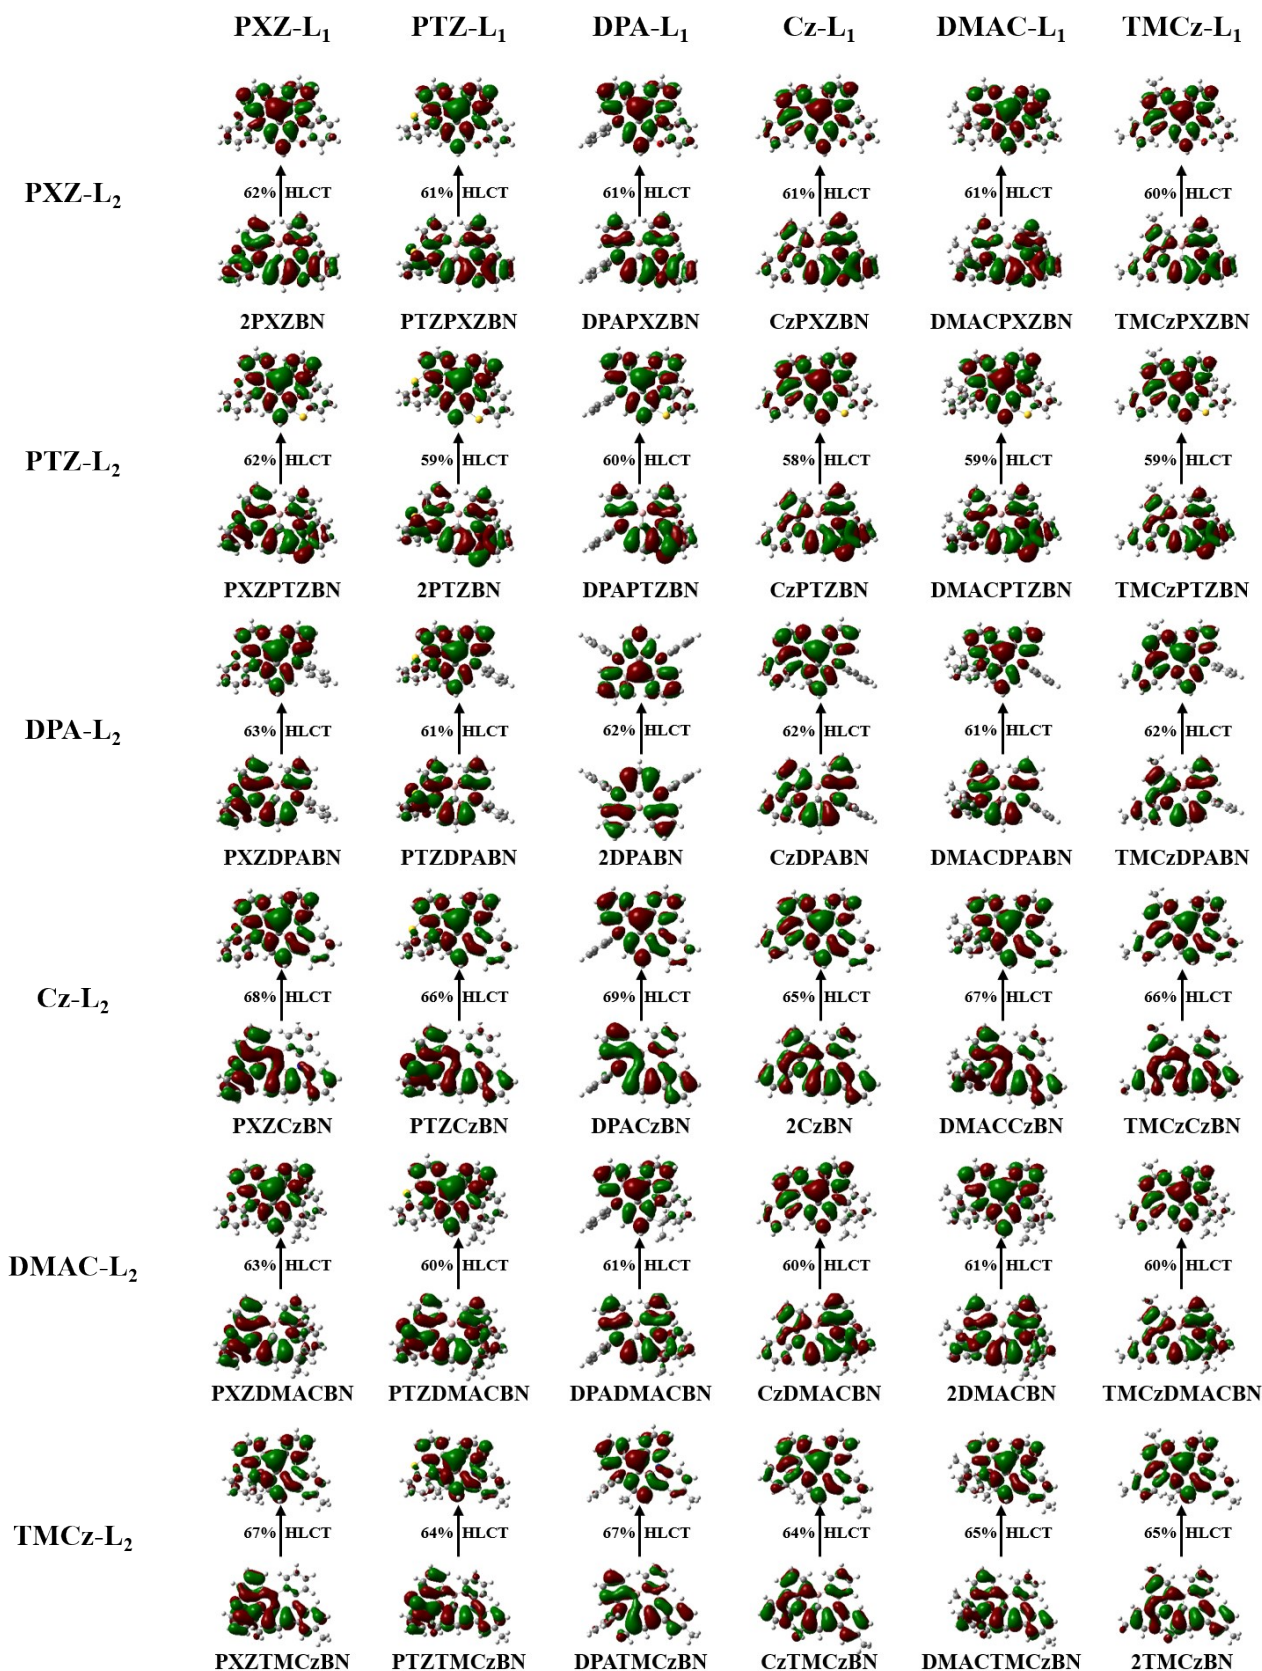

**Fig. S10.** Transition characteristics for T<sub>1</sub> state for all studied molecules by O3LYP/6-31G(d) in toluene. The value on the right side of each arrow represents the electron-hole overlap between the two orbitals.

## References:

- [1] D. Hall, J.C. Sancho-García, A. Pershin, G. Ricci, D. Beljonne, E. Zysman-Colman, Y. Olivier, Modeling of Multiresonant Thermally Activated Delayed Fluorescence Emitters- Properly Accounting for Electron Correlation Is Key! *J. Chem. Theory Comput.* 18 (2022) 4903-4918.
- [2] E.E. Bas, P. Ulukan, A. Monari, V. Aviyente, S. Catak, Photophysical Properties of Benzophenone Based TADF Emitters in Relation to Their Molecular Structure, *ChemRxiv.* 126 (2022) 473-484.
- [3] C.M. Marian, Spin-orbit coupling and intersystem crossing in molecules, *WIREs Comput. Mol. Sci.* 2 (2012) 187-203.
- [4] B. Minaev, H. Ågren, Theoretical DFT study of phosphorescence from porphyrins. *Chem. Phys.* 315 (2005) 215-239.
- [5] H. Ågren, O. Vahtras, B. Minaev, Response Theory and Calculations of Spin-Orbit Coupling Phenomena in Molecules, *Adv. Quantum Chem.* 27 (1996) 71-162.
- [6] L.H. Thomas B.A., I. The kinematics of an electron with an axis, *Phil. Mag.* 3 (1927) 1-22.
- [7] K. Aidas, C. Angeli, K. L. Bak, V. Bakken, R. Bast, L. Boman, O. Christiansen, R. Cimiraglia, S. Coriani, P. Dahle, E. K. Dalskov, U. Ekström, T. Enevoldsen, J. J. Eriksen, P. Ettenhuber, B. Fernández, L. Ferrighi, H. Fliegl, L. Frediani, K. Hald, A. Halkier, C. Hättig, H. Heiberg, T. Helgaker, A. C. Hennum, H. Hettema, E. Hjertenæs, S. Høst, I.-M. Høyvik, M. F. Iozzi, B. Jansik, H. J. Aa. Jensen, D. Jonsson, P. Jørgensen, J. Kauczor, S. Kirpekar, T. Kjærgaard, W. Klopper, S. Knecht, R. Kobayashi, H. Koch, J. Kongsted, A. Krapp, K. Kristensen, A. Ligabue, O. B. Lutnæs, J. I. Melo, K. V. Mikkelsen, R. H. Myhre, C. Neiss, C. B. Nielsen, P. Norman, J. Olsen, J. M. H. Olsen, A. Osted, M. J. Packer, F. Pawłowski, T. B. Pedersen, P. F. Provasi, S. Reine, Z. Rinkevicius, T. A. Ruden, K. Ruud, V. Rybkin, P. Salek, C. C. M. Samson, A. Sánchez de Merás, T. Saue, S. P. A. Sauer, B. Schimmelpfennig, K. Sneskov, A. H. Steindal, K. O. Sylvester-Hvid, P. R. Taylor, A. M. Teale, E. I. Tellgren, D. P. Tew, A. J. Thorvaldsen, L. Thøgersen, O. Vahtras, M. A. Watson, D. J. D. Wilson, M. Ziolkowski,

and H. Ågren, "The Dalton quantum chemistry program system", WIREs Comput. Mol. Sci. 4 (2014) 269-284.

[8] Dalton, a molecular electronic structure program, <http://daltonprogram.org>.
